# Supplementary material for: Introducing pulse oximetry in routine IMCI services in Bangladesh: A context-driven approach to influence policy and programme through stakeholder engagement
Source: PubMed Central journal article supplement (PMC8994831; doi:10.7189/jogh.12.06001), 2022-04-09

**Supplementary Document**

**Equity in antenatal care visits among adolescent mothers: an analysis of 54  
country levels trend and projection of coverage from 2000 to 2030**

Md. Mizanur Rahman, PhD; Fahima Hossain, MPH; Md. Rashedul Islam, MSc; Jenny Jung,  
MIPH; Syed Riaz Mahmud, MSc; Masahiro Hashizume, PhD

Table S1: Country specific data Sources

| <b>Country</b>            | <b>Survey name and year</b>                 |
|---------------------------|---------------------------------------------|
| Afghanistan               | DHS 2015; MICS 2010-11                      |
| Albania                   | DHS 2009, 2018                              |
| Angola                    | DHS 2007, 2011                              |
| Armenia                   | DHS 2005, 2010, 2016                        |
| Bangladesh                | DHS 2004, 2007, 2011, 2014; MICS 2006, 2013 |
| Benin                     | DHS 2006, 2012, 2018; MICS 2014             |
| Burundi                   | DHS 2010, 2012, 2017; MICS 2000, 2005       |
| Burkina Faso              | DHS 2003, 2010; MICS 2006                   |
| Cambodia                  | DHS 2000, 2005, 2010, 2014                  |
| Cameroon                  | DHS 2004, 2011; MICS 2000, 2006, 2014       |
| Central African Republic  | MICS 2000, 2006, 2010                       |
| Chad                      | DHS 2004, 2015; MICS 2000, 2010             |
| Comoros                   | DHS 2012; MICS 2000                         |
| Congo                     | DHS 2005, 2012; MICS 2015                   |
| Congo Democratic Republic | DHS 2007, 2014; MICS 2001, 2010, 2018       |
| Dominican Republic        | DHS 2002, 2007, 2013                        |
| Ethiopia                  | DHS 2000, 2005, 2011, 2016                  |
| Cote d'Ivoire             | MICS 2006, 2016                             |
| Ghana                     | DHS 2003, 2008, 2014; MICS 2006, , 2011     |
| Guinea                    | DHS 2005, 2012, 2018; MICS 2016             |
| Haiti                     | DHS 2006, 2012, 2016                        |
| Honduras                  | DHS 2006, 2012                              |
| India                     | DHS 2006, 2016; MICS 2000                   |
| Indonesia                 | DHS 2003, 2007, 2012, 2017                  |
| Kenya                     | DHS 2003, 2009, 2014; MICS 2000             |
| Kyrgyzstan                | DHS 2012; MICS 2006, 2014, 2018             |
| Laos                      | MICS 2000, 2006, 2012, 2017                 |
| Lesotho                   | DHS 2004, 2009, 2014; MICS 2014             |
| Liberia                   | DHS 2007, 2013, 2016                        |
| Madagascar                | DHS 2004, 2009; 2011, 2013, 2016; MICS 2000 |

|                       |                                                               |
|-----------------------|---------------------------------------------------------------|
| Malawi                | DHS 2000, 2004, 2010, 2016; MICS 2006, 2014                   |
| Maldives              | DHS 2009, 2017                                                |
| Mali                  | DHS 2001, 2006, 2013, 2018; MICS 2010, 2015                   |
| Mozambique            | DHS 2003, 2011, 2015, 2018; MICS 2008                         |
| Myanmar               | DHS 2016; MICS 2010                                           |
| Nepal                 | DHS 2001, 2006, 2011, 2016; MICS 2014                         |
| Niger                 | DHS 2006, 2012; MICS 2000                                     |
| Nigeria               | DHS 2003, 2008, 2010, 2013, 2015, 2018; MICS 2007, 2011, 2017 |
| Pakistan              | DHS 2013, 2018                                                |
| Papua New Guinea      | DHS 2018                                                      |
| Philippines           | DHS 2003, 2008, 2013, 2017                                    |
| Rwanda                | DHS 2000, 2005, 2008, 2010, 2015                              |
| Sao Tome and Principe | DHS 2009; MICS 2000, 2006, 2014                               |
| Senegal               | DHS 2005, 2011, 2013, 2014, 2015, 2016, 2017; MICS 2000       |
| Sierra Leone          | DHS 2008, 2013; MICS 2000, 2005, 2010, 2017                   |
| Tajikistan            | DHS 2012, 2017; MICS 2000, 2005                               |
| Tanzania              | DHS 2005, 2010, 2016, 2017                                    |
| The Gambia            | DHS 2013; MICS 2000, 2006, 2010, 2018                         |
| Timor-Leste           | DHS 2010, 2016                                                |
| Togo                  | DHS 2014, 2017; MICS 2006, 2010                               |
| Uganda                | DHS 2001, 2006, 2009, 2011, 2015, 2016                        |
| Vietnam               | DHS 2002, MICS 2000, 2006, 2011, 2014                         |
| Zambia                | DHS 2002, 2007, 2014, 2018                                    |
| Zimbabwe              | DHS 2006, 2011, 2015; MICS 2009, 2014, 2019                   |

DHS, Demographic and Health Survey; MICS, Multiple Indicator and Cluster Survey

## Appendix e-method 1: sensitivity analysis

Both covariates and the model's hierarchical structure influence how data from other countries influence predictions for a given country.<sup>1</sup> We examined the sensitivity of our results by two approaches: (1) the exclusion of country-level covariates (SDI and HRH), and (2) altering priors for the hyperparameters.

### *Sensitivity analysis: assessing the role of country-level covariates:*

Excluding country level predictors, the median absolute differences between the two sets of results and DIC values were compared.

### *Altering priors for the hyperparameters:*

Previous studies reported that to borrow strength and facilitate parameters smoothing from each group, the hyperparameters were shared by all intercept coefficients.<sup>2,3</sup> The key benefit of assigning the hyperparameter is the fact that the resulting model gains the advantages of a complete-pooled model and a no-pooled model. The half-Cauchy is quite heavy tailed and considered as fairly weakly informative. Gelman (2006) advocates for half-t priors (including the half-Cauchy) over the inverse gamma. The hyperparameter priors (hyper-priors) were assigned flat non-informative prior distributions for main analysis and weakly informative hyper-priors for sensitivity analysis. In our proposed model,  $\beta_{ij}$  are conditionally normally distributed on  $\beta_k, \sigma_k^2$  while  $\beta_k$  is conditionally normally distributed on  $\beta$  and  $\sigma^2$ . In the main analysis,  $\beta = [\beta_0, \beta_1, \beta_2]$  is the normal distribution was specified in terms of mean zero and the standard deviation of 100,  $[\beta_0, \beta_1, \beta_2] \sim N(0, 0.0001)$ . Since the hyperparameter have some influences on all intercept coefficients, the half-Cauchy distribution (weakly informative prior) applied to perform sensitivity analysis instead of gamma distribution, hyperparameters ( $\tau, \sigma_k$ , and  $\sigma$ )  $\sim$  half-Cauchy (0,25). After altering prior distribution, the median absolute differences between the two sets of results and DIC values were also compared.

Table S2: Coverage of at least single antenatal visits by age group in 54 LMICs, 2000-2030

| Country                            | Predicted coverage, proportion (95% CrI) |                  |                     |                  |                  |                    |
|------------------------------------|------------------------------------------|------------------|---------------------|------------------|------------------|--------------------|
|                                    | Aged 20-35 years                         |                  |                     | Aged 36-49 years |                  |                    |
|                                    | 2000                                     | 2018             | 2030                | 2000             | 2018             | 2030               |
| <b>South Asia</b>                  |                                          |                  |                     |                  |                  |                    |
| Afghanistan                        | 21.9 (4.5-56.2)                          | 72.1 (56.6-84.3) | 90.5 (62.1-99.2)    | 17.9 (3.5-51.1)  | 66.1 (49.6-80.5) | 88.0 (56.5-99)     |
| Bangladesh                         | 41.9 (31.1-53.9)                         | 67.6 (57.1-78.0) | 80.5 (62.5-92.9)    | 32.8 (22.8-44.4) | 58.5 (46.1-70.1) | 73.7 (51.5-89.8)   |
| India                              | 64.0 (46.3-78.1)                         | 80.4 (69.9-87.9) | 86.6 (70.0-96.3)    | 49.2 (30.1-66.4) | 68.7 (54.2-80.3) | 78.0 (53.8-93.5)   |
| Maldives                           | 99.9 (99.8-100.0)                        | 98.8 (98.1-99.3) | 92.1 (78.2-98.1)    | 99.8 (99.5-99.9) | 97.4 (95.7-98.6) | 85.3 (63.5-96.3)   |
| Nepal                              | 22.4 (15.8-30.3)                         | 83.8 (77.9-88.6) | 97.3 (94.4-98.9)    | 11.7 (7.4-16.8)  | 70.3 (60.9-79.0) | 94.1 (88.6-97.5)   |
| Pakistan                           | 43.0 (11.7-81.2)                         | 85.4 (79.1-90.2) | 94.8 (83.7-99.2)    | 32.1 (6.9-71.4)  | 77.1 (67.2-85.5) | 91.5 (74.0-98.7)   |
| <b>East Asia and the Pacific</b>   |                                          |                  |                     |                  |                  |                    |
| Cambodia                           | 44.7 (35.8-54.2)                         | 98.2 (97.1-99.0) | 99.9 (99.7-100.0)   | 34.0 (26.0-43.8) | 97.2 (95.3-98.4) | 99.8 (99.6-99.9)   |
| Indonesia                          | 88.6 (82.9-92.9)                         | 97.4 (96.1-98.3) | 99.0 (97.8-99.6)    | 85.7 (78.1-91.4) | 96.7 (94.8-98)   | 98.7 (97.1-99.5)   |
| Laos                               | 23.1 (16.7-30.7)                         | 76.3 (68.3-82.7) | 93.9 (87.9-97.2)    | 16.0 (10.7-22)   | 67.0 (56.6-76.2) | 90.6 (82.0-95.9)   |
| Myanmar                            | 55.0 (4.2-97.9)                          | 86.2 (77.6-92.4) | 89.3 (44.1-99.7)    | 50.0 (3.0-97.3)  | 81.9 (68.5-91.0) | 86.7 (36.0-99.6)   |
| Papua New Guinea                   | 51.8 (2.3-98.4)                          | 77.0 (68.0-84.9) | 82.0 (35.0-99.0)    | 43.4 (1.2-97.5)  | 65.7 (49.2-78.8) | 74.6 (23.2-98.3)   |
| Philippines                        | 86.0 (78.9-91.2)                         | 95.5 (93.5-97)   | 97.9 (95.3-99.2)    | 81.4 (71.7-88.8) | 93.8 (90.5-96.1) | 97.0 (93.4-98.9)   |
| Timor-Leste                        | 84.5 (62.3-96.0)                         | 85.3 (76.6-91.2) | 83.0 (52.9-97.0)    | 79.2 (54.0-94.3) | 79.8 (67.8-88.9) | 77.6 (43.9-95.9)   |
| Vietnam                            | 76.6 (69.8-82.3)                         | 96.3 (94.3-97.8) | 99.0 (97.8-99.6)    | 78.3 (71.6-84.5) | 96.6 (94.6-98.0) | 99.1 (98.0-99.7)   |
| <b>Eastern and Southern Africa</b> |                                          |                  |                     |                  |                  |                    |
| Angola                             | 86.7 (76.1-94.0)                         | 79.3 (69.4-86.6) | 72.0 (44.1-91.0)    | 82.5 (68.9-92.0) | 73.4 (61.6-82.5) | 65.5 (35.8-87.3)   |
| Burundi                            | 83.9 (78.3-88.5)                         | 99.7 (99.5-99.8) | 100.0 (100.0-100.0) | 78.5 (70.6-84.5) | 99.5 (99.3-99.7) | 100.0 (99.9-100.0) |
| Comoros                            | 77.3 (68.6-84.5)                         | 95.8 (92.3-97.9) | 98.7 (96.1-99.7)    | 71.3 (60.3-80.8) | 94.3 (89.4-97.2) | 98.2 (94.7-99.6)   |
| Ethiopia                           | 23.4 (17.1-30.6)                         | 61.7 (51.7-71.1) | 82.7 (68.6-91.9)    | 16.7 (11.4-23.1) | 51.3 (3.09-62.8) | 75.8 (58.0-88.2)   |
| Kenya                              | 81.0 (74.7-86.2)                         | 96.3 (94.5-97.6) | 98.9 (97.4-99.6)    | 74.3 (65.5-81.9) | 94.7 (91.8-96.8) | 98.5 (96.4-99.4)   |
| Lesotho                            | 86.7 (78.2-92.2)                         | 96.2 (93.7-98.1) | 98.2 (95.4-99.6)    | 79.9 (67.3-88.4) | 93.8 (89.2-97.1) | 97.1 (92.2-99.5)   |
| Madagascar                         | 75.6 (68.5-81.8)                         | 88.6 (84.3-92.0) | 93.8 (88.3-97.1)    | 71.4 (62.6-79.5) | 86.2 (80.8-90.8) | 92.4 (85.6-96.7)   |
| Malawi                             | 90.8 (87.8-93.3)                         | 97.5 (96.7-98.1) | 99.0 (98.2-99.4)    | 85.9 (80.9-89.8) | 96.0 (94.4-97.2) | 98.3 (97.1-99.1)   |
| Mozambique                         | 84.8 (77.8-90.2)                         | 93.4 (90.9-95.4) | 96.3 (92.5-98.2)    | 77.6 (68.2-86.2) | 89.8 (85.8-93.0) | 94.1 (88.7-97.3)   |
| Rwanda                             | 90.4 (86.6-93.3)                         | 99.5 (99.2-99.7) | 99.9 (99.8-100.0)   | 87.2 (81.5-91.4) | 99.3 (98.8-99.6) | 99.9 (99.8-100.0)  |
| Tanzania                           | 90.7 (84.3-95.0)                         | 98.2 (97.5-98.8) | 99.4 (98.6-99.7)    | 87.8 (79.7-93.7) | 97.5 (96.2-98.4) | 99.1 (98.0-99.7)   |
| Uganda                             | 92.1 (88.7-94.6)                         | 97.0 (95.8-98.0) | 98.5 (97.1-99.4)    | 88.8 (83.8-92.6) | 95.7 (93.9-97.1) | 97.8 (95.7-99.0)   |
| Zambia                             | 91.4 (87.6-94.3)                         | 96.7 (95.4-97.7) | 98.3 (96.5-99.2)    | 87.3 (81.0-92.1) | 95.0 (92.7-96.9) | 97.4 (94.6-98.9)   |

|                                    |                  |                   |                     |                  |                   |                     |
|------------------------------------|------------------|-------------------|---------------------|------------------|-------------------|---------------------|
| Zimbabwe                           | 89.4 (81.9-94.9) | 93.2 (89.6-95.8)  | 94.6 (86.0-98.5)    | 85.7 (76.0-93.0) | 90.6 (85.6-94.5)  | 92.5 (80.7-98.0)    |
| <b>West and Central Africa</b>     |                  |                   |                     |                  |                   |                     |
| Benin                              | 83.5 (73.1-91.2) | 84.9 (79.4-89.3)  | 86.8 (71.7-94.9)    | 79.3 (66.5-88.9) | 80.9 (74.4-86.1)  | 83.3 (66.2-93.4)    |
| Burkina Faso                       | 61.4 (46.3-74.8) | 99.2 (98.0-99.7)  | 99.9 (99.7-100.0)   | 53.0 (37.8-67.9) | 98.8 (97.0-99.6)  | 99.9 (99.6-100.0)   |
| Cameroon                           | 80.0 (73.4-85.6) | 87.5 (81.0-92.0)  | 90.9 (79.9-96.3)    | 75.2 (66.8-82.6) | 84.2 (76.1-89.8)  | 88.4 (74.7-95.3)    |
| Central African Republic           | 64.0 (53.9-73.5) | 75.2 (58.9-87.2)  | 80.6 (52.3-95.3)    | 55.2 (43.9-66.5) | 67.9 (49.0-82.8)  | 74.7 (42.6-93.3)    |
| Chad                               | 40.4 (31.7-49.0) | 70.0 (59.7-78.9)  | 83.8 (68.8-93.2)    | 33.9 (24.9-43.3) | 63.8 (51.2-75.1)  | 79.7 (62.2-91.1)    |
| Congo                              | 78 (65.1-88.3)   | 96.4 (94.4-97.8)  | 98.9 (97.2-99.7)    | 73.2 (57.9-85.5) | 95.4 (92.5-97.3)  | 98.6 (96.2-99.6)    |
| Cote d'Ivoire                      | 76.8 (62.9-87.5) | 95.1 (91.8-97.2)  | 98.3 (95.5-99.5)    | 70.2 (54.4-83.4) | 93.1 (88.3-96.2)  | 97.5 (93.2-99.4)    |
| Democratic Republic of the Congo   | 80.0 (73.0-86.4) | 88.0 (83.8-91.5)  | 91.8 (84.7-96.2)    | 75.1 (66.2-83.1) | 84.7 (78.5-89.5)  | 89.4 (79.3-95.1)    |
| Ghana                              | 90.3 (85.9-93.8) | 98.1 (96.9-99.0)  | 99.3 (98.3-99.8)    | 85.6 (78.6-91.1) | 97.1 (95.2-98.4)  | 99.0 (97.3-99.7)    |
| Guinea                             | 83.8 (74.4-90.6) | 86.4 (82.1-90.0)  | 87.4 (77.1-94.1)    | 77.4 (64.5-87.4) | 80.7 (73.7-86.4)  | 82.2 (67.2-91.4)    |
| Liberia                            | 44.7 (25.4-65.4) | 98.8 (98.0-99.3)  | 99.9 (99.8-100.0)   | 36.1 (17.5-57.3) | 98.2 (97.0-99.0)  | 99.9 (99.7-100.0)   |
| Mali                               | 59.5 (48.2-70.0) | 82.2 (77.0-86.7)  | 91.1 (84.4-95.7)    | 51.5 (39.0-63.4) | 76.8 (69.6-83.3)  | 88.0 (78.3-94.0)    |
| Niger                              | 38.7 (28.8-48.9) | 92.1 (85.9-96.0)  | 98.7 (96.3-99.7)    | 33.7 (23.2-46.1) | 90.2 (81.6-95.4)  | 98.3 (95.0-99.6)    |
| Nigeria                            | 54.5 (44.1-64.6) | 67.1 (60.0-73.4)  | 74.5 (60.6-85.3)    | 52.0 (41.3-62.7) | 64.7 (56.9-72.2)  | 72.5 (56.7-84.5)    |
| Sao Tome and Principe              | 91.6 (87.7-94.6) | 99.5 (99.2-99.7)  | 99.9 (99.8-100.0)   | 78.5 (69.2-86.2) | 98.5 (97.5-99.2)  | 99.8 (99.5-99.9)    |
| Senegal                            | 81.3 (75.1-86.1) | 97.1 (96.4-97.8)  | 99.2 (98.8-99.6)    | 75.9 (68.3-82.3) | 96.1 (94.7-97.1)  | 99.0 (98.2-99.4)    |
| Sierra Leone                       | 68.7 (61.1-76.0) | 98.5 (97.9-98.9)  | 99.8 (99.7-99.9)    | 60.3 (50.7-69.7) | 97.8 (96.7-98.5)  | 99.8 (99.5-99.9)    |
| The Gambia                         | 96.8 (94.5-98.3) | 99.3 (98.9-99.5)  | 99.7 (99.3-99.9)    | 96.2 (93.2-98.2) | 99.2 (98.7-99.5)  | 99.7 (99.2-99.9)    |
| Togo                               | 89.5 (81.9-94.6) | 63.3 (53.2-72.5)  | 38.5 (18.5-62.6)    | 86.5 (76.8-93.3) | 56.7 (44.4-68.2)  | 32.5 (13.6-56.1)    |
| <b>Latin America and Caribbean</b> |                  |                   |                     |                  |                   |                     |
| Dominican Republic                 | 56.7 (33.1-80.0) | 99.9 (99.8-100.0) | 100.0 (100.0-100.0) | 52.3 (29.3-75.7) | 99.9 (99.8-100.0) | 100.0 (100.0-100.0) |
| Haiti                              | 80.8 (67.9-89.9) | 92.3 (88.1-95.1)  | 95.8 (89.2-98.8)    | 73.3 (56.8-86.1) | 88.5 (82.0-93.2)  | 93.8 (84.7-98.3)    |
| Honduras                           | 84.4 (70.6-93.1) | 98.2 (96.4-99.3)  | 99.5 (98.0-99.9)    | 78.9 (60.8-90.2) | 97.4 (94.2-99.0)  | 99.2 (96.8-99.9)    |
| <b>Central and Eastern Europe</b>  |                  |                   |                     |                  |                   |                     |
| Albania                            | 99.2 (98.2-99.7) | 89.9 (85.6-93.4)  | 60.6 (35.4-83.4)    | 98.9 (97.4-99.6) | 86.3 (80.1-91.3)  | 52.7 (25.9-77.8)    |
| Armenia                            | 82.6 (71.8-89.9) | 99.9 (99.9-100.0) | 100.0 (100.0-100.0) | 79.8 (67.8-88.7) | 99.9 (99.9-100.0) | 100.0 (100.0-100.0) |
| Kyrgyzstan                         | 81.6 (69.2-90.1) | 99.7 (99.5-99.8)  | 100.0 (100.0-100.0) | 78.0 (64.1-88.5) | 99.6 (99.3-99.7)  | 100.0 (99.9-100.0)  |
| Tajikistan                         | 72.2 (63.4-79.3) | 90.7 (86.6-93.9)  | 96.0 (91.9-98.4)    | 58.2 (47.1-68.7) | 83.9 (76.6-89.6)  | 92.7 (85.3-97.1)    |

LMICs, low-and middle-income countries; CrI, credible interval

Table S3: Coverage of at least four antenatal visits by age group in 54 LMICs, 2000-2030

| Country                            | Predicted coverage, proportion (95% CrI) |                  |                  |                  |                  |                  |
|------------------------------------|------------------------------------------|------------------|------------------|------------------|------------------|------------------|
|                                    | Aged 20-35 years                         |                  |                  | Aged 36-49 years |                  |                  |
|                                    | 2000                                     | 2018             | 2030             | 2000             | 2018             | 2030             |
| <b>South Asia</b>                  |                                          |                  |                  |                  |                  |                  |
| Afghanistan                        | 5.6 (1.7-12.9)                           | 24.8 (17.2-33.8) | 53.4 (23.8-82.5) | 5.1 (1.5-11.4)   | 23 (15.8-32.3)   | 51.1 (21.5-81.3) |
| Bangladesh                         | 13.7 (9.7-18.3)                          | 29.1 (22.7-35.3) | 44.3 (27.0-60.8) | 7.5 (5.1-10.3)   | 17.3 (12.8-22.6) | 29.1 (16.4-44.3) |
| India                              | 22.3 (14.9-31.4)                         | 54.1 (44.7-62.7) | 74.8 (58.3-86.9) | 12.7 (7.7-19.1)  | 37.4 (29.0-47.0) | 60.4 (42.2-77.0) |
| Maldives                           | 85.8 (76.7-92.4)                         | 85.2 (80.7-88.9) | 84.1 (70.7-92.7) | 82.3 (71.7-90.5) | 81.5 (74.8-86.7) | 80.2 (63.5-90.9) |
| Nepal                              | 8.7 (6.5-11.1)                           | 68.2 (62.5-73.5) | 94.6 (91.5-96.6) | 3.5 (2.6-4.6)    | 44.9 (38.0-52.0) | 86.9 (80.3-92.0) |
| Pakistan                           | 15.5 (5.3-34.9)                          | 49.6 (42.4-57.1) | 75.3 (55.3-89.6) | 11.3 (3.5-25.9)  | 40.3 (32.1-48.6) | 68.0 (44.6-86.3) |
| <b>East Asia and the Pacific</b>   |                                          |                  |                  |                  |                  |                  |
| Cambodia                           | 11.6 (9.1-14.6)                          | 89.2 (85.6-92.1) | 99.2 (98.6-99.6) | 7.3 (5.5-9.3)    | 83.0 (77.2-87.8) | 98.7 (97.7-99.4) |
| Indonesia                          | 74.4 (67.9-80.3)                         | 90.4 (87.5-92.7) | 95.3 (92.1-97.5) | 69.3 (61.2-76.3) | 87.9 (84.4-91.0) | 94.0 (90.2-96.8) |
| Laos                               | 8.9 (3.1-18.0)                           | 60.5 (52.2-69.1) | 90.3 (78.8-96.9) | 6.8 (2.3-15.3)   | 53.1 (43.4-62.4) | 87.4 (73.3-96)   |
| Myanmar                            | 38.5 (6.9-81.6)                          | 60.0 (49.7-69.6) | 71.3 (29.7-94.6) | 37.3 (6.2-81.1)  | 58.4 (46.1-69.2) | 70.1 (29.0-94.1) |
| Papua New Guinea                   | 34.8 (5.0-78.4)                          | 49.2 (41.3-57.1) | 60.6 (26.6-88.0) | 28.1 (3.4-72.6)  | 39.7 (29.8-49.5) | 52.1 (19.5-83.3) |
| Philippines                        | 63.7 (55.7-71.0)                         | 86.4 (83.0-89.3) | 93.7 (90.1-96.3) | 56.0 (47.7-64.0) | 82.2 (77.4-86.2) | 91.5 (86.4-95.0) |
| Timor-Leste                        | 26.1 (13.2-43.5)                         | 80.1 (72.9-86.0) | 95.2 (88.2-98.5) | 21.2 (10.2-36.3) | 75.2 (66.5-82.9) | 93.7 (85.0-98.2) |
| Vietnam                            | 26.4 (19.8-33.3)                         | 75.4 (68.6-81.6) | 92.6 (86.7-96.5) | 28.9 (21.9-37.0) | 77.6 (70.2-84.3) | 93.3 (87.6-96.9) |
| <b>Eastern and Southern Africa</b> |                                          |                  |                  |                  |                  |                  |
| Angola                             | 33.6 (5.1-76.6)                          | 65.5 (56.0-74.4) | 80.6 (47.0-97.3) | 29.6 (4.0-73.3)  | 60.2 (49.5-70.8) | 77.3 (38.4-96.8) |
| Burundi                            | 18.9 (9.4-31.6)                          | 55.2 (47.4-63.2) | 78.8 (62.3-90.8) | 15.9 (7.5-27.1)  | 49.9 (40.7-59.2) | 75.1 (56.2-89.3) |
| Comoros                            | 32.2 (7.8-65.9)                          | 60.0 (41.0-77.5) | 73.6 (28.5-97.0) | 29.7 (7.4-66.6)  | 57.0 (37.5-75.9) | 71.4 (26.7-97.0) |
| Ethiopia                           | 8.8 (6.9-11.1)                           | 32.1 (26.3-38.5) | 57.9 (45.2-69.9) | 5.9 (4.4-7.7)    | 23.7 (18.7-29.4) | 47.5 (34.9-60.0) |
| Kenya                              | 44.9 (36.0-53.6)                         | 61.0 (53.7-67.9) | 71.7 (56.9-83.6) | 39.5 (30.8-48.5) | 55.6 (47.3-63.7) | 67 (51.5-80.9)   |
| Lesotho                            | 66.2 (56.4-74.7)                         | 76 (68.8-82.5)   | 81.2 (67.2-90.7) | 62.9 (52.5-72.8) | 73.3 (64.5-80.4) | 79.0 (63.6-89.3) |
| Madagascar                         | 34.8 (23.7-46.4)                         | 59.4 (39.8-76.7) | 73.1 (39.3-93.8) | 31.6 (21.4-42.9) | 55.9 (35.8-74.9) | 70.3 (35.0-93.2) |
| Malawi                             | 54.4 (48.3-60.5)                         | 45.3 (39.2-51.4) | 39.8 (28.7-50.5) | 49.7 (43.4-55.9) | 40.6 (34.0-47.0) | 35.4 (24.4-46.0) |
| Mozambique                         | 55.0 (46.5-63.5)                         | 52.3 (45.9-58.3) | 50.8 (37.7-62.8) | 49.2 (40.2-58.9) | 46.5 (39.8-53.4) | 45.1 (32.3-57.8) |
| Rwanda                             | 9.8 (7.7-12.3)                           | 58.4 (50.6-65.7) | 88.8 (81.3-93.7) | 8.4 (6.4-10.8)   | 54.0 (45.9-62.1) | 86.9 (78.1-92.8) |
| Tanzania                           | 52.3 (43.1-61.7)                         | 53.9 (47.6-59.7) | 55.1 (41.6-67.5) | 46.9 (37.1-57.1) | 48.4 (41.2-55.8) | 49.7 (36.2-63.4) |
| Uganda                             | 39.6 (32.8-46.4)                         | 61.3 (54.3-68.2) | 74.0 (62.9-83.5) | 33.7 (27.2-40.8) | 55.0 (46.8-63.4) | 68.8 (55.7-80.0) |
| Zambia                             | 66.0 (58.9-72.6)                         | 59.0 (52.7-65.0) | 54.3 (42.2-65.9) | 63.7 (56.1-70.9) | 56.5 (49.2-63.4) | 51.8 (39.0-63.9) |
| Zimbabwe                           | 55.8 (44.2-65.8)                         | 74.0 (68.3-79.7) | 83.0 (71.9-91.4) | 52.1 (40.1-62.3) | 71.0 (64.1-77.5) | 80.8 (68.3-90.5) |

|                                    |                  |                  |                  |                  |                  |                  |
|------------------------------------|------------------|------------------|------------------|------------------|------------------|------------------|
| <b>West and Central Africa</b>     |                  |                  |                  |                  |                  |                  |
| Benin                              | 62.0 (51.3-71.3) | 52.1 (45.6-58.3) | 47.2 (32.1-61.8) | 57.1 (45.6-67.5) | 46.9 (40.6-53.5) | 42.2 (28.4-57.0) |
| Burkina Faso                       | 14.3 (10.0-19.8) | 55.5 (41.4-69.3) | 81.6 (61.9-94.0) | 11.7 (7.6-16.8)  | 49.8 (35.6-64.2) | 78.0 (56.5-92.5) |
| Cameroon                           | 61.3 (51.8-70.2) | 60.6 (51.4-68.8) | 60.3 (41.8-76.4) | 57.3 (46.9-66.5) | 56.5 (46.1-65.4) | 56.3 (36.8-73.2) |
| Central African Republic           | 32.2 (25.9-39.6) | 39.9 (28.3-52.1) | 46.0 (24.6-67.1) | 28.0 (21.5-35.5) | 35.2 (23.5-48.6) | 41.2 (20.6-63.5) |
| Chad                               | 12.9 (9.1-17.6)  | 38.9 (30.4-47.3) | 62.6 (44.7-77.9) | 10.9 (7.4-15.6)  | 34.5 (26.2-43.8) | 58.1 (39.9-75.0) |
| Congo                              | 66.6 (55.9-75.9) | 83.9 (78.5-88.3) | 90.7 (82.9-95.7) | 63.2 (51.4-73.5) | 81.7 (75.3-86.9) | 89.3 (80.6-95.1) |
| Cote d'Ivoire                      | 34.2 (4.5-78.4)  | 55.5 (45.9-65.6) | 68.6 (26.7-94.7) | 30.4 (3.6-74.7)  | 50.3 (38.6-61.4) | 64.6 (22.3-93.7) |
| Democratic Republic of the Congo   | 45.1 (34.9-55.5) | 46.9 (40.3-53.2) | 49.1 (34.2-63.0) | 40.2 (30.3-51.4) | 42.0 (35.4-48.8) | 44.2 (29.5-58.9) |
| Ghana                              | 63.3 (55.7-70.4) | 89.7 (86.2-92.7) | 96.1 (92.9-98.2) | 60.5 (52.4-68.3) | 88.5 (84.2-91.9) | 95.6 (91.8-98.0) |
| Guinea                             | 54.5 (44.3-64.1) | 47.9 (41.6-54.1) | 43.8 (31.8-56.9) | 50.6 (40.4-60.3) | 44.0 (37.5-50.3) | 40.0 (27.6-53.2) |
| Liberia                            | 45.6 (33.3-59.7) | 83.4 (78.4-87.5) | 94.0 (88.6-97.3) | 42.5 (29.5-56.2) | 81.5 (75.4-86.4) | 93.3 (86.4-96.9) |
| Mali                               | 30.4 (24.1-37.4) | 44.1 (38.8-49.4) | 54.6 (43.5-65.1) | 26.9 (20.5-33.9) | 39.8 (33.9-45.5) | 50.2 (39.0-60.7) |
| Niger                              | 8.6 (4.6-14.3)   | 52.4 (39.2-65.7) | 83.9 (64.0-95.0) | 8.1 (4.3-13.6)   | 50.7 (35.8-65.1) | 82.9 (60.8-95.0) |
| Nigeria                            | 44.5 (37.7-51.4) | 51.5 (46.1-56.4) | 56.5 (45.7-65.9) | 43.5 (36.4-50.5) | 50.5 (44.9-56.6) | 55.5 (44.0-66.4) |
| Sao Tome and Principe              | 58.2 (37.3-76.1) | 86.7 (79.8-91.4) | 94.1 (83.5-98.6) | 50.7 (31.4-70.9) | 82.6 (74.0-89.4) | 92.1 (78.1-98.1) |
| Senegal                            | 34.3 (26.3-44.1) | 54.8 (49.7-59.7) | 68.1 (56.2-77.7) | 29.3 (21.6-38.8) | 48.9 (43.6-54.4) | 62.8 (51.1-73.4) |
| Sierra Leone                       | 45.8 (33.4-59.3) | 81.2 (75.8-85.3) | 92.5 (85.7-96.4) | 41.1 (28.9-54.3) | 78.0 (71.9-83.5) | 91.0 (83.0-95.9) |
| The Gambia                         | 69.6 (59.7-77.8) | 78.0 (73.1-82.2) | 82.5 (72.4-89.7) | 69.1 (59.5-78.0) | 77.6 (72.0-82.3) | 82.1 (71.6-89.7) |
| Togo                               | 34.5 (16.2-57.3) | 50.8 (38.1-63.1) | 61.5 (28.2-87.2) | 29.8 (12.8-52.0) | 45.2 (32.5-58.7) | 56.5 (24.1-84.2) |
| <b>Latin America and Caribbean</b> |                  |                  |                  |                  |                  |                  |
| Dominican Republic                 | 82.3 (71.7-89.9) | 96.4 (94.3-98.0) | 98.8 (96.6-99.7) | 77.8 (64.4-87.3) | 95.3 (92.3-97.3) | 98.3 (95.5-99.6) |
| Haiti                              | 46.3 (35.0-57.6) | 69.7 (62.8-75.8) | 81.9 (69.3-90.6) | 42.1 (30.9-53.7) | 66.0 (57.6-73.7) | 79.2 (64.2-89.1) |
| Honduras                           | 93.7 (89.3-96.4) | 85.5 (76.5-91.5) | 74.8 (46.1-92.2) | 91.8 (86.1-95.5) | 81.5 (70.9-89.8) | 69.3 (38.3-90.2) |
| <b>Central and Eastern Europe</b>  |                  |                  |                  |                  |                  |                  |
| Albania                            | 63.7 (49.9-78.2) | 77.9 (72.4-82.4) | 84.7 (72.8-92.1) | 57.8 (42.4-73.2) | 73.2 (66.1-79.3) | 81.2 (67.1-90.5) |
| Armenia                            | 61.9 (51.8-71.4) | 97.8 (96.9-98.4) | 99.8 (99.5-99.9) | 66.3 (55.7-75.7) | 98.2 (97.4-98.8) | 99.8 (99.6-99.9) |
| Kyrgyzstan                         | 82.1 (66.5-92.1) | 93.0 (90.8-94.7) | 96.1 (91.4-98.5) | 78.0 (61.5-89.8) | 91.1 (88.1-93.6) | 95.1 (89.3-98.2) |
| Tajikistan                         | 29.4 (11.9-52.3) | 68.1 (60.3-75.3) | 86.0 (69.4-95.5) | 21.6 (7.9-39.6)  | 58.0 (47.4-67.4) | 80.1 (58.6-93.2) |

LMICs, low-and middle-income countries; CrI, credible interval



Table S4: Coverage of at least single ANC visit among adolescent mothers according area of residence in 54 LMICs, 2000-2030

| Country                            | Urban (predicted coverage, proportion with 95% CrI) |                  |                    | Rural (predicted coverage, proportion with 95% CrI) |                  |                    |
|------------------------------------|-----------------------------------------------------|------------------|--------------------|-----------------------------------------------------|------------------|--------------------|
|                                    | 2000                                                | 2018             | 2030               | 2000                                                | 2018             | 2030               |
| <b>South Asia</b>                  |                                                     |                  |                    |                                                     |                  |                    |
| Afghanistan                        | 23.6 (8.9-44.7)                                     | 86.2 (72.1-94.2) | 97.5 (90.2-99.7)   | 8.9 (3.0-20.2)                                      | 66.6 (46.4-81.6) | 92.8 (73.4-99.0)   |
| Bangladesh                         | 62.0 (41.5-78.0)                                    | 81.2 (65.9-91.1) | 87.7 (62.8-97.9)   | 40.0 (23.7-58.7)                                    | 63.8 (45.8-79.1) | 75.5 (42.4-94.3)   |
| India                              | 82.5 (59.9-94.8)                                    | 90.3 (79.2-96.4) | 91.8 (69.1-99.1)   | 66.1 (38.5-87.0)                                    | 78.9 (60.7-91.0) | 82.6 (45.5-97.6)   |
| Maldives                           | 100.0 (99.9-100.0)                                  | 99.8 (99.5-99.9) | 98.6 (94.2-99.9)   | 99.9 (99.6-100.0)                                   | 99.3 (98.4-99.7) | 95.9 (83.6-99.7)   |
| Nepal                              | 62.2 (45.2-78.2)                                    | 94.0 (89.3-97.1) | 98.5 (95.6-99.6)   | 31.2 (17.0-47.0)                                    | 80.9 (69.5-89.8) | 94.5 (85.7-98.6)   |
| Pakistan                           | 56.0 (25.8-83.2)                                    | 89.7 (81.1-95.5) | 96.1 (86.2-99.4)   | 39.7 (15.5-69.4)                                    | 81.1 (67.0-90.2) | 92.6 (75.5-98.8)   |
| <b>East Asia and the Pacific</b>   |                                                     |                  |                    |                                                     |                  |                    |
| Cambodia                           | 76.9 (62.8-88.0)                                    | 99.7 (99.3-99.9) | 100.0 (99.9-100.0) | 40.4 (24.8-56.4)                                    | 98.4 (96.6-99.3) | 99.9 (99.7-100.0)  |
| Indonesia                          | 94.0 (88.1-97.6)                                    | 97.8 (95.8-99.0) | 98.7 (96.1-99.7)   | 83.6 (71.0-92.4)                                    | 93.5 (88.2-96.9) | 96.1 (88.5-99.2)   |
| Laos                               | 47.1 (29.0-64.4)                                    | 90.3 (82.1-95.5) | 97.6 (93.2-99.5)   | 17.9 (9.2-29.0)                                     | 69.3 (52.5-82.7) | 90.8 (76.5-97.8)   |
| Myanmar                            | 89.3 (61.3-98.8)                                    | 93.7 (85.5-97.9) | 92.2 (64.1-99.6)   | 69.8 (26.1-95.3)                                    | 78.2 (58.6-90.7) | 77.4 (31.6-98.3)   |
| Papua New Guinea                   | 66.4 (5.0-99.3)                                     | 89.4 (77.0-95.9) | 90.8 (54.1-99.7)   | 51.2 (1.9-98.2)                                     | 75.7 (55.9-89.6) | 81.2 (30.6-99.1)   |
| Philippines                        | 91.3 (82.9-96.5)                                    | 96.3 (93.2-98.3) | 97.6 (93.0-99.5)   | 82.9 (68.8-92.3)                                    | 92.2 (85.2-96.3) | 94.8 (84.4-99.0)   |
| Timor-Leste                        | 85.8 (58.9-98.0)                                    | 94.2 (87.0-97.9) | 94.5 (74.3-99.7)   | 67.2 (26.5-94.0)                                    | 83.1 (66.3-93.6) | 85.7 (44.9-99.1)   |
| Vietnam                            | 99.3 (98.7-99.7)                                    | 99.9 (99.7-99.9) | 99.9 (99.8-100.0)  | 64.3 (48.7-77.4)                                    | 89.6 (80.8-95.4) | 95.6 (86.8-99.1)   |
| <b>Eastern and Southern Africa</b> |                                                     |                  |                    |                                                     |                  |                    |
| Angola                             | 98.8 (96.6-99.7)                                    | 92.5 (84.4-97.2) | 73.8 (34.8-96.5)   | 91.7 (79.0-97.7)                                    | 61.9 (41.9-78.8) | 32.8 (5.8-74.0)    |
| Burundi                            | 81.5 (69.2-90.3)                                    | 99.2 (98.4-99.6) | 99.9 (99.7-100.0)  | 81.1 (70.5-89.1)                                    | 99.1 (98.5-99.5) | 99.9 (99.7-100.0)  |
| Comoros                            | 80.9 (64.6-91.4)                                    | 95.2 (88.2-98.6) | 97.9 (91.2-99.8)   | 70.2 (53.8-83.0)                                    | 91.7 (81.4-97.2) | 96.2 (85.6-99.6)   |
| Ethiopia                           | 53.3 (36.2-70.8)                                    | 92.3 (84.7-96.6) | 98.1 (93.8-99.6)   | 16.7 (9.3-27.6)                                     | 67.8 (51.0-81.6) | 90.1 (73.5-97.5)   |
| Kenya                              | 79.1 (67.1-88.1)                                    | 96.2 (92.9-98.2) | 98.8 (96.6-99.8)   | 73.4 (60.9-84.6)                                    | 94.9 (90.5-97.5) | 98.4 (95.5-99.7)   |
| Lesotho                            | 91.3 (80.6-96.9)                                    | 98.5 (96.2-99.5) | 99.3 (97.1-99.9)   | 82.8 (65.6-94.1)                                    | 96.7 (92.1-98.9) | 98.6 (93.8-99.9)   |
| Madagascar                         | 83.3 (73.5-90.9)                                    | 94.4 (90.0-97.1) | 97.2 (92.4-99.2)   | 63.6 (49.3-77.0)                                    | 85.3 (75.4-91.6) | 92.5 (80.5-97.7)   |
| Malawi                             | 96.0 (93.4-97.8)                                    | 99.2 (98.6-99.5) | 99.7 (99.3-99.9)   | 90.3 (84.8-94.4)                                    | 97.8 (96.5-98.7) | 99.2 (98.1-99.7)   |
| Mozambique                         | 95.6 (91.3-98.2)                                    | 96.7 (94.3-98.3) | 96.8 (91.6-99.2)   | 87.9 (77.6-94.3)                                    | 90.5 (84.6-94.9) | 91.1 (77.7-97.6)   |
| Rwanda                             | 84.3 (73.2-91.5)                                    | 99.6 (99.3-99.8) | 100.0 (99.9-100.0) | 86.3 (77.1-92.7)                                    | 99.7 (99.4-99.9) | 100.0 (99.9-100.0) |
| Tanzania                           | 96.5 (92.0-98.8)                                    | 98.9 (98.0-99.5) | 99.4 (98.2-99.9)   | 91.0 (80.9-96.6)                                    | 97.1 (94.7-98.7) | 98.4 (95.3-99.7)   |
| Uganda                             | 94.4 (90.1-97.4)                                    | 96.7 (94.2-98.3) | 97.4 (93.5-99.3)   | 93.0 (87.5-96.7)                                    | 95.8 (92.7-97.8) | 96.7 (91.3-99.1)   |
| Zambia                             | 96.7 (93.3-98.6)                                    | 98.7 (97.6-99.4) | 99.2 (98.0-99.8)   | 89.5 (80.8-95.3)                                    | 95.7 (92.5-98.0) | 97.4 (93.5-99.3)   |
| Zimbabwe                           | 88.1 (74.9-96.0)                                    | 92.4 (85.7-96.7) | 93.0 (75.8-99.1)   | 87.5 (73.9-95.7)                                    | 92.0 (84.5-96.5) | 92.6 (74.4-99.0)   |
| <b>West and Central Africa</b>     |                                                     |                  |                    |                                                     |                  |                    |

|                                    |                  |                     |                     |                  |                    |                     |
|------------------------------------|------------------|---------------------|---------------------|------------------|--------------------|---------------------|
| Benin                              | 84.7 (67.2-94.5) | 89.2 (81.0-94.5)    | 90.6 (73.6-97.8)    | 71.8 (48.3-88.3) | 78.8 (67.2-87.2)   | 81.9 (54.3-95.3)    |
| Burkina Faso                       | 92.8 (85.1-97.3) | 99.5 (98.4-99.9)    | 99.9 (99.3-100.0)   | 70.6 (51.0-85.0) | 97.5 (92.3-99.4)   | 99.3 (96.3-100.0)   |
| Cameroon                           | 88.2 (80.3-94.2) | 96.3 (92.2-98.5)    | 98.2 (93.6-99.6)    | 63.7 (49.0-77.2) | 86.0 (73.9-93.4)   | 92.7 (78.3-98.5)    |
| Central African Republic           | 84.6 (72.7-92.7) | 90.3 (77.2-97.4)    | 91.6 (67.0-99.3)    | 54.9 (38.4-71.3) | 68.5 (43.0-88.4)   | 74.1 (32.2-96.8)    |
| Chad                               | 62.8 (45.9-78.1) | 86.8 (75.4-94.2)    | 93.6 (82.0-98.7)    | 32.0 (19.1-46.7) | 65.0 (46.7-80.2)   | 81.0 (55.0-95.0)    |
| Congo                              | 88.3 (75.2-96.5) | 96.7 (92.8-98.8)    | 98.2 (92.3-99.8)    | 73.7 (52.6-89.4) | 91.3 (83.2-96.3)   | 95.1 (82.8-99.4)    |
| Cote d'Ivoire                      | 89.3 (74.3-96.8) | 97.0 (92.8-98.9)    | 98.4 (93.7-99.8)    | 75.2 (48.9-90.9) | 92.1 (84.1-96.9)   | 95.7 (85.0-99.4)    |
| Democratic Republic of the Congo   | 88.5 (79.6-94.4) | 92.3 (86.7-96.1)    | 93.7 (84.0-98.4)    | 75.2 (60.8-86.3) | 82.5 (72.6-89.5)   | 85.7 (67.9-95.3)    |
| Ghana                              | 96.8 (93.7-98.6) | 99.4 (98.7-99.8)    | 99.7 (99.0-100.0)   | 90.1 (81.0-95.3) | 97.8 (95.4-99.1)   | 99.1 (96.7-99.9)    |
| Guinea                             | 94.5 (86.7-98.1) | 95.1 (91.0-97.6)    | 94.7 (83.9-98.9)    | 81.3 (61.3-92.9) | 82.8 (73.3-90.0)   | 82.1 (60.4-95.0)    |
| Liberia                            | 67.6 (36.0-89.9) | 99.4 (98.8-99.8)    | 100.0 (99.8-100.0)  | 44.8 (17.1-75.7) | 98.4 (96.8-99.4)   | 99.9 (99.5-100.0)   |
| Mali                               | 80.9 (67.2-90.4) | 93.9 (90.0-96.6)    | 97.1 (93.1-99.2)    | 51.3 (32.7-69.3) | 78.9 (67.4-87.9)   | 89.2 (74.7-96.6)    |
| Niger                              | 75.6 (58.7-87.3) | 97.8 (94.8-99.3)    | 99.5 (98.1-99.9)    | 34.7 (19.7-51.7) | 88.0 (73.2-95.8)   | 97.2 (89.3-99.7)    |
| Nigeria                            | 65.6 (50.5-79.0) | 76.9 (65.8-85.4)    | 82.1 (62.5-93.4)    | 36.1 (22.4-51.4) | 49.4 (36.8-62.4)   | 58.4 (33.4-79.6)    |
| Sao Tome and Principe              | 91.9 (83.8-96.6) | 100.0 (100.0-100.0) | 100.0 (100.0-100.0) | 81.6 (68.5-91.6) | 100.0 (99.9-100.0) | 100.0 (100.0-100.0) |
| Senegal                            | 92.4 (87.1-96.0) | 99.0 (98.3-99.4)    | 99.7 (99.4-99.9)    | 75.0 (62.3-85.3) | 95.8 (93.5-97.6)   | 98.8 (97.4-99.6)    |
| Sierra Leone                       | 79.4 (67.5-88.5) | 99.3 (98.6-99.6)    | 99.9 (99.8-100.0)   | 62.6 (46.7-76.6) | 98.3 (97.0-99.2)   | 99.8 (99.5-100.0)   |
| The Gambia                         | 97.8 (94.5-99.3) | 99.4 (98.9-99.7)    | 99.7 (99.1-99.9)    | 96.0 (90.2-98.8) | 98.9 (97.9-99.5)   | 99.5 (98.3-99.9)    |
| Togo                               | 94.1 (86.3-98.0) | 87.9 (78.3-94.0)    | 79.1 (49.2-94.9)    | 72.3 (48.4-88.3) | 53.8 (36.7-70.3)   | 41.2 (13.7-74.9)    |
| <b>Latin America and Caribbean</b> |                  |                     |                     |                  |                    |                     |
| Dominican Republic                 | 71.2 (35.9-92.8) | 99.9 (99.6-100.0)   | 100.0 (100.0-100.0) | 65.1 (29.8-89.0) | 99.8 (99.5-100.0)  | 100.0 (100.0-100.0) |
| Haiti                              | 82.0 (61.0-94.0) | 93.3 (86.9-97.4)    | 95.9 (86.2-99.5)    | 75.8 (51.7-91.1) | 90.5 (82.1-95.7)   | 94.2 (79.6-99.1)    |
| Honduras                           | 87.7 (68.3-97.0) | 98.4 (95.0-99.7)    | 99.2 (95.4-100.0)   | 80.9 (56.3-94.6) | 97.3 (92.0-99.4)   | 98.8 (92.3-100.0)   |
| <b>Central and Eastern Europe</b>  |                  |                     |                     |                  |                    |                     |
| Albania                            | 96.0 (87.9-99.3) | 89.9 (80.3-95.8)    | 78.4 (41.3-96.5)    | 96.0 (87.5-99.3) | 90.0 (81.9-95.0)   | 78.5 (42.4-95.9)    |
| Armenia                            | 86.5 (70.1-95.4) | 99.9 (99.9-100.0)   | 100.0 (100.0-100.0) | 83.5 (66.1-93.6) | 99.9 (99.8-100.0)  | 100.0 (100.0-100.0) |
| Kyrgyzstan                         | 96.5 (91.4-99.1) | 99.9 (99.8-100.0)   | 100.0 (100.0-100.0) | 83.9 (65.3-94.6) | 99.4 (98.9-99.7)   | 99.9 (99.7-100.0)   |
| Tajikistan                         | 84.2 (73.3-92.0) | 95.5 (91.5-98.0)    | 98.0 (94.3-99.5)    | 72.7 (58.4-84.5) | 91.2 (83.2-95.9)   | 95.9 (88.4-99.0)    |

LMICs, low-and middle-income countries; CrI, credible interval

Table S5: Coverage of at least four ANC visits among adolescent mothers according area of residence in 54 LMICs, 2000-2030

| Country                            | Urban (predicted coverage, proportion with 95% CrI) |                  |                   | Rural (predicted coverage, proportion with 95% CrI) |                  |                  |
|------------------------------------|-----------------------------------------------------|------------------|-------------------|-----------------------------------------------------|------------------|------------------|
|                                    | 2000                                                | 2018             | 2030              | 2000                                                | 2018             | 2030             |
| <b>South Asia</b>                  |                                                     |                  |                   |                                                     |                  |                  |
| Afghanistan                        | 9.0 (2.3-21.4)                                      | 39.1 (25.1-55.6) | 70.1 (38.1-93.0)  | 3.1 (0.8-7.9)                                       | 17.2 (10.5-26.0) | 46.0 (16.9-80.7) |
| Bangladesh                         | 26.3 (17.8-36.2)                                    | 42.7 (32.1-54.0) | 55.2 (33.4-75.6)  | 11.9 (7.6-17.8)                                     | 22.0 (15.7-30.2) | 32.6 (16.6-53.8) |
| India                              | 43.7 (29.2-60.9)                                    | 69.7 (58.3-80.5) | 82.1 (66.4-92.9)  | 23.9 (14.4-37.2)                                    | 48.2 (35.7-60.9) | 65.4 (44.1-83.5) |
| Maldives                           | 99.9 (99.7-99.9)                                    | 99.9 (99.7-99.9) | 99.8 (99.5-100.0) | 85.9 (73.1-94.0)                                    | 85.2 (77.2-91.3) | 83.5 (63.8-94.6) |
| Nepal                              | 30.2 (22.1-39.2)                                    | 79.2 (71.9-85.2) | 94.2 (89.4-97.2)  | 13.3 (9.2-18.2)                                     | 57.4 (47.5-67.0) | 85.3 (74.6-92.3) |
| Pakistan                           | 28.0 (15.5-44.4)                                    | 56.7 (45.9-67.3) | 74.3 (53.7-88.7)  | 13.9 (6.5-24.7)                                     | 34.8 (24.6-45.4) | 55.0 (31.9-76.1) |
| <b>East Asia and the Pacific</b>   |                                                     |                  |                   |                                                     |                  |                  |
| Cambodia                           | 30.1 (22.2-38.6)                                    | 93.9 (90.4-96.4) | 99.4 (98.6-99.8)  | 12.1 (8.3-16.2)                                     | 83.1 (75.5-88.6) | 98.1 (95.9-99.2) |
| Indonesia                          | 78.8 (69.6-86.2)                                    | 89.7 (85.3-93.3) | 93.7 (88.1-97.2)  | 65.3 (54.2-75.1)                                    | 81.4 (74.3-87.4) | 88.2 (78.3-94.7) |
| Laos                               | 25.5 (8.4-53.8)                                     | 70.2 (58.8-79.9) | 88.9 (72.1-97.2)  | 9.6 (2.6-25.2)                                      | 41.1 (29.3-53.5) | 71.5 (42.2-90.7) |
| Myanmar                            | 51.6 (13.8-87.6)                                    | 72.2 (58.3-83.4) | 80.2 (48.7-96.1)  | 22.8 (3.0-63.2)                                     | 37.1 (23.9-52.9) | 51.7 (16.9-84.3) |
| Papua New Guinea                   | 40.1 (7.1-81.7)                                     | 53.6 (37.5-68.3) | 63.2 (30.1-89.3)  | 35.5 (5.7-80.0)                                     | 47.9 (32.4-62.6) | 58.2 (26.2-87.4) |
| Philippines                        | 69.2 (57.5-78.8)                                    | 84.2 (77.7-89.2) | 90.2 (81.9-95.6)  | 59.8 (48.0-71.5)                                    | 77.8 (70.0-84.7) | 85.8 (75.3-93.6) |
| Timor-Leste                        | 34.0 (14.1-58.0)                                    | 82.3 (72.5-89.7) | 95.0 (85.8-99.0)  | 24.8 (9.6-46.9)                                     | 74.5 (62.9-84.1) | 92.3 (77.7-98.4) |
| Vietnam                            | 45.6 (33.3-59.3)                                    | 75.4 (64.9-83.7) | 87.4 (74.6-94.8)  | 18.9 (11.8-27.6)                                    | 46.0 (33.2-58.7) | 66.5 (43.6-83.8) |
| <b>Eastern and Southern Africa</b> |                                                     |                  |                   |                                                     |                  |                  |
| Angola                             | 63.2 (43.3-80.3)                                    | 78.0 (66.4-86.4) | 84.5 (65.6-95.1)  | 26.7 (13.2-44.7)                                    | 41.9 (30.3-53.9) | 54.6 (30.2-78.2) |
| Burundi                            | 24.7 (10.3-44.1)                                    | 54.4 (41.0-67.1) | 73.6 (49.2-91.0)  | 19.5 (8.2-36.2)                                     | 46.6 (36.2-58.4) | 67.6 (43.0-87.3) |
| Comoros                            | 28.6 (8.0-59.0)                                     | 50.2 (28.7-72.1) | 64.4 (21.4-94.1)  | 24.0 (6.8-51.9)                                     | 44.1 (25.1-63.4) | 59.5 (18.4-92.6) |
| Ethiopia                           | 31.5 (23.1-40.2)                                    | 66.7 (55.7-76.3) | 84.0 (71.2-92.2)  | 6.5 (4.3-9.2)                                       | 23.3 (16.0-31.7) | 45.2 (27.6-64.0) |
| Kenya                              | 42.3 (29.9-54.2)                                    | 56.8 (46.0-66.9) | 67.7 (46.8-83.6)  | 35.2 (24.9-47.2)                                    | 49.4 (38.5-60.2) | 61.0 (39.8-79.4) |
| Lesotho                            | 79.1 (68.3-86.9)                                    | 77.8 (66.2-86.1) | 76.6 (54.3-91.1)  | 65.4 (52.6-76.5)                                    | 63.6 (51.1-75.1) | 62.7 (38.6-83.5) |
| Madagascar                         | 44.0 (28.0-60.9)                                    | 70.9 (48.8-86.7) | 82.4 (49.7-97.3)  | 26.9 (16.6-41.4)                                    | 53.8 (32.3-75.1) | 70.3 (32.1-94.3) |
| Malawi                             | 63.2 (54.7-71.2)                                    | 48.4 (39.7-57.2) | 39.4 (26.2-55.3)  | 53.4 (44.6-61.9)                                    | 38.6 (29.7-47.3) | 30.4 (18.0-44.1) |
| Mozambique                         | 64.3 (52.6-75.2)                                    | 61.9 (51.6-71.3) | 60.5 (43.8-75.5)  | 46.9 (35.2-59.0)                                    | 44.2 (35.2-53.1) | 43.1 (27.1-58.8) |
| Rwanda                             | 10.8 (7.5-15.0)                                     | 57.2 (45.8-67.2) | 87.3 (76.8-94.0)  | 7.8 (5.2-10.9)                                      | 48.3 (37.3-58.8) | 82.8 (69.5-91.5) |
| Tanzania                           | 68 (55.1-79.4)                                      | 61.9 (52.3-71.0) | 57.8 (39.3-74.5)  | 51.8 (37.8-65.0)                                    | 45.0 (35.6-55.2) | 41.2 (23.9-60.4) |
| Uganda                             | 49.9 (39.9-60.3)                                    | 65.0 (54.4-75.3) | 73.7 (57.0-86.8)  | 40.1 (30.9-50.4)                                    | 55.6 (43.9-66.9) | 65.5 (46.3-81.3) |
| Zambia                             | 60.8 (50.0-71.3)                                    | 51.8 (41.4-62.4) | 46.2 (29.9-63.5)  | 62.0 (50.8-72.4)                                    | 53.2 (42.9-62.9) | 47.6 (31.0-63.9) |
| Zimbabwe                           | 56.8 (41.2-71.0)                                    | 70.4 (61.1-78.8) | 77.9 (60.0-90.4)  | 54.8 (41.0-68.5)                                    | 68.6 (59.2-77.0) | 76.4 (57.7-89.5) |

**West and Central Africa**

|                                  |                  |                  |                  |                  |                  |                  |
|----------------------------------|------------------|------------------|------------------|------------------|------------------|------------------|
| Benin                            | 64.1 (49.3-76.3) | 54.8 (45.3-64.1) | 51.3 (32.8-70.1) | 51.7 (37.8-64.9) | 42.0 (34.0-49.9) | 38.9 (22.8-57.4) |
| Burkina Faso                     | 23.8 (14.4-34.7) | 62.3 (43.6-78.9) | 82.1 (58.0-95.6) | 12.3 (7.3-18.5)  | 43.1 (26.7-61.4) | 68.6 (38.8-90.5) |
| Cameroon                         | 70.2 (56.8-81.9) | 68.5 (56.0-79.2) | 67.3 (42.5-85.5) | 46.9 (33.1-61.3) | 44.8 (33.2-56.3) | 44.4 (23.0-67.4) |
| Central African Republic         | 43.5 (31.3-55.2) | 51.6 (33.1-68.8) | 57.4 (28.2-82.1) | 20.2 (13.6-28.6) | 26.4 (14.8-40.7) | 32.4 (12.2-58.7) |
| Chad                             | 24.9 (15.8-36.0) | 61.4 (47.9-73.3) | 81.4 (63.6-92.6) | 8.5 (4.9-13.4)   | 31.0 (21.7-41.9) | 56.3 (33.7-77.8) |
| Congo                            | 75.4 (63.5-85.4) | 83.8 (76.3-90.2) | 87.7 (74.4-95.9) | 59.0 (43.7-72.2) | 70.8 (60.0-79.7) | 77.4 (57.7-91.0) |
| Cote d'Ivoire                    | 40.0 (8.7-81.3)  | 58.9 (42.6-74.9) | 69.8 (33.8-93.3) | 27.5 (4.7-68.6)  | 43.0 (30.7-56.3) | 56.7 (21.8-87.0) |
| Democratic Republic of the Congo | 44.5 (30.4-59.3) | 55.3 (44.9-64.2) | 63.3 (44.6-79.1) | 32.3 (21.2-45.0) | 42.3 (33.3-51.8) | 51.0 (32.5-70.6) |
| Ghana                            | 72.0 (62.3-80.5) | 87.6 (80.3-92.4) | 92.9 (84.3-97.3) | 56.6 (45.4-66.5) | 78.1 (68.7-86.1) | 87.0 (73.2-95.1) |
| Guinea                           | 72.8 (59.0-82.8) | 62.1 (53.1-71.0) | 54.0 (36.6-71.7) | 48.9 (34.6-62.9) | 36.5 (28.5-45.8) | 29.7 (16.5-46.6) |
| Liberia                          | 57.3 (38.4-75.3) | 86.8 (80.6-91.3) | 94.7 (87.6-98.2) | 41.3 (24.4-60.1) | 77.2 (67.7-84.9) | 90.3 (78.5-96.6) |
| Mali                             | 47.9 (37.2-58.5) | 62.9 (54.5-70.5) | 72.4 (59.1-83.0) | 22.8 (15.8-30.7) | 35.1 (27.6-42.9) | 45.9 (31.7-60.3) |
| Niger                            | 17.9 (8.7-30.6)  | 60.8 (42.3-77.4) | 83.8 (58.7-96.4) | 8.2 (3.8-15.0)   | 39.1 (22.9-55.9) | 69.4 (35.7-91.5) |
| Nigeria                          | 55.4 (45.9-65.5) | 62.8 (55.8-70.2) | 67.7 (54.4-79.4) | 25.4 (18.6-32.9) | 31.5 (24.9-38.3) | 36.8 (24.6-51.0) |
| Sao Tome and Principe            | 66.9 (43.4-84.9) | 86.3 (77.3-92.7) | 91.9 (76.8-98.6) | 60.1 (35.5-80.7) | 82.2 (71.7-90.3) | 89.5 (70.6-97.9) |
| Senegal                          | 42.2 (29.5-55.8) | 61.2 (53.7-68.1) | 72.5 (57.6-84.2) | 27.7 (17.4-39.6) | 45.1 (37.5-53.4) | 58.2 (41.8-74.1) |
| Sierra Leone                     | 52.8 (35.5-69.6) | 82.7 (75.5-88.4) | 92.2 (83.1-97.4) | 46.8 (28.8-63.7) | 78.9 (70.3-85.4) | 90.3 (79.4-96.4) |
| The Gambia                       | 59.5 (45.3-73.0) | 74.1 (65.3-81.0) | 81.5 (66.1-91.1) | 61.8 (47.4-74.8) | 75.9 (68.1-82.8) | 82.8 (68.6-91.9) |
| Togo                             | 51.9 (27.3-76.8) | 74.9 (61.0-85.4) | 83.8 (55.8-96.5) | 14.7 (4.9-32.1)  | 31.1 (17.6-46.3) | 48.0 (14.9-80.2) |

**Latin America and Caribbean**

|                    |                  |                  |                  |                  |                  |                  |
|--------------------|------------------|------------------|------------------|------------------|------------------|------------------|
| Dominican Republic | 84.4 (71.1-92.9) | 94.8 (90.0-97.5) | 97.3 (91.4-99.5) | 82.8 (69.0-92.2) | 94.2 (89.2-97.2) | 97.0 (89.9-99.5) |
| Haiti              | 46.5 (30.0-62.0) | 62.8 (51.3-73.8) | 73.2 (51.9-88.6) | 39.0 (24.3-54.8) | 55.3 (43.4-66.3) | 67.0 (44.4-84.3) |
| Honduras           | 84.4 (71.7-92.0) | 87.3 (77.6-94.0) | 87.7 (66.8-97.5) | 78.2 (64.5-88.1) | 82.0 (68.9-91.3) | 82.8 (56.7-96.6) |

**Central and Eastern Europe**

|            |                  |                  |                   |                  |                  |                  |
|------------|------------------|------------------|-------------------|------------------|------------------|------------------|
| Albania    | 67.2 (48.3-83.0) | 70.9 (59.5-80.1) | 73.5 (52.3-87.9)  | 67.2 (49.1-82.4) | 71.0 (61.4-78.6) | 73.7 (53.9-87.4) |
| Armenia    | 81.3 (71.0-89.2) | 97.2 (95.7-98.4) | 99.3 (98.3-99.8)  | 61.7 (47.6-74.3) | 92.8 (89.5-95.3) | 98.1 (95.8-99.3) |
| Kyrgyzstan | 98.5 (96.1-99.5) | 99.7 (99.5-99.8) | 99.9 (99.6-100.0) | 65.4 (38.9-85.3) | 88.9 (84.3-92.4) | 95.2 (88.1-98.6) |
| Tajikistan | 61.8 (34.1-84.7) | 79.9 (71.1-87.4) | 87.1 (71.7-96.5)  | 42.3 (18.6-68.9) | 63.1 (50.2-74.5) | 74.9 (49.4-91.7) |

LMICs, low-and middle-income countries; CrI, credible interval

Table S6: Rate of changes for coverage of single and four ANC visits between 2000 and 2030

| Country                            | Rate of change for ANC1 |         |         | Rate of change for ANC4 |        |        |
|------------------------------------|-------------------------|---------|---------|-------------------------|--------|--------|
|                                    | National                | Urban   | Rural   | National                | Urban  | Rural  |
| <b>South Asia</b>                  |                         |         |         |                         |        |        |
| Afghanistan                        | 77.43                   | 75.80   | 79.66   | 90.41                   | 89.51  | 90.02  |
| Bangladesh                         | 49.06                   | 47.95   | 55.50   | 70.12                   | 69.07  | 74.23  |
| India                              | 23.81                   | 26.10   | 36.92   | 68.63                   | 70.19  | 78.97  |
| Maldives                           | -6.16                   | -8.47   | -17.00  | -2.02                   | -2.02  | -2.62  |
| Nepal                              | 71.50                   | 76.98   | 87.57   | 89.20                   | 90.80  | 95.97  |
| Pakistan                           | 53.37                   | 54.64   | 64.92   | 80.91                   | 79.42  | 83.38  |
| <b>East Asia and the Pacific</b>   |                         |         |         |                         |        |        |
| Cambodia                           | 56.06                   | 55.26   | 65.93   | 89.11                   | 88.31  | 92.60  |
| Indonesia                          | 13.37                   | 10.51   | 13.17   | 28.16                   | 21.93  | 26.28  |
| Laos                               | 75.88                   | 75.40   | 82.34   | 91.93                   | 90.14  | 92.22  |
| Myanmar                            | 40.25                   | 38.41   | 42.33   | 50.38                   | 46.00  | 46.79  |
| Papua New Guinea                   | 35.50                   | 36.83   | 41.82   | 42.76                   | 42.57  | 46.07  |
| Philippines                        | 13.32                   | 12.16   | 16.08   | 36.04                   | 32.02  | 38.80  |
| Timor-Leste                        | -1.71                   | -1.81   | -2.06   | 75.40                   | 72.58  | 77.37  |
| Vietnam                            | 35.78                   | 22.63   | 20.99   | 80.89                   | 71.49  | 69.02  |
| <b>Eastern and Southern Africa</b> |                         |         |         |                         |        |        |
| Angola                             | -22.14                  | -20.42  | -25.95  | 61.31                   | 58.31  | 61.71  |
| Burundi                            | 19.30                   | 16.10   | 21.50   | 78.29                   | 76.02  | 78.83  |
| Comoros                            | 24.16                   | 21.68   | 27.39   | 60.40                   | 56.25  | 58.40  |
| Ethiopia                           | 71.79                   | 71.70   | 77.97   | 85.48                   | 84.80  | 87.58  |
| Kenya                              | 20.55                   | 18.10   | 24.57   | 42.10                   | 37.38  | 41.04  |
| Lesotho                            | 11.09                   | 11.71   | 17.71   | 21.55                   | 18.47  | 20.38  |
| Madagascar                         | 23.59                   | 19.40   | 22.73   | 56.75                   | 52.39  | 55.05  |
| Malawi                             | 7.68                    | 8.28    | 12.61   | -38.71                  | -36.68 | -40.40 |
| Mozambique                         | 11.41                   | 11.94   | 17.53   | -8.84                   | -8.27  | -9.09  |
| Rwanda                             | 10.71                   | 9.51    | 12.71   | 90.73                   | 88.96  | 90.33  |
| Tanzania                           | 9.97                    | 8.75    | 11.40   | 5.53                    | 5.08   | 5.63   |
| Uganda                             | 6.92                    | 6.50    | 9.20    | 47.86                   | 46.49  | 51.02  |
| Zambia                             | 7.12                    | 7.02    | 10.37   | -24.85                  | -21.55 | -22.97 |
| Zimbabwe                           | 5.84                    | 5.50    | 7.35    | 36.28                   | 32.77  | 35.52  |
| <b>West and Central Africa</b>     |                         |         |         |                         |        |        |
| Benin                              | 4.24                    | 3.80    | 4.80    | -35.22                  | -31.36 | -35.31 |
| Burkina Faso                       | 40.44                   | 38.54   | 46.95   | 84.32                   | 82.48  | 85.00  |
| Cameroon                           | 13.63                   | 11.99   | 14.93   | -1.82                   | -1.66  | -1.78  |
| Central African Republic           | 21.48                   | 20.60   | 26.10   | 32.04                   | 30.00  | 32.04  |
| Chad                               | 53.88                   | 51.79   | 57.47   | 80.81                   | 79.39  | 81.24  |
| Congo                              | 24.09                   | 21.13   | 25.76   | 30.59                   | 26.57  | 29.23  |
| Cote d'Ivoire                      | 23.14                   | 21.87   | 28.00   | 52.78                   | 50.15  | 52.94  |
| DRC                                | 14.19                   | 12.85   | 16.00   | 8.97                    | 8.15   | 9.05   |
| Ghana                              | 8.85                    | 9.06    | 13.54   | 42.18                   | 34.13  | 36.72  |
| Guinea                             | 4.24                    | 4.12    | 5.84    | -26.37                  | -24.43 | -26.50 |
| Liberia                            | 55.86                   | 55.26   | 63.86   | 55.16                   | 51.49  | 54.45  |
| Mali                               | 36.02                   | 34.69   | 41.48   | 46.08                   | 44.32  | 46.41  |
| Niger                              | 65.04                   | 60.79   | 65.72   | 91.42                   | 89.75  | 90.23  |
| Nigeria                            | 32.88                   | 26.85   | 28.28   | 25.84                   | 21.24  | 21.62  |
| Sao Tome and Principe              | 4.80                    | 8.31    | 21.34   | 40.84                   | 38.15  | 44.95  |
| Senegal                            | 19.98                   | 18.04   | 23.33   | 52.49                   | 49.63  | 53.34  |
| Sierra Leone                       | 31.96                   | 31.16   | 39.58   | 53.06                   | 50.49  | 54.84  |
| The Gambia                         | 3.61                    | 2.91    | 3.51    | 18.97                   | 15.64  | 15.83  |
| Togo                               | -152.01                 | -132.47 | -166.15 | 47.17                   | 43.90  | 47.26  |
| <b>Latin America and Caribbean</b> |                         |         |         |                         |        |        |
| Dominican Republic                 | 47.30                   | 43.30   | 47.70   | 20.02                   | 16.70  | 20.85  |
| Haiti                              | 16.09                   | 15.66   | 21.86   | 49.54                   | 43.47  | 46.84  |
| Honduras                           | 16.10                   | 15.18   | 20.46   | -29.59                  | -25.27 | -32.47 |
| <b>Central and Eastern Europe</b>  |                         |         |         |                         |        |        |
| Albania                            | -73.25                  | -63.70  | -87.67  | 27.70                   | 24.79  | 28.82  |

|            |       |       |       |       |       |       |
|------------|-------|-------|-------|-------|-------|-------|
| Armenia    | 18.50 | 17.40 | 20.20 | 43.73 | 37.98 | 33.57 |
| Kyrgyzstan | 21.50 | 18.40 | 22.00 | 18.90 | 14.57 | 17.98 |
| Tajikistan | 21.30 | 24.79 | 37.22 | 64.40 | 65.81 | 73.03 |

---

ANC, antenatal care; ANC1, single antenatal visit; ANC4, four antenatal visits

**Table S7: Coverage of at least single antenatal visit among adolescent mothers according to wealth quintile in LMICs, 2000-2030**

| Country                            | Predicted coverage, proportion (95% CrI) |                   |                  |                    |                    |                     |
|------------------------------------|------------------------------------------|-------------------|------------------|--------------------|--------------------|---------------------|
|                                    | 2000                                     |                   | 2018             |                    | 2030               |                     |
|                                    | Q1                                       | Q5                | Q1               | Q5                 | Q1                 | Q5                  |
| <b>South Asia</b>                  |                                          |                   |                  |                    |                    |                     |
| Afghanistan                        | 10.9 (0.8-40.9)                          | 43.1 (4.9-87.0)   | 45.0 (20.8-69.8) | 85.8 (64.3-96.3)   | 73.1 (19.4-98.7)   | 93.6 (62.6-99.9)    |
| Bangladesh                         | 22.1 (9.3-40.0)                          | 74.6 (53.6-90.2)  | 49.0 (28.7-69.5) | 91.0 (79.6-97)     | 66.7 (25.6-93.0)   | 94.7 (78.2-99.4)    |
| India                              | 56.3 (23.7-84.7)                         | 89.3 (69.0-97.9)  | 73.8 (50.8-89.7) | 95.2 (86.7-98.8)   | 79.7 (40.4-97.8)   | 96.0 (82.2-99.7)    |
| Maldives                           | 99.4 (97.3-99.9)                         | 99.9 (99.6-100.0) | 99.6 (98.9-99.9) | 99.9 (99.7-100.0)  | 99.3 (96.4-100.0)  | 99.9 (99.2-100.0)   |
| Nepal                              | 16.3 (7.1-30.9)                          | 57.9 (34.0-78.9)  | 74.4 (57.4-87.9) | 95.5 (90.3-98.4)   | 94.1 (82.2-98.9)   | 99.2 (97.2-99.9)    |
| Pakistan                           | 32.6 (10.0-65.6)                         | 70.2 (36.5-93.8)  | 75.5 (56.3-89.0) | 94.4 (86.8-98.2)   | 89.9 (65.9-98.6)   | 97.9 (92.3-99.8)    |
| <b>East Asia and the Pacific</b>   |                                          |                   |                  |                    |                    |                     |
| Cambodia                           | 22.8 (11.2-39.2)                         | 84.4 (69.3-94.1)  | 98.0 (95.4-99.3) | 99.9 (99.7-100.0)  | 99.9 (99.7-100.0)  | 100.0 (100.0-100.0) |
| Indonesia                          | 85.9 (70.9-95.1)                         | 98.9 (97.1-99.7)  | 89.4 (78.7-96.0) | 99.2 (97.8-99.7)   | 89.7 (67.6-98.3)   | 99.2 (96.3-99.9)    |
| Laos                               | 10.1 (4.2-19.4)                          | 45.8 (23.4-69.4)  | 65.3 (44.8-82.6) | 93.3 (85.6-97.7)   | 91.7 (77.2-98.4)   | 98.8 (96.0-99.8)    |
| Myanmar                            | 42.6 (2.1-94.6)                          | 90.2 (41.0-99.9)  | 77.1 (54.4-92.3) | 99.1 (97.3-99.9)   | 85.5 (37.6-99.6)   | 99.3 (95.2-100.0)   |
| Papua New Guinea                   | 39.7 (1.2-95.2)                          | 61.9 (3.8-99.0)   | 70.0 (46.0-88.6) | 89.5 (69.7-97.7)   | 81.5 (32.1-99.1)   | 93.4 (65.1-99.8)    |
| Philippines                        | 85.7 (69.2-95.0)                         | 99.7 (99.1-99.9)  | 84.3 (69.9-93.4) | 99.6 (99.2-99.9)   | 81.6 (50.9-96.4)   | 99.5 (98.2-99.9)    |
| Timor-Leste                        | 63.1 (19.8-94.5)                         | 87.0 (52.6-99.1)  | 77.0 (54.0-92.4) | 94.1 (84.2-98.5)   | 79.1 (27.9-99.0)   | 93.7 (67.7-99.8)    |
| Vietnam                            | 42.8 (24.3-62.5)                         | 99.4 (98.6-99.8)  | 95.4 (89.5-98.5) | 100.0 (99.9-100.0) | 99.4 (97.8-99.9)   | 100.0 (100.0-100.0) |
| <b>Eastern and Southern Africa</b> |                                          |                   |                  |                    |                    |                     |
| Angola                             | 81.2 (57.1-95.4)                         | 96.3 (87.5-99.4)  | 70.7 (48.6-86.5) | 93.8 (83.4-98.2)   | 60.1 (15.9-93.2)   | 88.2 (53.4-99.0)    |
| Burundi                            | 79.6 (64.5-89.8)                         | 87.2 (73.9-95.0)  | 98.8 (97.5-99.5) | 99.3 (98.3-99.8)   | 99.8 (99.4-100.0)  | 99.9 (99.6-100.0)   |
| Comoros                            | 57.3 (34.2-78.1)                         | 87.1 (71.4-95.9)  | 88.1 (70.6-97.1) | 97.3 (90.8-99.6)   | 94.5 (74.0-99.7)   | 98.7 (92.1-99.9)    |
| Ethiopia                           | 10.1 (4.2-19.2)                          | 45.2 (23.1-68.7)  | 50.1 (28.9-70.1) | 87.5 (72.2-95.7)   | 79.4 (48.9-95.3)   | 96.2 (86.3-99.5)    |
| Kenya                              | 61.9 (42.7-78.9)                         | 85.1 (72.1-93.2)  | 95.7 (91.6-98.3) | 98.7 (97.0-99.6)   | 99.2 (97.4-99.9)   | 99.8 (99.1-100.0)   |
| Lesotho                            | 74.3 (48.6-91.2)                         | 88.1 (70.4-97.1)  | 96.5 (90.9-99.0) | 98.7 (96.2-99.7)   | 98.8 (93.7-99.9)   | 99.6 (97.8-100.0)   |
| Madagascar                         | 55.5 (35.3-74.5)                         | 90.8 (81.4-96.5)  | 77.4 (60.9-89.2) | 96.5 (92.8-98.6)   | 86.5 (64.3-97.0)   | 98.0 (93.7-99.7)    |
| Malawi                             | 82.4 (70.4-90.7)                         | 94.9 (90.4-97.8)  | 97.5 (95.5-98.7) | 99.4 (98.7-99.7)   | 99.3 (98.1-99.8)   | 99.8 (99.5-100.0)   |
| Mozambique                         | 80.1 (61.7-92.5)                         | 96.8 (92.3-99.1)  | 86.8 (75.3-94.0) | 98.1 (95.7-99.3)   | 88.9 (70.4-97.7)   | 98.4 (94.2-99.7)    |
| Rwanda                             | 86.9 (74.6-94.3)                         | 82.9 (66.7-93.4)  | 99.8 (99.5-99.9) | 99.7 (99.3-99.9)   | 100.0 (99.9-100.0) | 100.0 (99.9-100.0)  |
| Tanzania                           | 86.5 (68.5-95.8)                         | 94.9 (86.2-98.7)  | 97.0 (94.3-98.7) | 99.0 (97.6-99.7)   | 98.7 (95.6-99.8)   | 99.5 (98.2-99.9)    |
| Uganda                             | 93.4 (86.7-97.3)                         | 93.0 (85.8-97.3)  | 95.9 (92.0-98.3) | 95.7 (91.2-98.3)   | 96.6 (89.6-99.3)   | 96.4 (89.0-99.3)    |
| Zambia                             | 83.4 (66.7-93.6)                         | 98.4 (95.7-99.5)  | 93.3 (86.2-97.2) | 99.4 (98.7-99.8)   | 95.9 (87.3-99.3)   | 99.7 (98.8-99.9)    |
| Zimbabwe                           | 80.9 (57.4-94.7)                         | 90.7 (75.9-97.8)  | 91.8 (83.3-96.8) | 96.3 (91.6-98.8)   | 94.0 (76.0-99.5)   | 97.3 (88.0-99.8)    |
| <b>West and Central Africa</b>     |                                          |                   |                  |                    |                    |                     |
| Benin                              | 64.0 (36.6-86.5)                         | 95.1 (87.5-99.0)  | 67.7 (50.9-81.8) | 96.1 (91.2-98.5)   | 70.0 (33.3-93.5)   | 95.9 (85.1-99.5)    |
| Burkina Faso                       | 46.5 (23.9-72.1)                         | 92.8 (82.3-98.1)  | 97.8 (92.4-99.6) | 99.9 (99.5-100.0)  | 99.7 (97.8-100.0)  | 100.0 (99.9-100.0)  |

|                                    |                  |                   |                  |                     |                    |                     |
|------------------------------------|------------------|-------------------|------------------|---------------------|--------------------|---------------------|
| Cameroon                           | 54.7 (35.8-73.3) | 94.3 (87.5-98.0)  | 82.9 (67.4-92.7) | 98.5 (96.1-99.6)    | 91.4 (72.4-98.6)   | 99.3 (97.0-99.9)    |
| Central African Republic           | 40.8 (21.3-61.4) | 87.1 (72.9-95.2)  | 63.2 (30.8-88.6) | 93.9 (81.5-98.9)    | 73.0 (22.9-97.8)   | 95.2 (74.2-99.8)    |
| Chad                               | 16.5 (7.7-29.6)  | 58.7 (36.1-79.2)  | 49.9 (27.4-71.5) | 87.4 (73.6-95.8)    | 72.8 (34.8-93.5)   | 94.5 (81.1-99.2)    |
| Congo                              | 59.7 (30.6-84.2) | 94.4 (82.7-98.9)  | 92.4 (84.2-97.4) | 99.4 (98.2-99.8)    | 97.4 (89.6-99.8)   | 99.8 (99.0-100.0)   |
| Cote d'Ivoire                      | 47.8 (16.5-78.0) | 92.7 (78.4-98.5)  | 95.4 (88.8-98.4) | 99.7 (99.1-99.9)    | 99.2 (96.5-99.9)   | 99.9 (99.8-100.0)   |
| Democratic Republic of the Congo   | 62.7 (42.0-81.3) | 91.9 (83.2-96.9)  | 76.5 (59.6-87.5) | 95.7 (90.6-98.4)    | 82.7 (57.9-95.6)   | 96.9 (89.3-99.4)    |
| Ghana                              | 82.6 (66.6-93.0) | 98.8 (97.0-99.6)  | 98.7 (96.7-99.6) | 99.9 (99.8-100.0)   | 99.7 (98.7-100.0)  | 100.0 (99.9-100.0)  |
| Guinea                             | 71.7 (45.9-89.5) | 95.8 (89.1-99.0)  | 74.2 (57.7-86.6) | 96.5 (92.3-98.7)    | 73.9 (41.9-93.7)   | 96.0 (86.9-99.4)    |
| Liberia                            | 23.7 (4.4-57.8)  | 76.6 (41.1-95.8)  | 97.2 (93.1-99.2) | 99.8 (99.5-100.0)   | 99.8 (99.1-100.0)  | 100.0 (100.0-100.0) |
| Mali                               | 38.6 (19.4-62.5) | 79.4 (60.2-92.3)  | 69.3 (51.8-83.3) | 93.6 (87.7-97.3)    | 83.6 (60.0-95.5)   | 97.0 (90.9-99.3)    |
| Niger                              | 21.4 (8.9-41.4)  | 64.6 (39.9-84.4)  | 81.0 (59.1-94.3) | 96.6 (89.6-99.3)    | 95.4 (78.5-99.7)   | 99.2 (96.0-100.0)   |
| Nigeria                            | 21.5 (10.2-37.5) | 78.3 (59.3-90.3)  | 38.6 (23.2-55.1) | 89.5 (81.2-95.1)    | 52.7 (23.5-79.6)   | 93.2 (82.3-98.4)    |
| Sao Tome and Principe              | 94.3 (86.9-98.0) | 99.7 (99.1-99.9)  | 99.7 (99.3-99.9) | 100.0 (100.0-100.0) | 100.0 (99.8-100.0) | 100.0 (100.0-100.0) |
| Senegal                            | 53.4 (34.1-71.0) | 96.8 (93.5-98.7)  | 95.3 (91.8-97.5) | 99.8 (99.7-99.9)    | 99.2 (98.1-99.8)   | 100.0 (99.9-100.0)  |
| Sierra Leone                       | 55.2 (35.4-75.4) | 78.6 (60.0-89.9)  | 97.5 (94.8-99.0) | 99.2 (98.3-99.7)    | 99.7 (99.0-100.0)  | 99.9 (99.7-100.0)   |
| The Gambia                         | 92.1 (80.7-97.9) | 98.8 (96.3-99.7)  | 99.0 (97.9-99.6) | 99.9 (99.7-100.0)   | 99.7 (98.8-100.0)  | 100.0 (99.8-100.0)  |
| Togo                               | 76.1 (48.7-92.8) | 99.5 (98.5-99.9)  | 35.7 (18.0-56.3) | 97.3 (93.6-99.1)    | 16.7 (2.5-48.8)    | 89.7 (63.8-98.7)    |
| <b>Latin America and Caribbean</b> |                  |                   |                  |                     |                    |                     |
| Dominican Republic                 | 60.6 (22.8-91.0) | 92.5 (74.3-99.2)  | 99.7 (99.0-99.9) | 100.0 (99.9-100.0)  | 100.0 (99.9-100.0) | 100.0 (100.0-100.0) |
| Haiti                              | 59.9 (28.4-86.2) | 87.6 (65.8-97.5)  | 88.3 (75.6-95.4) | 97.5 (93.9-99.3)    | 94.6 (79.8-99.5)   | 98.9 (94.9-99.9)    |
| Honduras                           | 73.8 (40.3-94.0) | 93.4 (79.0-98.9)  | 95.7 (86.0-99.2) | 99.2 (96.9-99.9)    | 97.7 (86.2-100.0)  | 99.5 (96.9-100.0)   |
| <b>Central and Eastern Europe</b>  |                  |                   |                  |                     |                    |                     |
| Albania                            | 98.6 (95.1-99.8) | 99.9 (99.7-100.0) | 94.6 (88.4-98.0) | 99.7 (99.3-99.9)    | 83.5 (47.6-98.0)   | 98.8 (94.3-99.9)    |
| Armenia                            | 95.6 (87.8-98.9) | 99.5 (98.5-99.9)  | 99.7 (99.4-99.9) | 100.0 (99.9-100.0)  | 99.9 (99.8-100.0)  | 100.0 (100.0-100.0) |
| Kyrgyzstan                         | 94.5 (85.2-98.7) | 98.8 (96.2-99.7)  | 99.4 (98.8-99.8) | 99.9 (99.7-100.0)   | 99.8 (99.4-100.0)  | 100.0 (99.9-100.0)  |
| Tajikistan                         | 67.1 (44.6-83.3) | 89.2 (76.8-96.1)  | 84.6 (71.4-93.7) | 95.8 (89.8-98.6)    | 90.7 (72.6-98.1)   | 97.5 (91.6-99.6)    |

Q1, Poorest wealth quintile; Q5, Richest wealth quintile; CrI, credible intervals



**Table S8: Coverage of at least four antenatal visits among adolescent mothers according to wealth quintile in LMICs, 2000-2030**

| Country                            | Predicted coverage, proportion (95% CrI) |                  |                  |                  |                  |                    |
|------------------------------------|------------------------------------------|------------------|------------------|------------------|------------------|--------------------|
|                                    | 2000                                     |                  | 2018             |                  | 2030             |                    |
|                                    | Q1                                       | Q5               | Q1               | Q5               | Q1               | Q5                 |
| <b>South Asia</b>                  |                                          |                  |                  |                  |                  |                    |
| Afghanistan                        | 2.1 (0.1-9.6)                            | 10.1 (1.0-36.5)  | 11.9 (3.9-25.3)  | 43.4 (22.9-65.7) | 39.9 (4.2-87.0)  | 72.4 (22.3-98.0)   |
| Bangladesh                         | 6.0 (2.3-12.4)                           | 28.3 (14.0-46.3) | 15.4 (7.1-27.9)  | 52.7 (35.1-69.5) | 28.5 (7.2-61.9)  | 67.8 (34.2-90.7)   |
| India                              | 15.7 (4.3-35.0)                          | 52.3 (24.8-78.1) | 37.8 (17.9-61.6) | 78.9 (60.9-90.8) | 57.1 (19.1-88.5) | 87.8 (62.1-98.1)   |
| Maldives                           | 69.6 (35.3-92.2)                         | 99.5 (98.3-99.9) | 79.7 (60.4-91.7) | 99.7 (99.3-99.9) | 81.8 (46.1-97.4) | 99.7 (98.7-100.0)  |
| Nepal                              | 5.0 (2.2-9.8)                            | 25.7 (14.0-40.9) | 43.4 (27.1-60.2) | 83.3 (72.4-91.2) | 81.2 (58.0-93.6) | 96.5 (90.6-99.1)   |
| Pakistan                           | 7.4 (1.9-18.3)                           | 40.4 (17.3-68.3) | 24.8 (12.5-41.8) | 74.5 (58.3-86.5) | 47.0 (17.3-78.9) | 87.4 (67.2-97.5)   |
| <b>East Asia and the Pacific</b>   |                                          |                  |                  |                  |                  |                    |
| Cambodia                           | 5.2 (2.3-9.6)                            | 28.3 (16.5-42.8) | 77.4 (60.0-89.7) | 96.1 (91.9-98.5) | 97.9 (93.4-99.7) | 99.7 (99.0-100.0)  |
| Indonesia                          | 54.3 (34.5-73.4)                         | 88.8 (78.5-95.1) | 73.8 (57.0-86.7) | 95.1 (90.8-97.9) | 82.2 (57.4-95.8) | 96.9 (91.1-99.3)   |
| Laos                               | 4.0 (0.2-17.2)                           | 21.5 (2.4-61.9)  | 30.4 (14.0-51.5) | 76.6 (58.8-89.5) | 69.1 (24.8-96.2) | 93.2 (72.7-99.5)   |
| Myanmar                            | 18.6 (0.7-73.5)                          | 48.5 (4.4-94.3)  | 33.7 (13.3-57.1) | 75.2 (51.7-89.6) | 52.3 (7.7-94.5)  | 82.7 (36.0-99.0)   |
| Papua New Guinea                   | 22.3 (0.7-82.3)                          | 41.4 (2.4-94.1)  | 38.0 (17.4-62.1) | 66.9 (42.5-84.5) | 56.3 (10.1-92.5) | 78.2 (32.0-97.8)   |
| Philippines                        | 45.0 (25.8-64.6)                         | 88.7 (78.0-95.1) | 66.9 (47.1-81.8) | 95.3 (90.8-97.8) | 77.5 (47.2-93.9) | 97.0 (91.2-99.3)   |
| Timor-Leste                        | 19.2 (3.2-51.7)                          | 41.6 (11.4-79.4) | 66.7 (43.4-85.1) | 87.2 (74.6-94.8) | 87.5 (56.7-98.9) | 95.7 (81.6-99.7)   |
| Vietnam                            | 3.5 (1.1-7.9)                            | 83.1 (67.3-93.1) | 60.7 (37.1-80.6) | 99.6 (98.9-99.9) | 93.9 (79.5-99.2) | 100.0 (99.8-100.0) |
| <b>Eastern and Southern Africa</b> |                                          |                  |                  |                  |                  |                    |
| Angola                             | 33.6 (9.5-65.2)                          | 73.4 (40.6-93.1) | 44.4 (23.3-67.4) | 83.4 (71.1-92.0) | 52.4 (14.6-87.8) | 85.4 (57.0-97.8)   |
| Burundi                            | 12.8 (2.0-37.8)                          | 30.2 (6.8-63.4)  | 41.8 (22.2-64.4) | 69.9 (49.7-84.3) | 67.4 (25.7-94.8) | 85.6 (54.9-98.1)   |
| Comoros                            | 13.7 (0.9-50.5)                          | 36.6 (5.1-80.8)  | 33.5 (9.3-66.0)  | 67.5 (36.6-90.1) | 53.8 (5.2-97.3)  | 77.7 (18.2-99.4)   |
| Ethiopia                           | 2.4 (1.1-5.0)                            | 18.1 (9.6-31.3)  | 15.1 (7.2-27.2)  | 60.3 (41.7-78.3) | 39.9 (14.4-70.3) | 83.5 (61.5-95.9)   |
| Kenya                              | 29.0 (13.6-48.7)                         | 47.1 (27.3-67.5) | 44.5 (25.6-63.7) | 63.8 (45.0-80.7) | 55.4 (21.4-86.7) | 71.9 (36.3-93.6)   |
| Lesotho                            | 50.6 (27.9-75.4)                         | 73.6 (55.0-87.9) | 65.0 (42.1-83.9) | 83.4 (66.1-94.1) | 71.5 (31.8-94.7) | 86.0 (53.9-98.3)   |
| Madagascar                         | 19.1 (6.2-43.2)                          | 50.1 (25.9-74.3) | 45.2 (14.1-78.9) | 76.4 (41.6-94.9) | 62.0 (10.4-97.0) | 83.6 (32.9-99.4)   |
| Malawi                             | 46.8 (31.4-63.1)                         | 63.1 (48.4-76.7) | 36.6 (21.4-52.6) | 52.8 (36.2-69.3) | 31.3 (11.6-55.8) | 46.0 (20.4-73.2)   |
| Mozambique                         | 36.3 (17.8-57.5)                         | 69.1 (48.9-84.9) | 36.2 (21.0-52.8) | 69.6 (53.5-82.4) | 37.0 (14.2-65.6) | 68.8 (39.1-89.3)   |
| Rwanda                             | 5.9 (2.6-10.5)                           | 10.9 (5.6-18.7)  | 43.8 (25.0-63.8) | 60.0 (40.5-77.1) | 79.0 (49.1-94.9) | 87.6 (66.6-97.2)   |
| Tanzania                           | 44.2 (22.1-66.8)                         | 66.9 (45.7-84.7) | 42.0 (25.1-59.8) | 65.4 (47.3-79.9) | 41.2 (15.7-71.1) | 63.3 (32.1-86.7)   |
| Uganda                             | 33.4 (18.1-51.4)                         | 48.4 (31.2-65.4) | 54.5 (35.0-73.1) | 69.1 (51.8-83.6) | 67.3 (36.6-89.5) | 78.9 (52.4-94.3)   |
| Zambia                             | 58.4 (38.9-76.8)                         | 65.4 (46.9-81.5) | 50.0 (30.4-67.9) | 57.4 (39.1-72.8) | 44.7 (17.5-72.8) | 51.7 (23.3-77.1)   |
| Zimbabwe                           | 47.6 (22.7-71.8)                         | 65.0 (39.8-84.1) | 64.7 (45.7-80.8) | 79.4 (64.8-89.8) | 73.0 (38.2-94.0) | 84.2 (58.8-97.0)   |
| <b>West and Central Africa</b>     |                                          |                  |                  |                  |                  |                    |
| Benin                              | 40.7 (17.7-66.9)                         | 78.5 (60.0-91.7) | 31.0 (17.8-47.8) | 71.8 (58.3-82.9) | 27.6 (7.9-59.4)  | 65.3 (33.7-89.5)   |
| Burkina Faso                       | 7.1 (2.4-16.0)                           | 28.3 (12.3-48.0) | 36.1 (11.7-68.3) | 72.7 (43.4-91.7) | 63.8 (13.9-96.0) | 87.4 (49.5-99.3)   |

|                                    |                  |                  |                  |                   |                   |                     |
|------------------------------------|------------------|------------------|------------------|-------------------|-------------------|---------------------|
| Cameroon                           | 35 (16.4-58.4)   | 77.4 (58.0-90.3) | 38.8 (20.3-61.8) | 80.3 (64.4-91.1)  | 42.4 (11.0-79.9)  | 80.1 (47.7-96.3)    |
| Central African Republic           | 15.2 (6.1-28.3)  | 48.7 (29.5-67.9) | 25.1 (7.6-53.1)  | 62.3 (32.5-86.2)  | 34.9 (5.5-79.9)   | 68.6 (24.7-95.6)    |
| Chad                               | 0.2 (0.1-0.7)    | 6.9 (2.4-15.8)   | 15.1 (5.3-31.1)  | 83.1 (69.7-93.0)  | 71.8 (32.7-94.9)  | 98.5 (94.8-99.8)    |
| Congo                              | 43.9 (20.4-69.1) | 83.4 (66.0-93.7) | 69.0 (49.1-85.7) | 93.8 (87.5-97.3)  | 79.8 (48.0-96.5)  | 96.1 (85.3-99.4)    |
| Cote d'Ivoire                      | 19.2 (0.9-75.2)  | 45.9 (4.3-94.0)  | 37.5 (16.3-63.1) | 75.4 (56.0-89.1)  | 57.3 (9.0-95.8)   | 83.7 (37.3-99.0)    |
| Democratic Republic of the Congo   | 24.2 (9.2-46.3)  | 52.5 (28.2-76.2) | 37.7 (22.2-55.2) | 68.6 (52.9-81.6)  | 49.0 (19.2-80.5)  | 76.0 (45.6-94.1)    |
| Ghana                              | 30.5 (14.8-48.4) | 94.8 (89.8-97.7) | 84.9 (71.1-93.9) | 99.6 (99.1-99.9)  | 96.3 (87.7-99.5)  | 99.9 (99.7-100.0)   |
| Guinea                             | 35.9 (15.8-60.5) | 76.5 (57.5-90.9) | 26.6 (14.5-41.4) | 69.0 (54.2-81.5)  | 22.8 (6.9-48.6)   | 62.1 (32.8-86.1)    |
| Liberia                            | 28.2 (8.1-56.5)  | 59.2 (26.9-83.8) | 72.7 (52.9-87.5) | 91.5 (82.4-96.5)  | 88.8 (65.9-98.5)  | 96.8 (87.2-99.6)    |
| Mali                               | 16.1 (7.5-29.0)  | 47.9 (30.9-65.7) | 25.8 (15.2-40.2) | 62.9 (46.9-76.6)  | 35.2 (15.3-60.7)  | 71.2 (46.3-88.7)    |
| Niger                              | 5.6 (1.2-15.2)   | 16.6 (4.9-36.6)  | 32.7 (10.6-60.0) | 61.1 (27.3-86.5)  | 63.1 (13.5-96.2)  | 81.9 (31.4-99.0)    |
| Nigeria                            | 12.8 (6.2-22.4)  | 66.7 (49.9-80.2) | 20.0 (11.7-30.9) | 77.6 (65.8-86.4)  | 27.3 (10.5-49.9)  | 82.4 (63.4-93.5)    |
| Sao Tome and Principe              | 42.0 (10.6-77.3) | 78.0 (43.9-95.4) | 79.6 (55.5-93.3) | 95.8 (89.8-98.9)  | 89.5 (55.8-99.5)  | 97.9 (88.8-99.9)    |
| Senegal                            | 18.5 (7.7-35.9)  | 51.7 (29.4-74.1) | 37.4 (25.4-51.4) | 74.7 (62.4-84.4)  | 53.7 (27.8-79.5)  | 84.2 (63.6-95.2)    |
| Sierra Leone                       | 39.3 (16.1-68.5) | 57.6 (30.6-81.3) | 74.0 (57.1-86.7) | 86.2 (73.8-93.7)  | 86.6 (61.0-97.7)  | 93.2 (74.7-99.0)    |
| The Gambia                         | 52.3 (27.2-76.0) | 68.4 (44.3-86.3) | 71.1 (53.8-85.1) | 83.4 (72.7-91.2)  | 79.4 (52.5-95.0)  | 88.4 (70.1-97.4)    |
| Togo                               | 0.1 (0.0-0.4)    | 15.5 (1.7-50.0)  | 6.6 (1.4-18.4)   | 91.9 (80.5-97.9)  | 54.0 (6.5-96.2)   | 99.1 (94.7-100.0)   |
| <b>Latin America and Caribbean</b> |                  |                  |                  |                   |                   |                     |
| Dominican Republic                 | 55.6 (22.1-84.3) | 93.9 (81.2-98.8) | 93.8 (83.8-98.4) | 99.6 (98.8-99.9)  | 98.0 (89.2-99.9)  | 99.9 (99.3-100.0)   |
| Haiti                              | 28.6 (10.2-54.3) | 58.9 (30.1-81.6) | 47.6 (27.7-68.5) | 77.3 (62.0-89.3)  | 60.7 (25.1-89.8)  | 84.0 (56.8-97.2)    |
| Honduras                           | 54.3 (23.3-82.6) | 87.1 (69.5-96.2) | 79.4 (55.4-93.9) | 95.8 (88.8-99.0)  | 86.3 (45.7-99.2)  | 97.0 (84.6-99.9)    |
| <b>Central and Eastern Europe</b>  |                  |                  |                  |                   |                   |                     |
| Albania                            | 62.0 (29.4-87.1) | 90.7 (74.8-97.9) | 58.4 (36.0-77.5) | 90.2 (81.7-95.4)  | 55.1 (18.3-87.5)  | 87.1 (60.5-97.6)    |
| Armenia                            | 29.9 (11.0-55.3) | 87.1 (72.2-95.4) | 98.0 (95.3-99.3) | 99.9 (99.8-100.0) | 99.9 (99.6-100.0) | 100.0 (100.0-100.0) |
| Kyrgyzstan                         | 61.2 (21.7-90.2) | 95.7 (83.9-99.5) | 81.9 (68.5-91.2) | 98.8 (97.7-99.5)  | 87.7 (61.8-98.3)  | 99.2 (96.9-99.9)    |
| Tajikistan                         | 27.7 (3.9-67.8)  | 62.6 (19.0-92.7) | 49.8 (28.2-72.2) | 84.4 (70.3-93.3)  | 65.0 (21.6-95.2)  | 89.6 (62.0-99.0)    |

Q1, Poorest wealth quintile; Q5, Richest wealth quintile; CrI, credible intervals

**Table S9: Changes in the magnitude of socio-economic inequality in access to antenatal care, 2000-2030**

| Country                            | Slope index of inequality (95% CrI) |                  |                  |                 |                  |                 |
|------------------------------------|-------------------------------------|------------------|------------------|-----------------|------------------|-----------------|
|                                    | ANC1                                |                  |                  | ANC4            |                  |                 |
|                                    | 2000                                | 2018             | 2030             | 2000            | 2018             | 2030            |
| <b>South Asia</b>                  |                                     |                  |                  |                 |                  |                 |
| Afghanistan                        | 41.7 (31.5-51.8)                    | 53.7 (41.5-65.8) | 27.7 (19.2-36.1) | 10.7(2.8-18.5)  | 36.1(15.9-56.2)  | 40.2(30.2-50.1) |
| Bangladesh                         | 66.0 (50.8-81.2)                    | 53.6(47.3-59.9)  | 36.4(29-43.7)    | 32.4(22.6-42.1) | 36.5(25.2-47.7)  | 36.9(28.2-45.5) |
| India                              | 41.3 (35.9-46.6)                    | 27(19.4-34.6)    | 20.6(15.4-25.8)  | 47.2(39.8-54.5) | 46.7(43.1-50.3)  | 39.1(35.6-42.6) |
| Maldives                           | .6 (.04-1.2)                        | .4 (.2-.6)       | .8(.2-1.4)       | 66(37.2-94.8)   | 2(-.4-4.4)       | .1(-.1-.3)      |
| Nepal                              | 51.8 (35.3-68.3)                    | 26.4(18.4-34.3)  | 6.3(3.5-9.1)     | 26(7.3-44.7)    | 43.9(20.5-67.2)  | 46.5(30.4-62.5) |
| Pakistan                           | 49.3 (44.1-54.5)                    | 24.1(14.7-33.4)  | 9.6(5.1-14.6)    | 45.7(40.1-51.2) | 48.9(38.7-59.1)  | 45.5(34.1-56.9) |
| <b>East Asia and the Pacific</b>   |                                     |                  |                  |                 |                  |                 |
| Cambodia                           | 77.0 (57.3-96.6)                    | 2.3(1-3.6)       | .1(-.1-.3)       | 24.6(9.5-39.7)  | 43.5(34.6-52.4)  | 28.4(25.8-30.9) |
| Indonesia                          | 16.5 (6.5-26.4)                     | 12.2(4.3-20.1)   | 11.7(4.5-18.8)   | 20.6(7.6-33.6)  | 33.9(20.7-47)    | 22.4(17.4-27.4) |
| Laos                               | 46.2 (32.2-60.2)                    | 35.4(21.6-49.1)  | 8.6(3.7-13.5)    | 27.5(7.5-47.4)  | 23(16-30.1)      | 2.2(1.1-3.4)    |
| Myanmar                            | 59.4 (42.1-76.8)                    | 27.7(16.4-39)    | 16.7(11.5-21.9)  | 50.9(46.3-55.6) | 50.1(46.2-54)    | 44.6(40.8-48.4) |
| Papua New Guinea                   | 28.6 (25.1-32.1)                    | 25.3(19.3-31.3)  | 15.1(11.2-19.1)  | 39.5(19.4-59.5) | 44(27.7-60.2)    | 40.3(29.1-51.6) |
| Philippines                        | 17.4 (5.7-29.1)                     | 18.3(6.1-30.5)   | 21.3(8.3-34.4)   | 7.5(1.2-13.8)   | 78.1(45.9-110.2) | 27.8(-7.1-62.6) |
| Timor-Leste                        | 31.3 (29.6-33)                      | 23.1(19.1-27.1)  | 20.1(18.1-22.1)  | 25.4(15.6-35.2) | 39.1(31-47.1)    | 27.1(21.3-32.8) |
| Vietnam                            | 71.3 (29.8-112.7)                   | 5.6(-.5-11.7)    | .8(-.2-1.8)      | 46.6(41.3-51.8) | 29(21.3-36.7)    | 18.6(13-24.2)   |
| <b>Eastern and Southern Africa</b> |                                     |                  |                  |                 |                  |                 |
| Angola                             | 19.2 (5.8-32.5)                     | 29.6(10.4-48.8)  | 37.1(17.1-57.1)  | 32.6(21.4-43.7) | 46.9(40.1-53.7)  | 32.4(28.5-36.2) |
| Burundi                            | 11.5 (-12.9-35.8)                   | .8(-.7-2.2)      | .1(-.2-.5)       | 33.5(16.4-50.6) | 36.8(22.9-50.8)  | 32.1(22.7-41.5) |
| Comoros                            | 37.6 (28.5-46.6)                    | 11.4(6.6-16.2)   | 4.9(2.9-6.9)     | 44.4(31.3-57.4) | 6.7(2.1-11.3)    | 2.1(-.8-3.4)    |
| Ethiopia                           | 41.3 (12.5-70.1)                    | 46.2(40.3-52.1)  | 21.5(18.9-24.1)  | 18.9(1.8-35.9)  | 53.9(26.5-81.3)  | 53.6(44.9-62.4) |
| Kenya                              | 31.7 (17-46.3)                      | 4.3(1.8-6.7)     | .7(.2-1.3)       | 81.3(62.5-100)  | 18(2.9-33)       | 4.4(-3.8-8.4)   |
| Lesotho                            | 18.1 (6.7-29.4)                     | 2.7(.7-4.6)      | .9(.4-1.4)       | 48.4(42.3-54.5) | 50.3(40.4-60.2)  | 46.5(35.1-57.8) |
| Madagascar                         | 43.3 (41.1-45.5)                    | 23.3(19.6-27)    | 14.3(11.5-17.1)  | 36.5(23.4-49.5) | 35.6(29.3-42)    | 27(23.5-30.4)   |
| Malawi                             | 16.6 (8.2-25.5)                     | 2.5(1.1-3.9)     | .7(.2-1.1)       | 40(36.4-43.6)   | 19.8(14.1-25.2)  | 12.9(9.7-16.1)  |
| Mozambique                         | 21.1 (15.8-26.40)                   | 13.8(9.7-17.9)   | 11.4(8.2-14.6)   | 43.9(29-58.8)   | 49.3(41.5-57)    | 36.9(27.2-46.7) |
| Rwanda                             | -2.9 (-21.6-15.7)                   | -.1(-.5-.4)      | 0                | 40.8(23.6-58)   | 24.4(9.5-39.2)   | 16.3(5.6-26.9)  |
| Tanzania                           | 10.3 (8-12.5)                       | 2.3(1.8-2.8)     | 1.1(.8-1.3)      | 20.7(10.4-31)   | 22.2(13.3-31)    | 18.7(12.3-25)   |
| Uganda                             | -.3 (-2.4-1.8)                      | -.3(-1.4-.8)     | -.4(-1.3-.6)     | 41(31.4-50.5)   | 20.2(9.8-30.5)   | 13.9(7-20.8)    |
| Zambia                             | 18.5 (8-28.9)                       | 7.3(2.7-11.8)    | 4.4(1.7-7.1)     | 21.6(12.5-30.6) | 53.6(42.6-64.5)  | 27.6(13.5-41.7) |
| Zimbabwe                           | 11.8 (9.7-13.9)                     | 5.6(4.8-6.4)     | 4.3(3.4-5.1)     | 28.1(14.7-41.4) | 22.9(14.4-31.4)  | 18.2(11.3-25.1) |
| <b>West and Central Africa</b>     |                                     |                  |                  |                 |                  |                 |
| Benin                              | 40.0 (31.5-48.5)                    | 35.2(25.2-45.2)  | 32.4(24.6-40.2)  | 37.5(28.8-46.2) | 23.3(19.9-26.6)  | 10.2(7.9-12.4)  |
| Burkina Faso                       | 58.5 (56.6-60.5)                    | 2.3(1.3-3.3)     | .4(.2-.5)        | 36.8(20.1-53.5) | 37(30.4-43..6)   | 25(21.4-28.6)   |

|                                    |                  |                 |                  |                   |                 |                 |
|------------------------------------|------------------|-----------------|------------------|-------------------|-----------------|-----------------|
| Cameroon                           | 49.9 (37.7-62)   | 19.3(10.2-28.3) | 9.8(4.8-14.8)    | 19.7(10.6-28.7)   | 19.4(9.3-29.5)  | 17.8(8.1-27.4)  |
| Central African Republic           | 57.8 (55.6-60)   | 36.2(28.8-43.6) | 25.2(19.9-30.4)  | 35.2(3.4-67)      | 22.8(-.8-46.4)  | 20.4(.4-40.4)   |
| Chad                               | 52.4 (36.4-68.3) | 47(41.9-52)     | 27.5(20.8-34.2)  | 38.2(19.3-57.1)   | 45(28.9-61.1)   | 44(33-55)       |
| Congo                              | 44.8 (35.7-53.8) | 8.7(4.3-13.1)   | 3.2(1.4-4.9)     | 40.6(31.3-49.8)   | 41.2(31.9-50.5) | 39.1(30.4-47.8) |
| Cote d'Ivoire                      | 57.8 (43.9-71.7) | 5.3(1.7-9)      | 1(.1-1.8)        | 34.7(22.1-47.3)   | 50.3(42.3-58.2) | 35.8(30.6-40.9) |
| Democratic Republic of the Congo   | 36.9 (29-44.7)   | 23.5(15.9-31.1) | 17.3(11.2-23.3)  | 24.4(10.7-38)     | 48.7(40.3-57)   | 18(9.2-26.7)    |
| Ghana                              | 19.6 (9.1-30)    | 1.5(.5-2.4)     | .4(.01-.7)       | 12.4(2.5-22.2)    | 33.9(19.1-48.7) | 21.9(16.6-27.1) |
| Guinea                             | 29.6 (20.2-39)   | 26.7(16.8-36.5) | 26.7(18.3-35.1)  | 64.8(47.4-82.2)   | 69.8(62.5-77.2) | 66.7(57.7-75.6) |
| Liberia                            | 66.8 (58.2-75.4) | 2.9(.9-4.9)     | .1(.04-.3)       | 40.6(16.1-65)     | 61.2(49.2-73.2) | 49.1(42.7-55.4) |
| Mali                               | 49.7 (43-563)    | 29.4(25-33.8)   | 16.6(12.9-20.2)  | 22.1(14.3-29.9)   | 34.7(26.7-42.7) | 26.3(21.4-31.2) |
| Niger                              | 49.8 (-1.6-11.4) | 17.4(16-18.9)   | 4.3(3.8-4.7)     | 52.6(39.6-65.6)   | 34.2(17.9-50.6) | 23.6(11-36.1)   |
| Nigeria                            | 72.5 (62.3-82.8) | 64.9(54.8-75.1) | 51.1(37.5-64.7)  | 5.6(2.2-9.1)      | 18.6(11.4-25.8) | 10(6.4-13.5)    |
| Sao Tome and Principe              | 6.8 (1.5-12)     | .4(.01-.7)      | 0                | 45.1(33-57.2)     | 21.4(19.3-23.5) | 11.6(10.3-12.8) |
| Senegal                            | 55.8 (28.4-83.2) | 5.5(.8-10.2)    | 1(.3-1.6)        | 40.2(28-52.3)     | 44.9(39-50.8)   | 36.7(30.3-43)   |
| Sierra Leone                       | 30.7 (18.9-42.5) | 2.1(.9-3.3)     | .3(.1-.4)        | 22.4(11.1-33.7)   | 15.4(11-19.7)   | 8.3(6.2-10.5)   |
| The Gambia                         | 8.5 (6-11)       | 1.2(.8-1.6)     | .5(.2-.7)        | 42.2(30.3-54)     | 42.5(37.2-47.2) | 28.7(23.8-33.6) |
| Togo                               | 27.4 (15.6-39.2) | 76(71.9-80.1)   | 86.6(36.3-136.9) | 27.5(15.7-39.2)   | 28.4(15.6-41.1) | 26.8(14.3-39.2) |
| <b>Latin America and Caribbean</b> |                  |                 |                  |                   |                 |                 |
| Dominican Republic                 | 41.2 (28.1-54.4) | .49 (.2-.5)     | 0                | 18.8(6.9-30.6)    | 14.4(6.9-21.8)  | 10.6(5.3-15.8)  |
| Haiti                              | 36.7 (25.8-47.5) | 11.7 (5.8-17.5) | 5.4(2.5-8.2)     | 27.4(12.9-41.9)   | 24.7(21.2-28.2) | 10(8.7-11.3)    |
| Honduras                           | 25.3 (17.1-33.4) | 4.2 (2.4-6)     | 2.1(1.2-3)       | 18.8(.2-37.4)     | 104(64.2-143.8) | 50(-15.7-115.7) |
| <b>Central and Eastern Europe</b>  |                  |                 |                  |                   |                 |                 |
| Albania                            | 1.6 (0.7-2.5)    | 6.1 (2.8-9.4)   | 19.3 (11.9-26.7) | 17.6(3.6-31.5)    | 17.4(5.9-28.8)  | 14(5.5-22.4)    |
| Armenia                            | 5.0 (1.7-8.2)    | .4 (.01-.7)     | .1(-.1-.3)       | 100.5(62.6-138.3) | 43.4(-4.8-91.6) | 6.2(-1.9-14.3)  |
| Kyrgyzstan                         | 5.7 (1.8-9.5)    | .7 (.2-1.1)     | .2(.1-.4)        | 8.2(-.717.1)      | 8.6(-1.1-18.2)  | 8.2(-1.4-17.8)  |
| Tajikistan                         | 28.7 (16.3-41.1) | 14.2 (7-21.3)   | 8.8(4.3-13.3)    | 22.6(8.6-36.6)    | 19.1(9.3-28.9)  | 14.7(7.3-22)    |

ANC1, at least single antenatal visit; ANC4, at four antenatal visits from skilled health provider; CrI, Credible Intervals

Table S10: Posterior mean difference by considering with and without country level predictors for single ANC visit

| Country                          | Mean difference with and without country level predictors |       |       |       |       |       |       |
|----------------------------------|-----------------------------------------------------------|-------|-------|-------|-------|-------|-------|
|                                  | 2000                                                      | 2005  | 2010  | 2015  | 2020  | 2025  | 2030  |
| Afghanistan                      | -0.80                                                     | -0.80 | -0.10 | 1.00  | 1.50  | 1.30  | 0.90  |
| Albania                          | 0.30                                                      | 0.40  | 0.50  | 0.50  | 0.70  | 0.60  | 0.50  |
| Angola                           | 0.20                                                      | 0.40  | 0.40  | 0.50  | 0.40  | 0.10  | -0.30 |
| Armenia                          | 0.30                                                      | 0.10  | 0.00  | 0.00  | 0.00  | 0.00  | 0.00  |
| Bangladesh                       | -0.50                                                     | 0.00  | 0.50  | 0.90  | 1.20  | 1.40  | 1.50  |
| Benin                            | 0.50                                                      | 0.60  | 0.70  | 0.80  | 0.70  | 0.70  | 0.50  |
| Burkina Faso                     | 1.20                                                      | 0.20  | -0.20 | -0.20 | -0.20 | -0.10 | -0.10 |
| Burundi                          | 0.60                                                      | 0.20  | 0.00  | -0.10 | 0.00  | -0.10 | 0.00  |
| Cambodia                         | 0.00                                                      | 0.20  | 0.20  | 0.10  | 0.10  | 0.00  | 0.00  |
| Cameroon                         | -0.10                                                     | -0.10 | 0.00  | 0.10  | 0.10  | 0.20  | 0.10  |
| Central African Republic         | 0.60                                                      | 0.50  | 0.20  | 0.10  | 0.00  | -0.10 | -0.20 |
| Chad                             | -0.10                                                     | 0.10  | 0.30  | 0.50  | 0.70  | 0.70  | 0.70  |
| Comoros                          | 0.30                                                      | 0.20  | 0.00  | -0.10 | -0.10 | -0.20 | -0.20 |
| Congo                            | 0.20                                                      | 0.20  | 0.20  | 0.20  | 0.20  | 0.20  | 0.30  |
| Cote d'Ivoire                    | 0.30                                                      | 0.20  | 0.20  | 0.20  | 0.10  | 0.10  | 0.10  |
| Democratic Republic of the Congo | -0.30                                                     | -0.20 | -0.10 | -0.20 | -0.10 | -0.30 | -0.40 |
| Dominican Republic               | -0.40                                                     | -0.10 | 0.00  | 0.00  | 0.00  | 0.00  | 0.00  |
| Ethiopia                         | 0.10                                                      | 0.20  | 0.50  | 0.60  | 0.60  | 0.50  | 0.40  |
| Ghana                            | -0.30                                                     | -0.10 | 0.00  | 0.00  | 0.00  | 0.00  | 0.10  |
| Guinea                           | -0.10                                                     | -0.10 | -0.20 | -0.20 | -0.10 | -0.20 | -0.20 |
| Haiti                            | 0.50                                                      | 0.20  | -0.10 | -0.30 | -0.50 | -0.60 | -0.70 |
| Honduras                         | -0.50                                                     | -0.30 | -0.10 | -0.10 | 0.00  | 0.00  | -0.10 |
| India                            | -0.40                                                     | -0.50 | -0.40 | -0.40 | -0.40 | -0.50 | -0.60 |
| Indonesia                        | -0.10                                                     | -0.20 | -0.20 | -0.20 | -0.30 | -0.20 | -0.20 |
| Kenya                            | -0.10                                                     | 0.00  | -0.10 | 0.00  | -0.10 | -0.10 | -0.10 |
| Kyrgyzstan                       | 0.30                                                      | 0.00  | -0.10 | -0.10 | 0.00  | 0.00  | 0.00  |
| Laos                             | 0.10                                                      | 0.10  | 0.20  | 0.20  | 0.20  | 0.10  | 0.00  |
| Lesotho                          | 0.30                                                      | 0.10  | 0.00  | -0.10 | -0.10 | -0.10 | -0.10 |
| Liberia                          | -1.80                                                     | -0.90 | -0.10 | 0.10  | 0.00  | 0.10  | 0.00  |
| Madagascar                       | 0.90                                                      | 0.40  | 0.00  | -0.20 | -0.40 | -0.50 | -0.60 |
| Malawi                           | -0.10                                                     | -0.10 | 0.00  | 0.00  | 0.00  | 0.00  | 0.00  |
| Maldives                         | 0.00                                                      | 0.00  | 0.00  | 0.00  | 0.00  | 0.10  | 0.30  |
| Mali                             | -0.40                                                     | -0.20 | 0.00  | 0.20  | 0.20  | 0.30  | 0.30  |
| Mozambique                       | 0.10                                                      | 0.20  | 0.10  | 0.10  | 0.20  | 0.10  | 0.10  |
| Myanmar                          | 0.70                                                      | 0.40  | 0.20  | 0.00  | -0.20 | -0.60 | -1.00 |
| Nepal                            | 0.00                                                      | 0.10  | 0.30  | 0.20  | 0.20  | 0.10  | 0.10  |
| Niger                            | 1.50                                                      | 0.90  | 0.10  | -0.40 | -0.50 | -0.40 | -0.40 |
| Nigeria                          | -0.30                                                     | -0.30 | -0.40 | -0.60 | -0.60 | -0.70 | -0.90 |
| Pakistan                         | -0.10                                                     | -0.30 | -0.50 | -0.60 | -0.50 | -0.40 | -0.30 |
| Papua New Guinea                 | 5.00                                                      | 4.10  | 2.40  | 0.40  | -1.10 | -2.00 | -2.50 |
| Philippines                      | -0.10                                                     | -0.10 | -0.10 | 0.00  | 0.00  | 0.00  | 0.00  |
| Rwanda                           | -0.10                                                     | 0.00  | -0.10 | 0.00  | 0.00  | 0.00  | 0.00  |
| Sao Tome and Principe            | 0.00                                                      | 0.00  | 0.00  | 0.00  | 0.00  | 0.00  | 0.00  |
| Senegal                          | 0.10                                                      | 0.10  | 0.00  | 0.00  | -0.10 | 0.00  | 0.00  |
| Sierra Leone                     | 0.00                                                      | 0.10  | 0.10  | 0.10  | 0.00  | 0.10  | 0.00  |

|                        |       |       |       |       |       |       |       |
|------------------------|-------|-------|-------|-------|-------|-------|-------|
| Tajikistan             | -0.40 | -0.10 | -0.10 | 0.00  | 0.00  | -0.10 | -0.10 |
| Tanzania               | 0.10  | 0.10  | 0.00  | -0.10 | 0.00  | 0.00  | 0.00  |
| The Gambia             | -0.10 | 0.00  | 0.00  | 0.00  | -0.10 | 0.00  | 0.00  |
| Timor-Leste            | -1.00 | -0.40 | 0.00  | 0.30  | 0.60  | 0.50  | 0.50  |
| Togo                   | -0.30 | -0.30 | -0.20 | -0.10 | 0.10  | 0.10  | 0.20  |
| Uganda                 | 0.00  | 0.00  | 0.00  | 0.00  | 0.00  | 0.10  | 0.00  |
| Vietnam                | -0.40 | -0.30 | -0.20 | -0.10 | 0.00  | -0.10 | 0.00  |
| Zambia                 | -0.10 | 0.00  | 0.00  | 0.00  | 0.00  | 0.00  | 0.00  |
| Zimbabwe               | 0.00  | 0.00  | -0.20 | -0.30 | -0.40 | -0.60 | -0.60 |
| All countries (median) | 0.00  | 0.00  | 0.00  | 0.00  | 0.00  | 0.00  | 0.00  |
| All countries (mean)   | 0.12  | 0.11  | 0.08  | 0.04  | 0.02  | -0.02 | -0.06 |

ANC visit, antenatal care visit

Table S11: Posterior mean difference by considering with and without country level predictors for at least four ANC visits

| Country                          | Mean difference with and without country level predictors |       |       |       |       |       |       |
|----------------------------------|-----------------------------------------------------------|-------|-------|-------|-------|-------|-------|
|                                  | 2000                                                      | 2005  | 2010  | 2015  | 2020  | 2025  | 2030  |
| Afghanistan                      | -1.10                                                     | -1.00 | -0.70 | 0.40  | 2.80  | 6.60  | 10.70 |
| Albania                          | 1.50                                                      | 1.00  | 0.60  | 0.30  | 0.20  | 0.30  | 0.50  |
| Angola                           | 0.10                                                      | 0.10  | 0.10  | 0.30  | 0.60  | 1.00  | 1.40  |
| Armenia                          | 0.30                                                      | 0.00  | 0.00  | 0.10  | 0.10  | 0.10  | 0.10  |
| Bangladesh                       | -0.30                                                     | -0.20 | 0.00  | 0.40  | 0.90  | 1.50  | 2.20  |
| Benin                            | -0.70                                                     | -0.70 | -0.60 | -0.30 | 0.20  | 1.10  | 2.30  |
| Burkina Faso                     | 0.30                                                      | -0.20 | -1.10 | -2.30 | -3.10 | -3.60 | -3.50 |
| Burundi                          | 1.30                                                      | 0.90  | 0.40  | -0.20 | -0.80 | -1.30 | -1.60 |
| Cambodia                         | 0.00                                                      | -0.20 | -0.50 | -0.60 | -0.40 | -0.20 | -0.10 |
| Cameroon                         | 0.20                                                      | 0.00  | -0.20 | -0.30 | -0.30 | -0.30 | -0.20 |
| Central African Republic         | 0.20                                                      | -0.30 | -0.70 | -1.00 | -1.40 | -1.70 | -1.80 |
| Chad                             | 0.00                                                      | 0.00  | -0.10 | -0.10 | -0.10 | -0.10 | 0.00  |
| Comoros                          | 0.40                                                      | 0.40  | 0.40  | 0.40  | 0.60  | 0.80  | 1.20  |
| Congo                            | -0.80                                                     | -0.60 | -0.30 | 0.10  | 0.50  | 1.00  | 1.50  |
| Cote d'Ivoire                    | 1.20                                                      | 0.90  | 0.50  | 0.00  | -0.60 | -1.00 | -1.30 |
| Democratic Republic of the Congo | 0.90                                                      | 0.50  | 0.10  | -0.10 | -0.30 | -0.30 | -0.10 |
| Dominican Republic               | 1.50                                                      | 0.50  | -0.10 | -0.30 | -0.40 | -0.40 | -0.40 |
| Ethiopia                         | -0.20                                                     | -0.20 | 0.00  | 0.10  | 0.50  | 1.10  | 1.70  |
| Ghana                            | -0.10                                                     | -0.20 | -0.20 | -0.20 | -0.20 | -0.20 | -0.10 |
| Guinea                           | 0.10                                                      | 0.10  | 0.10  | 0.00  | 0.00  | 0.00  | 0.10  |
| Haiti                            | 1.70                                                      | 0.70  | -0.20 | -0.90 | -1.40 | -1.70 | -1.60 |
| Honduras                         | 1.00                                                      | 0.40  | -0.30 | -0.80 | -1.30 | -1.80 | -2.20 |
| India                            | -0.40                                                     | -0.30 | -0.20 | 0.10  | 0.30  | 0.50  | 0.70  |
| Indonesia                        | -0.60                                                     | -0.50 | -0.40 | -0.10 | 0.00  | 0.20  | 0.30  |
| Kenya                            | 0.00                                                      | -0.40 | -0.40 | 0.00  | 0.50  | 1.30  | 2.00  |
| Kyrgyzstan                       | 4.30                                                      | 2.30  | 0.90  | -0.10 | -0.50 | -0.60 | -0.60 |
| Laos                             | 0.40                                                      | 0.30  | 0.10  | -0.50 | -1.20 | -1.70 | -1.80 |
| Lesotho                          | 0.10                                                      | -0.10 | -0.20 | -0.20 | -0.20 | -0.10 | 0.10  |
| Liberia                          | 1.60                                                      | 1.00  | 0.40  | -0.30 | -0.70 | -0.80 | -0.80 |
| Madagascar                       | 3.30                                                      | 1.10  | -1.90 | -4.80 | -7.00 | -8.20 | -8.60 |
| Malawi                           | 0.30                                                      | 0.00  | -0.10 | -0.20 | -0.30 | -0.20 | -0.10 |
| Maldives                         | -1.00                                                     | -0.60 | -0.20 | 0.30  | 0.80  | 1.50  | 2.00  |
| Mali                             | 0.40                                                      | 0.40  | 0.30  | 0.30  | 0.30  | 0.50  | 0.80  |
| Mozambique                       | -0.80                                                     | -0.70 | -0.50 | -0.30 | -0.10 | 0.30  | 0.60  |
| Myanmar                          | 0.60                                                      | 0.40  | 0.00  | -0.40 | -0.80 | -1.20 | -1.50 |
| Nepal                            | -0.30                                                     | -0.30 | -0.20 | 0.20  | 0.60  | 1.00  | 0.90  |
| Niger                            | 1.10                                                      | 1.00  | 0.30  | -1.00 | -2.50 | -3.70 | -4.10 |
| Nigeria                          | -0.10                                                     | -0.20 | -0.20 | -0.10 | -0.10 | 0.10  | 0.40  |
| Pakistan                         | 0.40                                                      | 0.20  | -0.20 | -0.60 | -1.10 | -1.50 | -1.90 |
| Papua New Guinea                 | 4.70                                                      | 3.80  | 2.40  | 0.80  | -0.70 | -2.20 | -3.40 |
| Philippines                      | 0.20                                                      | 0.10  | -0.10 | -0.20 | -0.30 | -0.30 | -0.20 |
| Rwanda                           | -0.10                                                     | -0.20 | -0.20 | 0.00  | 0.50  | 1.10  | 1.30  |

|                        |       |       |       |       |       |       |       |
|------------------------|-------|-------|-------|-------|-------|-------|-------|
| Sao Tome and Principe  | 0.40  | 0.50  | 0.50  | 0.50  | 0.50  | 0.60  | 0.60  |
| Senegal                | 0.10  | 0.00  | 0.10  | 0.00  | 0.00  | 0.20  | 0.20  |
| Sierra Leone           | 1.80  | 1.10  | 0.40  | -0.10 | -0.50 | -0.70 | -0.80 |
| Tajikistan             | 3.90  | 2.70  | 1.20  | -0.10 | -1.40 | -2.10 | -2.60 |
| Tanzania               | -0.10 | -0.10 | 0.00  | 0.00  | 0.20  | 0.40  | 0.60  |
| The Gambia             | 0.20  | 0.20  | 0.20  | 0.30  | 0.50  | 0.70  | 0.80  |
| Timor-Leste            | -2.40 | -2.20 | -1.40 | -0.20 | 0.80  | 1.20  | 1.20  |
| Togo                   | 0.80  | 0.60  | 0.30  | -0.30 | -0.80 | -1.30 | -1.60 |
| Uganda                 | 0.00  | 0.00  | 0.00  | 0.20  | 0.30  | 0.50  | 0.70  |
| Vietnam                | -0.30 | -0.30 | -0.30 | -0.20 | -0.10 | 0.00  | 0.10  |
| Zambia                 | -0.10 | -0.20 | -0.30 | -0.20 | -0.20 | 0.00  | 0.10  |
| Zimbabwe               | 2.20  | 1.10  | 0.20  | -0.60 | -1.20 | -1.60 | -1.80 |
| All countries (median) | 0.20  | 0.00  | -0.10 | -0.10 | -0.15 | -0.05 | 0.10  |
| All countries (mean)   | 0.52  | 0.24  | -0.03 | -0.24 | -0.38 | -0.39 | -0.32 |

ANC visit, antenatal care visit



Table S12: Posterior mean difference by altering prior distribution on hyperparameters for single ANC visit

| Country                          | Mean difference with and without country level predictors |       |       |       |       |       |       |
|----------------------------------|-----------------------------------------------------------|-------|-------|-------|-------|-------|-------|
|                                  | 2000                                                      | 2005  | 2010  | 2015  | 2020  | 2025  | 2030  |
| Afghanistan                      | 0.10                                                      | -0.10 | -0.40 | -0.70 | -0.60 | -0.30 | -0.10 |
| Albania                          | 0.10                                                      | 0.10  | 0.00  | 0.00  | 0.20  | 0.50  | 0.90  |
| Angola                           | 0.30                                                      | 0.20  | 0.10  | -0.20 | -0.40 | -0.60 | -0.50 |
| Armenia                          | 0.50                                                      | 0.00  | 0.00  | 0.00  | 0.00  | 0.00  | 0.00  |
| Bangladesh                       | 0.70                                                      | 0.50  | 0.20  | 0.10  | 0.00  | -0.10 | 0.00  |
| Benin                            | 0.90                                                      | 0.50  | 0.10  | -0.10 | 0.00  | 0.40  | 0.90  |
| Burkina Faso                     | 0.20                                                      | 0.10  | 0.00  | 0.00  | 0.00  | -0.10 | 0.00  |
| Burundi                          | 0.20                                                      | 0.10  | 0.00  | 0.00  | 0.00  | 0.00  | 0.00  |
| Cambodia                         | 0.10                                                      | 0.10  | 0.00  | 0.10  | 0.00  | 0.00  | 0.00  |
| Cameroon                         | -0.30                                                     | -0.40 | -0.40 | -0.30 | -0.10 | 0.00  | 0.20  |
| Central African Republic         | 0.90                                                      | 0.50  | 0.20  | 0.10  | 0.00  | 0.00  | 0.00  |
| Chad                             | 0.00                                                      | 0.00  | 0.00  | 0.10  | 0.30  | 0.40  | 0.50  |
| Comoros                          | 0.90                                                      | 0.40  | 0.10  | 0.00  | -0.20 | -0.10 | -0.10 |
| Congo                            | -0.40                                                     | -0.20 | 0.10  | 0.30  | 0.50  | 0.60  | 0.60  |
| Cote d'Ivoire                    | -0.60                                                     | -0.30 | 0.00  | 0.20  | 0.40  | 0.50  | 0.50  |
| Democratic Republic of the Congo | -0.20                                                     | -0.20 | -0.10 | 0.00  | 0.20  | 0.50  | 0.80  |
| Dominican Republic               | 0.40                                                      | -0.10 | 0.00  | 0.00  | 0.00  | 0.00  | 0.00  |
| Ethiopia                         | 0.10                                                      | 0.10  | 0.10  | 0.10  | 0.10  | 0.00  | 0.10  |
| Ghana                            | 0.10                                                      | 0.10  | 0.00  | 0.00  | -0.10 | 0.00  | -0.10 |
| Guinea                           | 0.40                                                      | 0.20  | 0.10  | 0.00  | 0.00  | 0.00  | 0.20  |
| Haiti                            | 0.40                                                      | 0.10  | -0.20 | -0.20 | -0.10 | 0.10  | 0.20  |
| Honduras                         | 0.50                                                      | 0.10  | 0.00  | 0.00  | -0.10 | 0.00  | 0.00  |
| India                            | 0.20                                                      | 0.10  | 0.10  | 0.10  | 0.10  | 0.10  | 0.20  |
| Indonesia                        | -0.10                                                     | -0.10 | -0.10 | -0.10 | 0.00  | -0.10 | 0.00  |
| Kenya                            | -0.20                                                     | -0.40 | -0.20 | 0.00  | 0.20  | 0.20  | 0.30  |
| Kyrgyzstan                       | -0.50                                                     | -0.20 | 0.00  | 0.00  | 0.00  | 0.00  | 0.00  |
| Laos                             | 0.00                                                      | 0.00  | 0.10  | 0.20  | 0.30  | 0.20  | 0.20  |
| Lesotho                          | -0.10                                                     | -0.20 | -0.10 | -0.20 | -0.10 | 0.00  | -0.10 |
| Liberia                          | 1.10                                                      | 0.30  | 0.00  | -0.10 | 0.00  | -0.10 | 0.00  |
| Madagascar                       | 0.30                                                      | -0.10 | -0.40 | -0.40 | -0.30 | -0.30 | -0.10 |
| Malawi                           | 0.10                                                      | 0.00  | 0.00  | 0.00  | 0.00  | 0.00  | 0.00  |
| Maldives                         | 0.00                                                      | 0.00  | 0.00  | 0.00  | 0.10  | 0.10  | 0.30  |
| Mali                             | 0.30                                                      | 0.10  | -0.10 | -0.10 | -0.10 | 0.10  | 0.20  |
| Mozambique                       | 0.40                                                      | 0.20  | 0.10  | -0.10 | -0.10 | -0.20 | -0.30 |
| Myanmar                          | 0.60                                                      | 0.50  | 0.40  | 0.20  | -0.10 | -0.10 | -0.30 |
| Nepal                            | -0.40                                                     | -0.40 | -0.20 | 0.00  | 0.10  | 0.30  | 0.20  |
| Niger                            | -0.10                                                     | -0.30 | -0.30 | -0.20 | -0.10 | 0.00  | 0.00  |
| Nigeria                          | 0.80                                                      | 0.50  | 0.20  | 0.10  | -0.10 | -0.20 | -0.20 |
| Pakistan                         | -0.90                                                     | -0.80 | -0.60 | -0.30 | 0.00  | 0.20  | 0.30  |

|                        |       |       |       |       |      |       |       |
|------------------------|-------|-------|-------|-------|------|-------|-------|
| Papua New Guinea       | -1.00 | -0.60 | -0.20 | 0.30  | 0.80 | 1.20  | 1.40  |
| Philippines            | -0.70 | -0.50 | -0.30 | -0.10 | 0.10 | 0.10  | 0.30  |
| Rwanda                 | 0.10  | 0.00  | 0.00  | 0.00  | 0.00 | 0.00  | 0.00  |
| Sao Tome and Principe  | 0.50  | 0.10  | 0.00  | 0.00  | 0.00 | 0.00  | 0.00  |
| Senegal                | 0.20  | 0.10  | 0.00  | 0.00  | 0.00 | 0.00  | 0.00  |
| Sierra Leone           | 0.60  | 0.10  | 0.00  | 0.00  | 0.00 | -0.10 | 0.00  |
| Tajikistan             | 0.20  | 0.10  | 0.20  | 0.20  | 0.20 | 0.30  | 0.20  |
| Tanzania               | 0.40  | 0.20  | 0.10  | 0.10  | 0.00 | 0.00  | -0.10 |
| The Gambia             | 0.00  | 0.00  | 0.00  | 0.10  | 0.00 | 0.00  | 0.00  |
| Timor-Leste            | 1.80  | 1.20  | 0.70  | 0.40  | 0.10 | 0.00  | -0.10 |
| Togo                   | 0.20  | 0.30  | 0.30  | 0.40  | 0.60 | 0.80  | 1.00  |
| Uganda                 | 0.00  | 0.00  | 0.00  | 0.00  | 0.00 | 0.00  | 0.00  |
| Vietnam                | -0.20 | -0.20 | -0.10 | 0.00  | 0.10 | 0.10  | 0.20  |
| Zambia                 | 0.20  | 0.10  | 0.00  | 0.00  | 0.00 | 0.00  | 0.10  |
| Zimbabwe               | 0.00  | -0.10 | -0.10 | -0.10 | 0.00 | 0.20  | 0.30  |
| All countries (median) | 0.15  | 0.10  | 0.00  | 0.00  | 0.00 | 0.00  | 0.00  |
| All countries (mean)   | 0.17  | 0.04  | 0.00  | 0.01  | 0.05 | 0.09  | 0.15  |

ANC visit, antenatal care visit

Table S13: Posterior mean difference by altering prior distribution on hyperparameters for at least four ANC visits

| Country                          | Mean difference with and without country level predictors |       |       |       |       |       |       |
|----------------------------------|-----------------------------------------------------------|-------|-------|-------|-------|-------|-------|
|                                  | 2000                                                      | 2005  | 2010  | 2015  | 2020  | 2025  | 2030  |
| Afghanistan                      | 0.20                                                      | 0.20  | 0.10  | -0.20 | -1.00 | -2.10 | -3.10 |
| Albania                          | -0.10                                                     | -0.20 | -0.20 | -0.30 | -0.40 | -0.60 | -0.70 |
| Angola                           | -0.10                                                     | 0.00  | -0.10 | -0.10 | -0.30 | -0.40 | -0.50 |
| Armenia                          | -0.20                                                     | -0.20 | -0.10 | -0.10 | -0.10 | 0.00  | 0.00  |
| Bangladesh                       | -0.20                                                     | -0.30 | -0.30 | -0.30 | -0.40 | -0.50 | -0.50 |
| Benin                            | -0.50                                                     | -0.30 | -0.20 | -0.20 | -0.10 | -0.20 | -0.40 |
| Burkina Faso                     | -0.10                                                     | 0.00  | 0.10  | 0.30  | 0.40  | 0.40  | 0.50  |
| Burundi                          | 0.60                                                      | 0.50  | 0.30  | 0.10  | -0.10 | -0.40 | -0.70 |
| Cambodia                         | 0.00                                                      | 0.00  | -0.10 | 0.00  | 0.00  | 0.00  | 0.00  |
| Cameroon                         | -0.20                                                     | 0.00  | 0.20  | 0.40  | 0.40  | 0.50  | 0.60  |
| Central African Republic         | 0.00                                                      | -0.10 | -0.20 | -0.30 | -0.30 | -0.40 | -0.60 |
| Chad                             | -0.20                                                     | -0.20 | -0.10 | 0.00  | 0.20  | 0.40  | 0.70  |
| Comoros                          | -1.20                                                     | -0.80 | -0.40 | 0.20  | 0.60  | 1.10  | 1.30  |
| Congo                            | 0.10                                                      | 0.10  | 0.10  | 0.10  | 0.10  | 0.00  | 0.00  |
| Cote d'Ivoire                    | 0.60                                                      | 0.50  | 0.30  | 0.00  | -0.30 | -0.60 | -0.70 |
| Democratic Republic of the Congo | -0.20                                                     | -0.10 | 0.10  | 0.20  | 0.30  | 0.30  | 0.40  |
| Dominican Republic               | 0.20                                                      | 0.10  | -0.10 | 0.00  | -0.10 | -0.10 | -0.10 |
| Ethiopia                         | 0.10                                                      | 0.00  | 0.00  | 0.00  | -0.20 | -0.40 | -0.60 |
| Ghana                            | 0.20                                                      | 0.20  | 0.10  | 0.10  | 0.10  | 0.00  | 0.00  |
| Guinea                           | 0.10                                                      | 0.10  | 0.10  | 0.10  | 0.10  | 0.10  | 0.10  |
| Haiti                            | -0.20                                                     | -0.10 | 0.10  | 0.20  | 0.30  | 0.30  | 0.20  |
| Honduras                         | 0.00                                                      | -0.10 | -0.10 | -0.10 | -0.20 | -0.30 | -0.40 |
| India                            | 0.20                                                      | 0.20  | 0.20  | 0.30  | 0.20  | 0.20  | 0.20  |
| Indonesia                        | 0.00                                                      | 0.10  | 0.10  | 0.10  | 0.20  | 0.20  | 0.10  |
| Kenya                            | -0.10                                                     | 0.00  | 0.00  | 0.10  | 0.10  | 0.00  | 0.00  |
| Kyrgyzstan                       | -1.70                                                     | -1.00 | -0.40 | 0.00  | 0.20  | 0.30  | 0.30  |
| Laos                             | -0.30                                                     | -0.30 | -0.30 | -0.20 | -0.20 | 0.10  | 0.30  |
| Lesotho                          | 0.20                                                      | 0.20  | 0.10  | 0.00  | 0.00  | -0.10 | -0.30 |
| Liberia                          | -0.70                                                     | -0.50 | -0.20 | 0.00  | 0.00  | 0.00  | 0.00  |
| Madagascar                       | -0.20                                                     | 0.10  | 0.40  | 0.80  | 1.10  | 1.20  | 1.20  |
| Malawi                           | 0.10                                                      | -0.10 | 0.00  | -0.20 | -0.20 | -0.30 | -0.30 |
| Maldives                         | -0.10                                                     | -0.10 | -0.10 | -0.20 | -0.20 | -0.40 | -0.40 |
| Mali                             | -0.20                                                     | -0.30 | -0.20 | -0.20 | -0.20 | -0.30 | -0.40 |
| Mozambique                       | -0.30                                                     | -0.10 | 0.20  | 0.40  | 0.60  | 0.80  | 0.90  |
| Myanmar                          | -1.00                                                     | -0.80 | -0.50 | -0.10 | 0.40  | 0.90  | 1.40  |
| Nepal                            | -0.30                                                     | -0.30 | -0.30 | -0.20 | -0.10 | 0.00  | 0.10  |
| Niger                            | -0.10                                                     | -0.10 | 0.00  | 0.20  | 0.50  | 0.60  | 0.70  |
| Nigeria                          | -0.10                                                     | -0.10 | -0.10 | -0.10 | 0.00  | 0.00  | -0.10 |
| Pakistan                         | 0.20                                                      | 0.20  | 0.20  | 0.20  | 0.10  | 0.00  | -0.20 |

|                        |       |       |       |       |       |       |       |
|------------------------|-------|-------|-------|-------|-------|-------|-------|
| Papua New Guinea       | 0.00  | -0.10 | -0.20 | -0.20 | -0.20 | -0.30 | -0.40 |
| Philippines            | 0.40  | 0.20  | 0.00  | -0.10 | -0.10 | -0.20 | -0.30 |
| Rwanda                 | -0.10 | 0.00  | 0.00  | 0.00  | 0.00  | -0.10 | -0.10 |
| Sao Tome and Principe  | 0.20  | 0.20  | 0.10  | 0.00  | 0.00  | 0.00  | 0.00  |
| Senegal                | 0.30  | 0.20  | 0.20  | 0.00  | 0.00  | -0.20 | -0.30 |
| Sierra Leone           | -0.10 | 0.00  | 0.00  | 0.00  | 0.00  | 0.10  | 0.00  |
| Tajikistan             | -0.10 | -0.10 | -0.20 | -0.30 | -0.40 | -0.40 | -0.40 |
| Tanzania               | -0.60 | -0.50 | -0.50 | -0.40 | -0.40 | -0.30 | -0.30 |
| The Gambia             | 0.10  | 0.00  | -0.10 | -0.20 | -0.30 | -0.40 | -0.50 |
| Timor-Leste            | -0.10 | 0.00  | 0.00  | 0.00  | 0.10  | 0.00  | -0.10 |
| Togo                   | 0.20  | 0.10  | 0.00  | -0.20 | -0.50 | -0.80 | -1.10 |
| Uganda                 | -0.30 | -0.10 | 0.10  | 0.20  | 0.30  | 0.50  | 0.50  |
| Vietnam                | -0.20 | -0.10 | 0.00  | 0.20  | 0.30  | 0.50  | 0.60  |
| Zambia                 | -0.20 | -0.10 | 0.10  | 0.30  | 0.40  | 0.50  | 0.60  |
| Zimbabwe               | -0.40 | -0.30 | -0.20 | -0.10 | -0.10 | -0.10 | -0.20 |
| All countries (median) | -0.10 | -0.10 | 0.00  | 0.00  | 0.00  | 0.00  | -0.05 |
| All countries (mean)   | -0.12 | -0.08 | -0.04 | 0.01  | 0.03  | 0.03  | 0.01  |

ANC visit, antenatal care visit

Table S14: National level estimate of Gelman Rubin Potential scale reduction factors (PSRF) for single ANC visit

| Country                          | Potential scale reduction factors (Point estimate; Upper C.I) |               |               |               |               |               |               |
|----------------------------------|---------------------------------------------------------------|---------------|---------------|---------------|---------------|---------------|---------------|
|                                  | 2000                                                          | 2005          | 2010          | 2015          | 2020          | 2025          | 2030          |
| Afghanistan                      | (1.008;1.028)                                                 | (1.008;1.028) | (1.008;1.028) | (1.008;1.028) | (1.008;1.028) | (1.008;1.028) | (1.008;1.028) |
| Albania                          | (1.008;1.028)                                                 | (1.008;1.028) | (1.008;1.028) | (1.008;1.028) | (1.008;1.028) | (1.008;1.028) | (1.008;1.028) |
| Angola                           | (1.008;1.028)                                                 | (1.008;1.028) | (1.008;1.028) | (1.008;1.028) | (1.008;1.028) | (1.008;1.028) | (1.008;1.028) |
| Armenia                          | (1.008;1.028)                                                 | (1.008;1.028) | (1.008;1.028) | (1.008;1.028) | (1.008;1.028) | (1.008;1.028) | (1.008;1.028) |
| Bangladesh                       | (1.008;1.028)                                                 | (1.008;1.028) | (1.008;1.028) | (1.008;1.028) | (1.008;1.028) | (1.008;1.028) | (1.008;1.028) |
| Benin                            | (1.008;1.028)                                                 | (1.008;1.028) | (1.008;1.028) | (1.008;1.028) | (1.008;1.028) | (1.008;1.028) | (1.008;1.028) |
| Burkina Faso                     | (1.008;1.028)                                                 | (1.008;1.028) | (1.008;1.028) | (1.008;1.028) | (1.008;1.028) | (1.008;1.028) | (1.008;1.028) |
| Burundi                          | (1.008;1.028)                                                 | (1.008;1.028) | (1.008;1.028) | (1.008;1.028) | (1.008;1.028) | (1.008;1.028) | (1.008;1.028) |
| Cambodia                         | (1.008;1.028)                                                 | (1.008;1.028) | (1.008;1.028) | (1.008;1.028) | (1.008;1.028) | (1.008;1.028) | (1.008;1.028) |
| Cameroon                         | (1.008;1.028)                                                 | (1.008;1.028) | (1.008;1.028) | (1.008;1.028) | (1.008;1.028) | (1.008;1.028) | (1.008;1.028) |
| Central African Republic         | (1.008;1.028)                                                 | (1.008;1.028) | (1.008;1.028) | (1.008;1.028) | (1.008;1.028) | (1.008;1.028) | (1.008;1.028) |
| Chad                             | (1.008;1.028)                                                 | (1.008;1.028) | (1.008;1.028) | (1.008;1.028) | (1.008;1.028) | (1.008;1.028) | (1.008;1.028) |
| Comoros                          | (1.008;1.028)                                                 | (1.008;1.028) | (1.008;1.028) | (1.008;1.028) | (1.008;1.028) | (1.008;1.028) | (1.008;1.028) |
| Congo                            | (1.008;1.028)                                                 | (1.008;1.028) | (1.008;1.028) | (1.008;1.028) | (1.008;1.028) | (1.008;1.028) | (1.008;1.028) |
| Cote d'Ivoire                    | (1.008;1.028)                                                 | (1.008;1.028) | (1.008;1.028) | (1.008;1.028) | (1.008;1.028) | (1.008;1.028) | (1.008;1.028) |
| Democratic Republic of the Congo | (1.008;1.028)                                                 | (1.008;1.028) | (1.008;1.028) | (1.008;1.028) | (1.008;1.028) | (1.008;1.028) | (1.008;1.028) |
| Dominican Republic               | (1.008;1.028)                                                 | (1.008;1.028) | (1.008;1.028) | (1.008;1.028) | (1.008;1.028) | (1.008;1.028) | (1.008;1.028) |
| Ethiopia                         | (1.008;1.028)                                                 | (1.008;1.028) | (1.008;1.028) | (1.008;1.028) | (1.008;1.028) | (1.008;1.028) | (1.008;1.028) |
| Ghana                            | (1.008;1.028)                                                 | (1.008;1.028) | (1.008;1.028) | (1.008;1.028) | (1.008;1.028) | (1.008;1.028) | (1.008;1.028) |
| Guinea                           | (1.008;1.028)                                                 | (1.008;1.028) | (1.008;1.028) | (1.008;1.028) | (1.008;1.028) | (1.008;1.028) | (1.008;1.028) |
| Haiti                            | (1.008;1.028)                                                 | (1.008;1.028) | (1.008;1.028) | (1.008;1.028) | (1.008;1.028) | (1.008;1.028) | (1.008;1.028) |
| Honduras                         | (1.008;1.028)                                                 | (1.008;1.028) | (1.008;1.028) | (1.008;1.028) | (1.008;1.028) | (1.008;1.028) | (1.008;1.028) |
| India                            | (1.008;1.028)                                                 | (1.008;1.028) | (1.008;1.028) | (1.008;1.028) | (1.008;1.028) | (1.008;1.028) | (1.008;1.028) |
| Indonesia                        | (1.008;1.028)                                                 | (1.008;1.028) | (1.008;1.028) | (1.008;1.028) | (1.008;1.028) | (1.008;1.028) | (1.008;1.028) |
| Kenya                            | (1.008;1.028)                                                 | (1.008;1.028) | (1.008;1.028) | (1.008;1.028) | (1.008;1.028) | (1.008;1.028) | (1.008;1.028) |
| Kyrgyzstan                       | (1.008;1.028)                                                 | (1.008;1.028) | (1.008;1.028) | (1.008;1.028) | (1.008;1.028) | (1.008;1.028) | (1.008;1.028) |
| Laos                             | (1.008;1.028)                                                 | (1.008;1.028) | (1.008;1.028) | (1.008;1.028) | (1.008;1.028) | (1.008;1.028) | (1.008;1.028) |
| Lesotho                          | (1.008;1.028)                                                 | (1.008;1.028) | (1.008;1.028) | (1.008;1.028) | (1.008;1.028) | (1.008;1.028) | (1.008;1.028) |

|                       |               |               |               |               |               |               |               |
|-----------------------|---------------|---------------|---------------|---------------|---------------|---------------|---------------|
| Liberia               | (1.008;1.028) | (1.008;1.028) | (1.008;1.028) | (1.008;1.028) | (1.008;1.028) | (1.008;1.028) | (1.008;1.028) |
| Madagascar            | (1.008;1.028) | (1.008;1.028) | (1.008;1.028) | (1.008;1.028) | (1.008;1.028) | (1.008;1.028) | (1.008;1.028) |
| Malawi                | (1.008;1.028) | (1.008;1.028) | (1.008;1.028) | (1.008;1.028) | (1.008;1.028) | (1.008;1.028) | (1.008;1.028) |
| Maldives              | (1.008;1.028) | (1.008;1.028) | (1.008;1.028) | (1.008;1.028) | (1.008;1.028) | (1.008;1.028) | (1.008;1.028) |
| Mali                  | (1.008;1.028) | (1.008;1.028) | (1.008;1.028) | (1.008;1.028) | (1.008;1.028) | (1.008;1.028) | (1.008;1.028) |
| Mozambique            | (1.008;1.028) | (1.008;1.028) | (1.008;1.028) | (1.008;1.028) | (1.008;1.028) | (1.008;1.028) | (1.008;1.028) |
| Myanmar               | (1.008;1.028) | (1.008;1.028) | (1.008;1.028) | (1.008;1.028) | (1.008;1.028) | (1.008;1.028) | (1.008;1.028) |
| Nepal                 | (1.008;1.028) | (1.008;1.028) | (1.008;1.028) | (1.008;1.028) | (1.008;1.028) | (1.008;1.028) | (1.008;1.028) |
| Niger                 | (1.008;1.028) | (1.008;1.028) | (1.008;1.028) | (1.008;1.028) | (1.008;1.028) | (1.008;1.028) | (1.008;1.028) |
| Nigeria               | (1.008;1.028) | (1.008;1.028) | (1.008;1.028) | (1.008;1.028) | (1.008;1.028) | (1.008;1.028) | (1.008;1.028) |
| Pakistan              | (1.008;1.028) | (1.008;1.028) | (1.008;1.028) | (1.008;1.028) | (1.008;1.028) | (1.008;1.028) | (1.008;1.028) |
| Papua New Guinea      | (1.008;1.028) | (1.008;1.028) | (1.008;1.028) | (1.008;1.028) | (1.008;1.028) | (1.008;1.028) | (1.008;1.028) |
| Philippines           | (1.008;1.028) | (1.008;1.028) | (1.008;1.028) | (1.008;1.028) | (1.008;1.028) | (1.008;1.028) | (1.008;1.028) |
| Rwanda                | (1.008;1.028) | (1.008;1.028) | (1.008;1.028) | (1.008;1.028) | (1.008;1.028) | (1.008;1.028) | (1.008;1.028) |
| Sao Tome and Principe | (1.008;1.028) | (1.008;1.028) | (1.008;1.028) | (1.008;1.028) | (1.008;1.028) | (1.008;1.028) | (1.008;1.028) |
| Senegal               | (1.008;1.028) | (1.008;1.028) | (1.008;1.028) | (1.008;1.028) | (1.008;1.028) | (1.008;1.028) | (1.008;1.028) |
| Sierra Leone          | (1.008;1.028) | (1.008;1.028) | (1.008;1.028) | (1.008;1.028) | (1.008;1.028) | (1.008;1.028) | (1.008;1.028) |
| Tajikistan            | (1.008;1.028) | (1.008;1.028) | (1.008;1.028) | (1.008;1.028) | (1.008;1.028) | (1.008;1.028) | (1.008;1.028) |
| Tanzania              | (1.008;1.028) | (1.008;1.028) | (1.008;1.028) | (1.008;1.028) | (1.008;1.028) | (1.008;1.028) | (1.008;1.028) |
| The Gambia            | (1.008;1.028) | (1.008;1.028) | (1.008;1.028) | (1.008;1.028) | (1.008;1.028) | (1.008;1.028) | (1.008;1.028) |
| Timor-Leste           | (1.008;1.028) | (1.008;1.028) | (1.008;1.028) | (1.008;1.028) | (1.008;1.028) | (1.008;1.028) | (1.008;1.028) |
| Togo                  | (1.008;1.028) | (1.008;1.028) | (1.008;1.028) | (1.008;1.028) | (1.008;1.028) | (1.008;1.028) | (1.008;1.028) |
| Uganda                | (1.008;1.028) | (1.008;1.028) | (1.008;1.028) | (1.008;1.028) | (1.008;1.028) | (1.008;1.028) | (1.008;1.028) |
| Vietnam               | (1.008;1.028) | (1.008;1.028) | (1.008;1.028) | (1.008;1.028) | (1.008;1.028) | (1.008;1.028) | (1.008;1.028) |
| Zambia                | (1.008;1.028) | (1.008;1.028) | (1.008;1.028) | (1.008;1.028) | (1.008;1.028) | (1.008;1.028) | (1.008;1.028) |
| Zimbabwe              | (1.008;1.028) | (1.008;1.028) | (1.008;1.028) | (1.008;1.028) | (1.008;1.028) | (1.008;1.028) | (1.008;1.028) |

ANC visit, antenatal care visit; C.I, confidence interval

Table S15: National level estimate of Gelman Rubin Potential scale reduction factors (PSRF) for at least four ANC visits

| Country                          | Potential scale reduction factors (Point estimate; Upper C.I) |             |             |             |             |             |             |
|----------------------------------|---------------------------------------------------------------|-------------|-------------|-------------|-------------|-------------|-------------|
|                                  | 2000                                                          | 2005        | 2010        | 2015        | 2020        | 2025        | 2030        |
| Afghanistan                      | (1.01;1.02)                                                   | (1.01;1.02) | (1.01;1.02) | (1.01;1.02) | (1.01;1.02) | (1.01;1.02) | (1.01;1.02) |
| Albania                          | (1.01;1.02)                                                   | (1.01;1.02) | (1.01;1.02) | (1.01;1.02) | (1.01;1.02) | (1.01;1.02) | (1.01;1.02) |
| Angola                           | (1.01;1.02)                                                   | (1.01;1.02) | (1.01;1.02) | (1.01;1.02) | (1.01;1.02) | (1.01;1.02) | (1.01;1.02) |
| Armenia                          | (1.01;1.02)                                                   | (1.01;1.02) | (1.01;1.02) | (1.01;1.02) | (1.01;1.02) | (1.01;1.02) | (1.01;1.02) |
| Bangladesh                       | (1.01;1.02)                                                   | (1.01;1.02) | (1.01;1.02) | (1.01;1.02) | (1.01;1.02) | (1.01;1.02) | (1.01;1.02) |
| Benin                            | (1.01;1.02)                                                   | (1.01;1.02) | (1.01;1.02) | (1.01;1.02) | (1.01;1.02) | (1.01;1.02) | (1.01;1.02) |
| Burkina Faso                     | (1.01;1.02)                                                   | (1.01;1.02) | (1.01;1.02) | (1.01;1.02) | (1.01;1.02) | (1.01;1.02) | (1.01;1.02) |
| Burundi                          | (1.01;1.02)                                                   | (1.01;1.02) | (1.01;1.02) | (1.01;1.02) | (1.01;1.02) | (1.01;1.02) | (1.01;1.02) |
| Cambodia                         | (1.01;1.02)                                                   | (1.01;1.02) | (1.01;1.02) | (1.01;1.02) | (1.01;1.02) | (1.01;1.02) | (1.01;1.02) |
| Cameroon                         | (1.01;1.02)                                                   | (1.01;1.02) | (1.01;1.02) | (1.01;1.02) | (1.01;1.02) | (1.01;1.02) | (1.01;1.02) |
| Central African Republic         | (1.01;1.02)                                                   | (1.01;1.02) | (1.01;1.02) | (1.01;1.02) | (1.01;1.02) | (1.01;1.02) | (1.01;1.02) |
| Chad                             | (1.01;1.02)                                                   | (1.01;1.02) | (1.01;1.02) | (1.01;1.02) | (1.01;1.02) | (1.01;1.02) | (1.01;1.02) |
| Comoros                          | (1.01;1.02)                                                   | (1.01;1.02) | (1.01;1.02) | (1.01;1.02) | (1.01;1.02) | (1.01;1.02) | (1.01;1.02) |
| Congo                            | (1.01;1.02)                                                   | (1.01;1.02) | (1.01;1.02) | (1.01;1.02) | (1.01;1.02) | (1.01;1.02) | (1.01;1.02) |
| Cote d'Ivoire                    | (1.01;1.02)                                                   | (1.01;1.02) | (1.01;1.02) | (1.01;1.02) | (1.01;1.02) | (1.01;1.02) | (1.01;1.02) |
| Democratic Republic of the Congo | (1.01;1.02)                                                   | (1.01;1.02) | (1.01;1.02) | (1.01;1.02) | (1.01;1.02) | (1.01;1.02) | (1.01;1.02) |
| Dominican Republic               | (1.01;1.02)                                                   | (1.01;1.02) | (1.01;1.02) | (1.01;1.02) | (1.01;1.02) | (1.01;1.02) | (1.01;1.02) |
| Ethiopia                         | (1.01;1.02)                                                   | (1.01;1.02) | (1.01;1.02) | (1.01;1.02) | (1.01;1.02) | (1.01;1.02) | (1.01;1.02) |
| Ghana                            | (1.01;1.02)                                                   | (1.01;1.02) | (1.01;1.02) | (1.01;1.02) | (1.01;1.02) | (1.01;1.02) | (1.01;1.02) |
| Guinea                           | (1.01;1.02)                                                   | (1.01;1.02) | (1.01;1.02) | (1.01;1.02) | (1.01;1.02) | (1.01;1.02) | (1.01;1.02) |
| Haiti                            | (1.01;1.02)                                                   | (1.01;1.02) | (1.01;1.02) | (1.01;1.02) | (1.01;1.02) | (1.01;1.02) | (1.01;1.02) |
| Honduras                         | (1.01;1.02)                                                   | (1.01;1.02) | (1.01;1.02) | (1.01;1.02) | (1.01;1.02) | (1.01;1.02) | (1.01;1.02) |
| India                            | (1.01;1.02)                                                   | (1.01;1.02) | (1.01;1.02) | (1.01;1.02) | (1.01;1.02) | (1.01;1.02) | (1.01;1.02) |
| Indonesia                        | (1.01;1.02)                                                   | (1.01;1.02) | (1.01;1.02) | (1.01;1.02) | (1.01;1.02) | (1.01;1.02) | (1.01;1.02) |
| Kenya                            | (1.01;1.02)                                                   | (1.01;1.02) | (1.01;1.02) | (1.01;1.02) | (1.01;1.02) | (1.01;1.02) | (1.01;1.02) |
| Kyrgyzstan                       | (1.01;1.02)                                                   | (1.01;1.02) | (1.01;1.02) | (1.01;1.02) | (1.01;1.02) | (1.01;1.02) | (1.01;1.02) |
| Laos                             | (1.01;1.02)                                                   | (1.01;1.02) | (1.01;1.02) | (1.01;1.02) | (1.01;1.02) | (1.01;1.02) | (1.01;1.02) |
| Lesotho                          | (1.01;1.02)                                                   | (1.01;1.02) | (1.01;1.02) | (1.01;1.02) | (1.01;1.02) | (1.01;1.02) | (1.01;1.02) |

|                       |             |             |             |             |             |             |             |
|-----------------------|-------------|-------------|-------------|-------------|-------------|-------------|-------------|
| Liberia               | (1.01;1.02) | (1.01;1.02) | (1.01;1.02) | (1.01;1.02) | (1.01;1.02) | (1.01;1.02) | (1.01;1.02) |
| Madagascar            | (1.01;1.02) | (1.01;1.02) | (1.01;1.02) | (1.01;1.02) | (1.01;1.02) | (1.01;1.02) | (1.01;1.02) |
| Malawi                | (1.01;1.02) | (1.01;1.02) | (1.01;1.02) | (1.01;1.02) | (1.01;1.02) | (1.01;1.02) | (1.01;1.02) |
| Maldives              | (1.01;1.02) | (1.01;1.02) | (1.01;1.02) | (1.01;1.02) | (1.01;1.02) | (1.01;1.02) | (1.01;1.02) |
| Mali                  | (1.01;1.02) | (1.01;1.02) | (1.01;1.02) | (1.01;1.02) | (1.01;1.02) | (1.01;1.02) | (1.01;1.02) |
| Mozambique            | (1.01;1.02) | (1.01;1.02) | (1.01;1.02) | (1.01;1.02) | (1.01;1.02) | (1.01;1.02) | (1.01;1.02) |
| Myanmar               | (1.01;1.02) | (1.01;1.02) | (1.01;1.02) | (1.01;1.02) | (1.01;1.02) | (1.01;1.02) | (1.01;1.02) |
| Nepal                 | (1.01;1.02) | (1.01;1.02) | (1.01;1.02) | (1.01;1.02) | (1.01;1.02) | (1.01;1.02) | (1.01;1.02) |
| Niger                 | (1.01;1.02) | (1.01;1.02) | (1.01;1.02) | (1.01;1.02) | (1.01;1.02) | (1.01;1.02) | (1.01;1.02) |
| Nigeria               | (1.01;1.02) | (1.01;1.02) | (1.01;1.02) | (1.01;1.02) | (1.01;1.02) | (1.01;1.02) | (1.01;1.02) |
| Pakistan              | (1.01;1.02) | (1.01;1.02) | (1.01;1.02) | (1.01;1.02) | (1.01;1.02) | (1.01;1.02) | (1.01;1.02) |
| Papua New Guinea      | (1.01;1.02) | (1.01;1.02) | (1.01;1.02) | (1.01;1.02) | (1.01;1.02) | (1.01;1.02) | (1.01;1.02) |
| Philippines           | (1.01;1.02) | (1.01;1.02) | (1.01;1.02) | (1.01;1.02) | (1.01;1.02) | (1.01;1.02) | (1.01;1.02) |
| Rwanda                | (1.01;1.02) | (1.01;1.02) | (1.01;1.02) | (1.01;1.02) | (1.01;1.02) | (1.01;1.02) | (1.01;1.02) |
| Sao Tome and Principe | (1.01;1.02) | (1.01;1.02) | (1.01;1.02) | (1.01;1.02) | (1.01;1.02) | (1.01;1.02) | (1.01;1.02) |
| Senegal               | (1.01;1.02) | (1.01;1.02) | (1.01;1.02) | (1.01;1.02) | (1.01;1.02) | (1.01;1.02) | (1.01;1.02) |
| Sierra Leone          | (1.01;1.02) | (1.01;1.02) | (1.01;1.02) | (1.01;1.02) | (1.01;1.02) | (1.01;1.02) | (1.01;1.02) |
| Tajikistan            | (1.01;1.02) | (1.01;1.02) | (1.01;1.02) | (1.01;1.02) | (1.01;1.02) | (1.01;1.02) | (1.01;1.02) |
| Tanzania              | (1.01;1.02) | (1.01;1.02) | (1.01;1.02) | (1.01;1.02) | (1.01;1.02) | (1.01;1.02) | (1.01;1.02) |
| The Gambia            | (1.01;1.02) | (1.01;1.02) | (1.01;1.02) | (1.01;1.02) | (1.01;1.02) | (1.01;1.02) | (1.01;1.02) |
| Timor-Leste           | (1.01;1.02) | (1.01;1.02) | (1.01;1.02) | (1.01;1.02) | (1.01;1.02) | (1.01;1.02) | (1.01;1.02) |
| Togo                  | (1.01;1.02) | (1.01;1.02) | (1.01;1.02) | (1.01;1.02) | (1.01;1.02) | (1.01;1.02) | (1.01;1.02) |
| Uganda                | (1.01;1.02) | (1.01;1.02) | (1.01;1.02) | (1.01;1.02) | (1.01;1.02) | (1.01;1.02) | (1.01;1.02) |
| Vietnam               | (1.01;1.02) | (1.01;1.02) | (1.01;1.02) | (1.01;1.02) | (1.01;1.02) | (1.01;1.02) | (1.01;1.02) |
| Zambia                | (1.01;1.02) | (1.01;1.02) | (1.01;1.02) | (1.01;1.02) | (1.01;1.02) | (1.01;1.02) | (1.01;1.02) |
| Zimbabwe              | (1.01;1.02) | (1.01;1.02) | (1.01;1.02) | (1.01;1.02) | (1.01;1.02) | (1.01;1.02) | (1.01;1.02) |

ANC visit, antenatal care visit; C.I, confidence interval



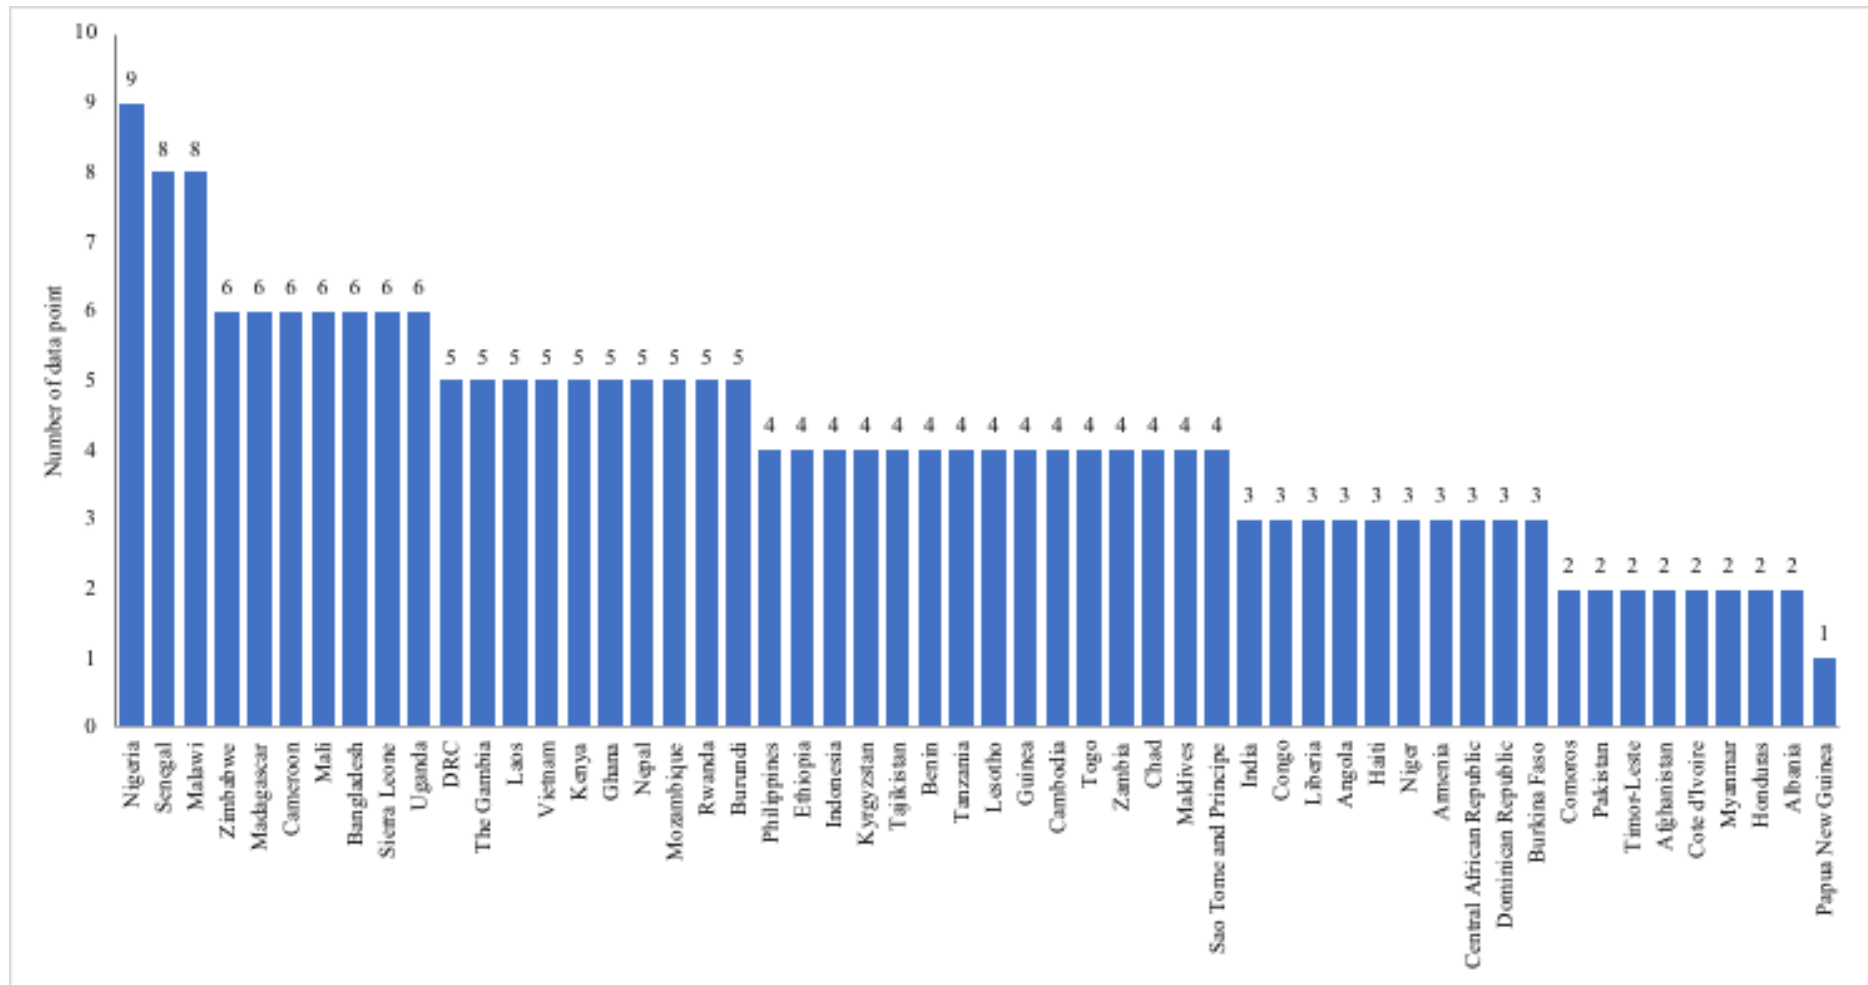

Figure S1: Number of data points by country

Figure S2: Detail years-specific observed and predicted coverage of single ANC visit by area of residence (national, urban, and rural)

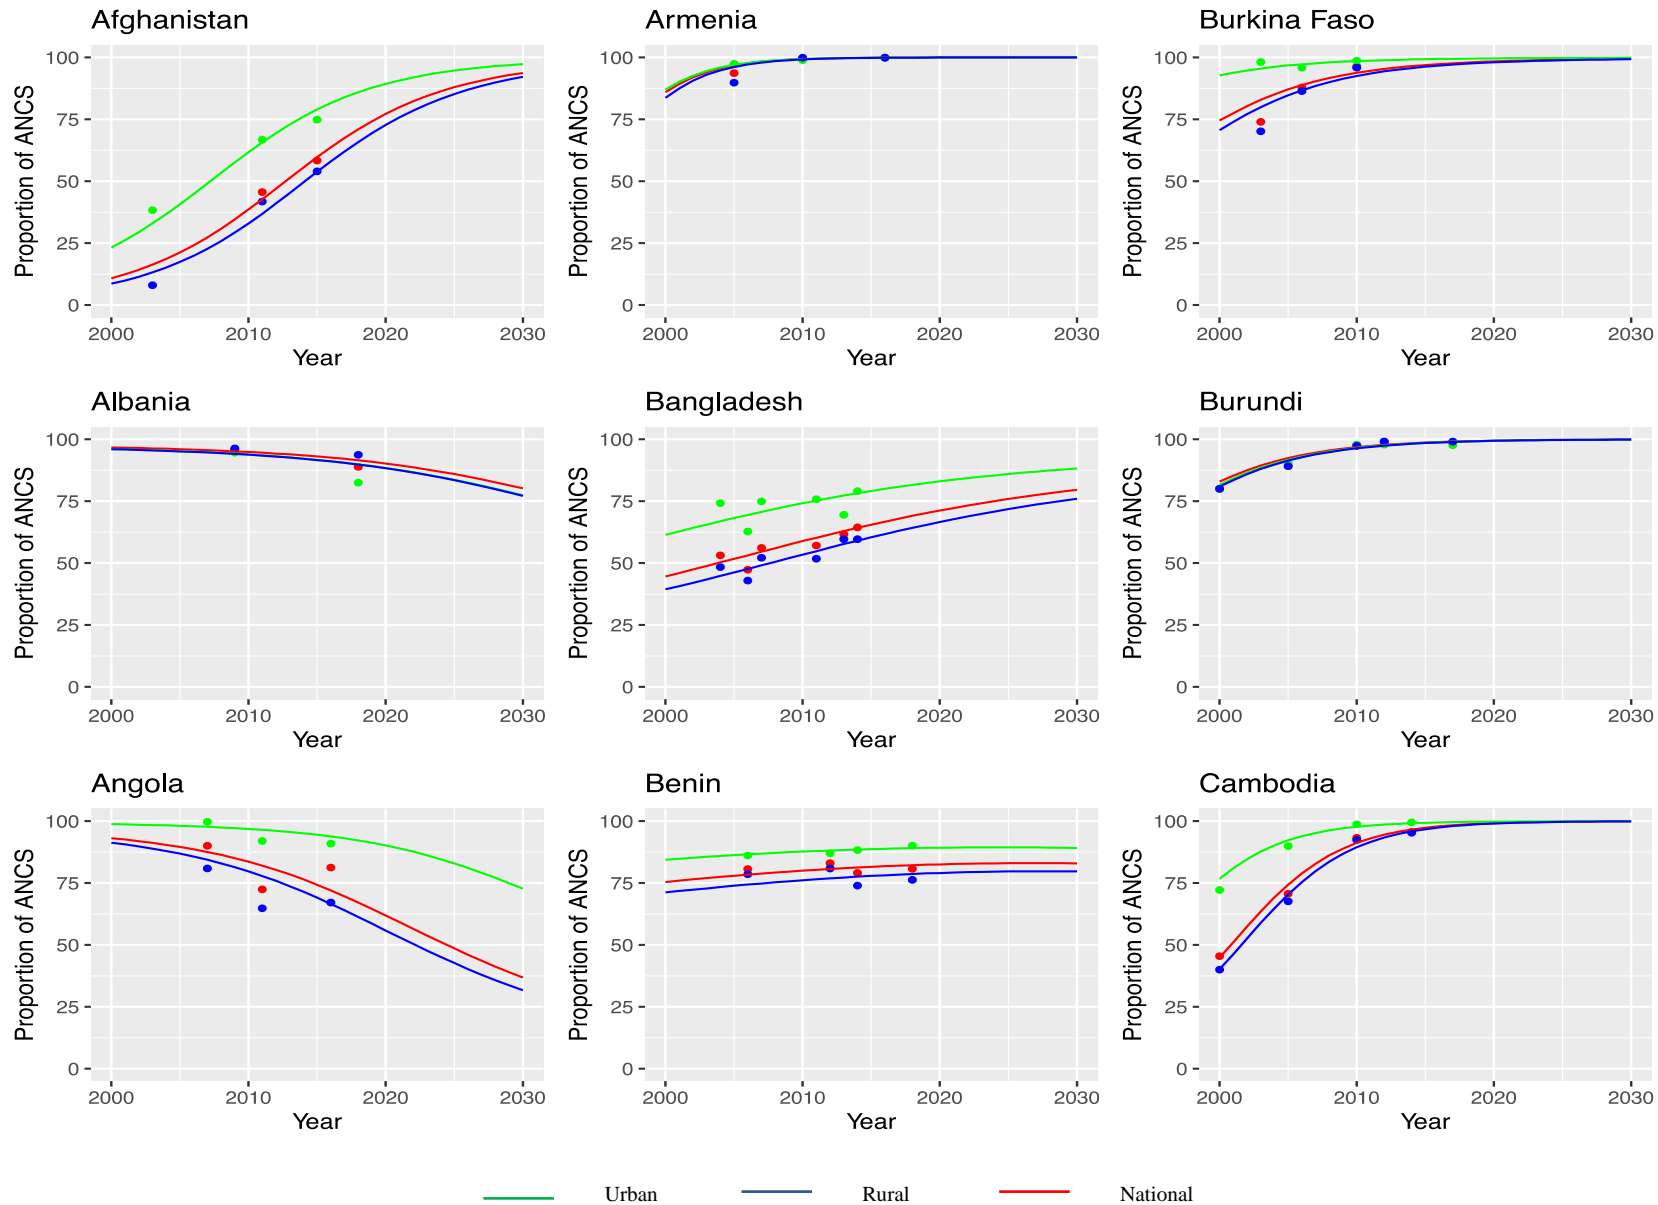

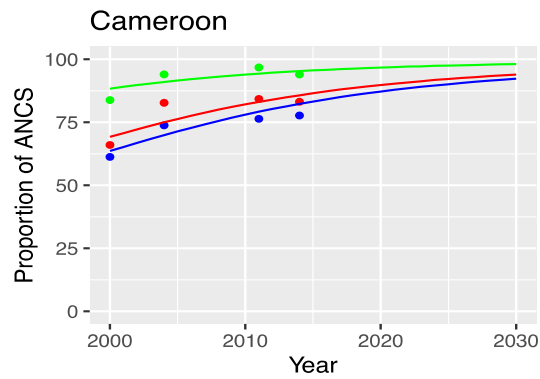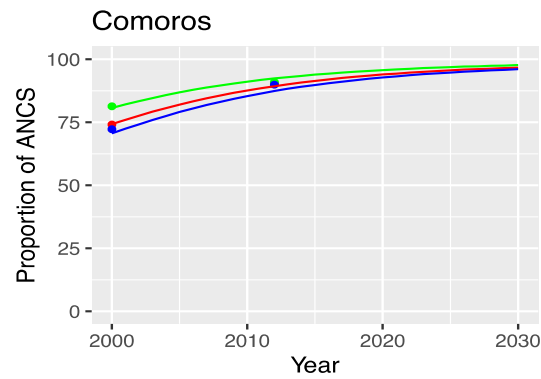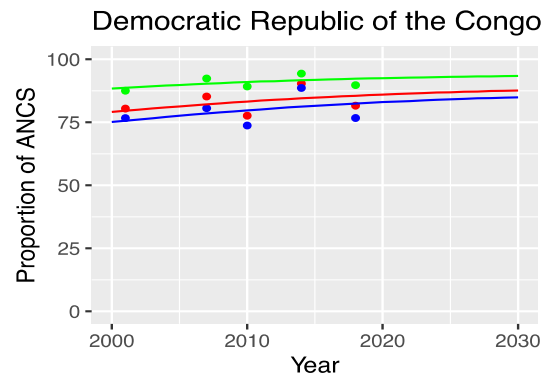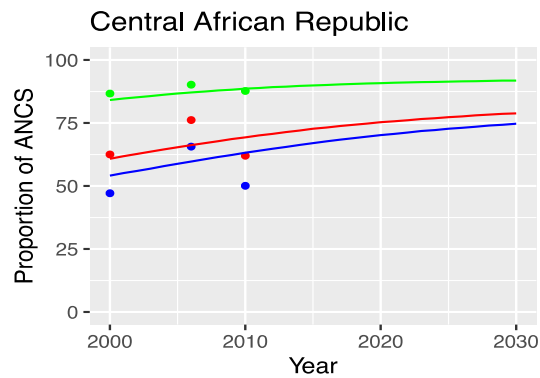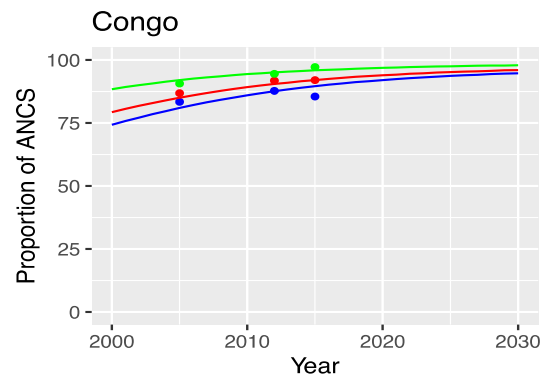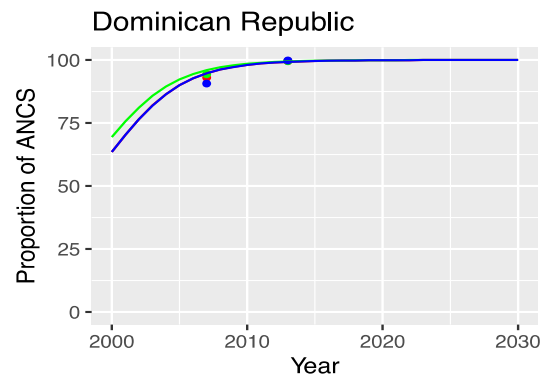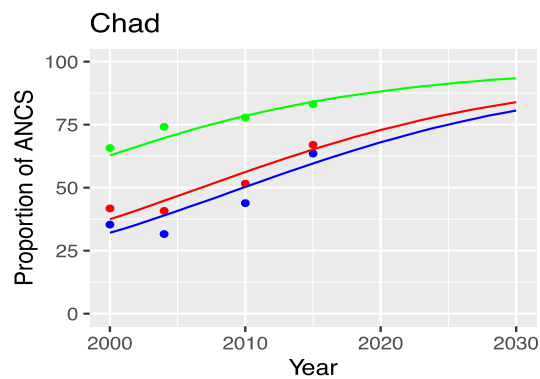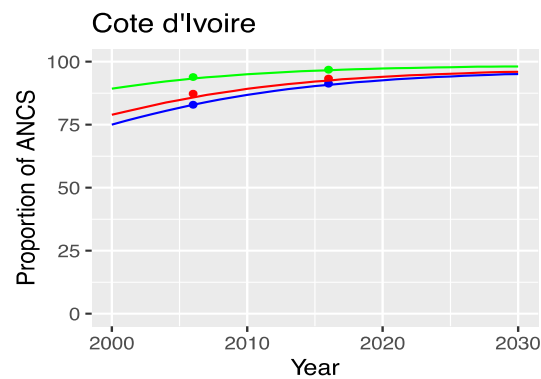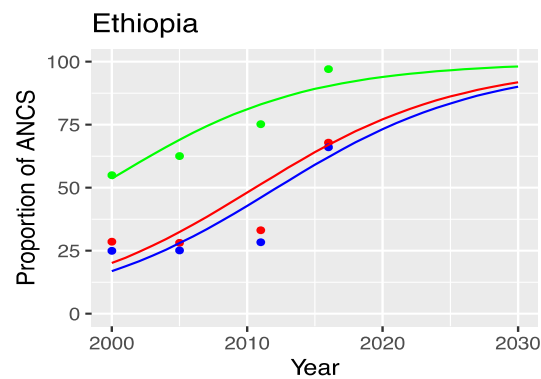

Urban Rural National

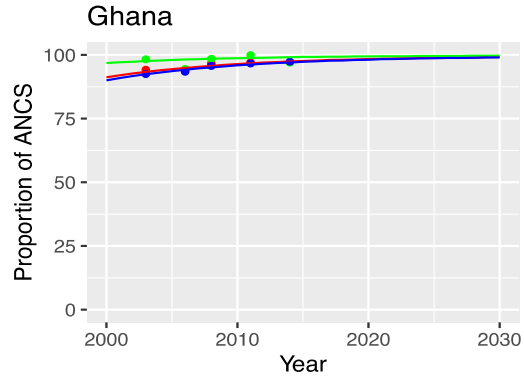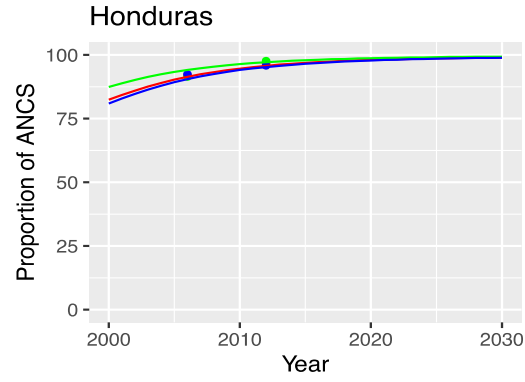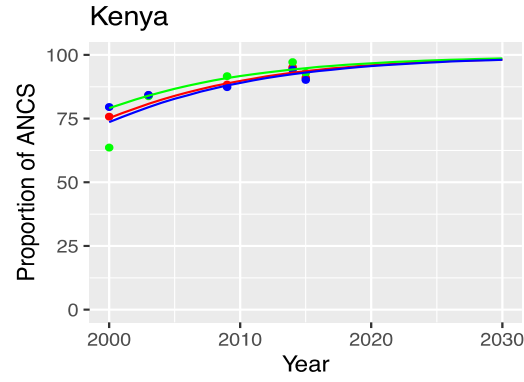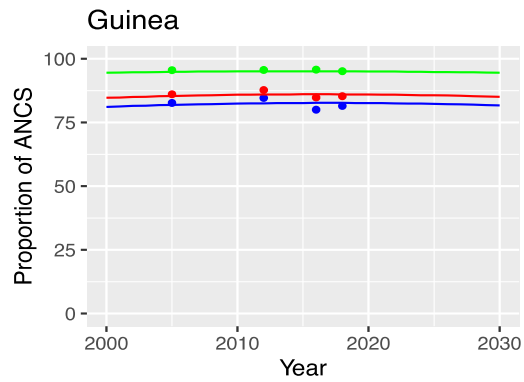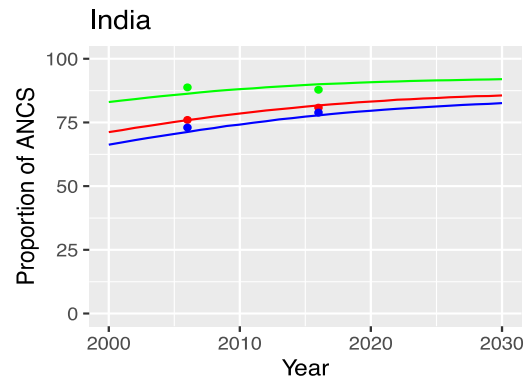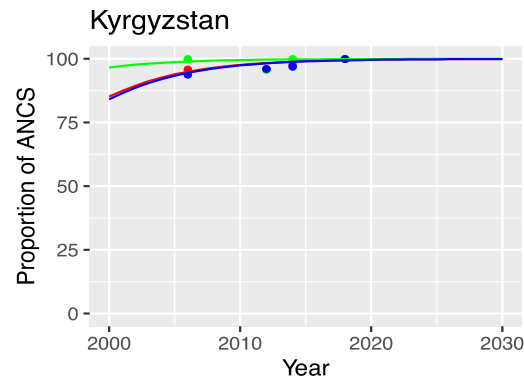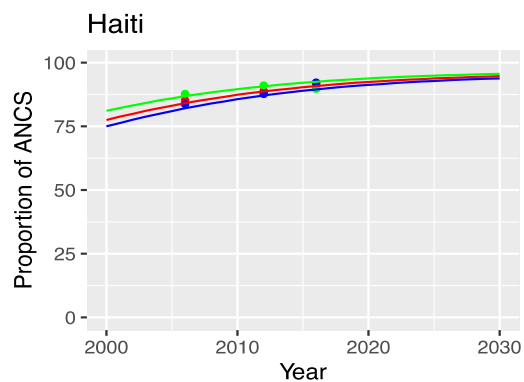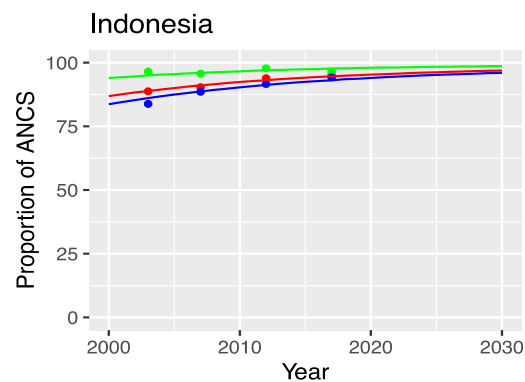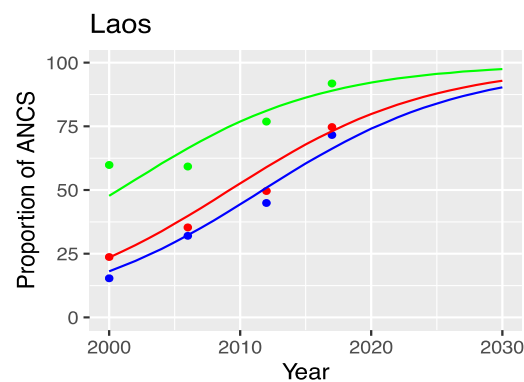

Urban Rural National

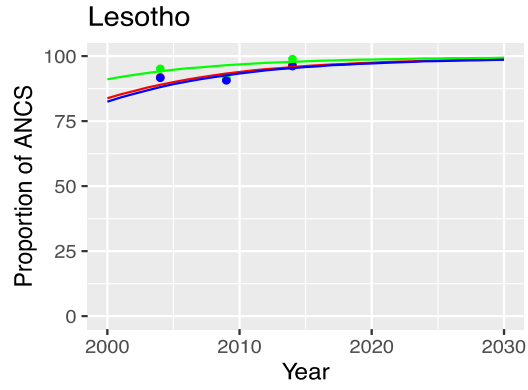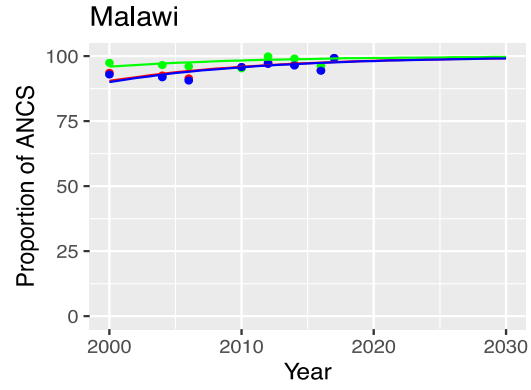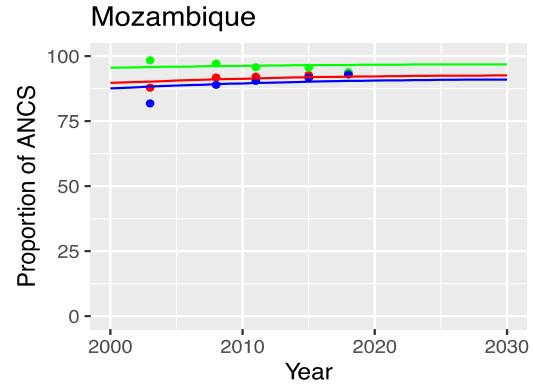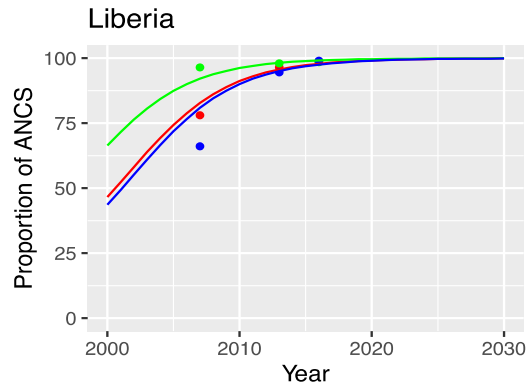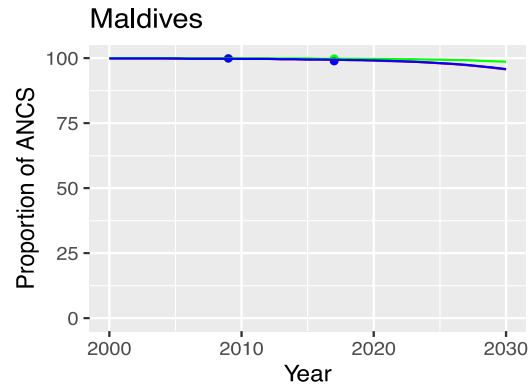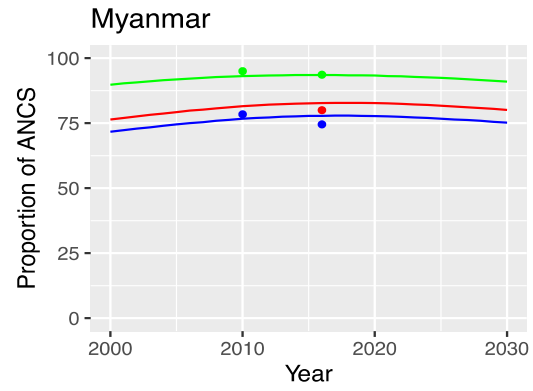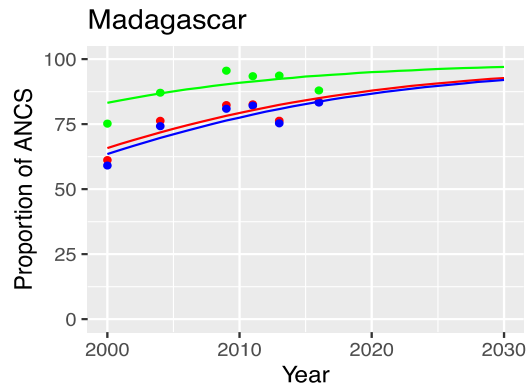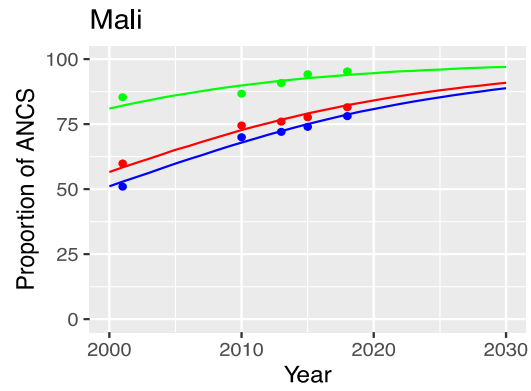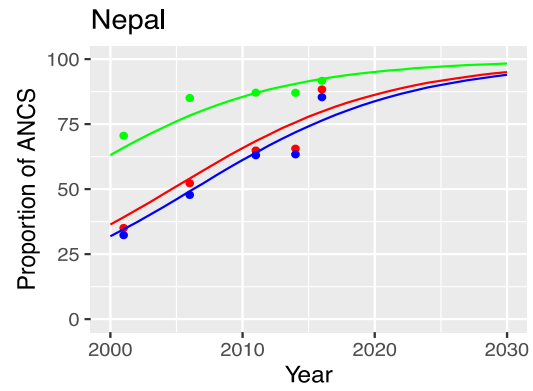

Urban Rural National

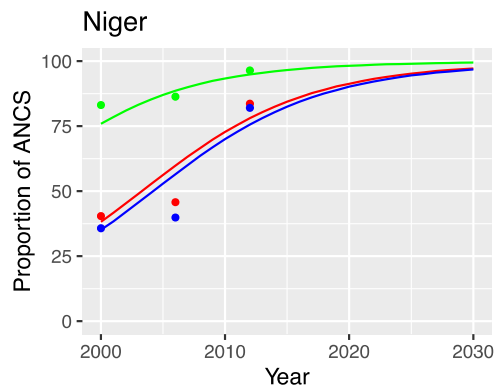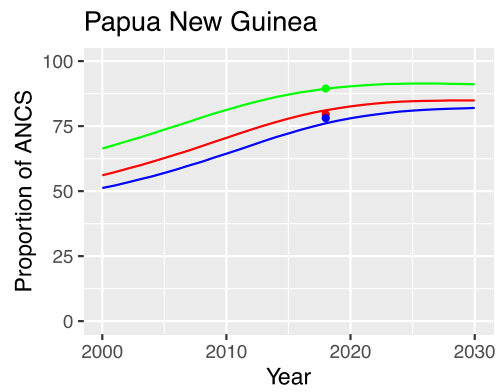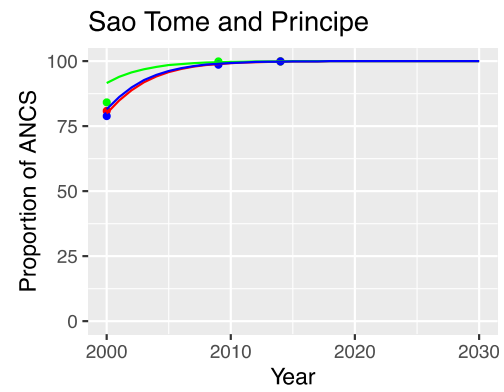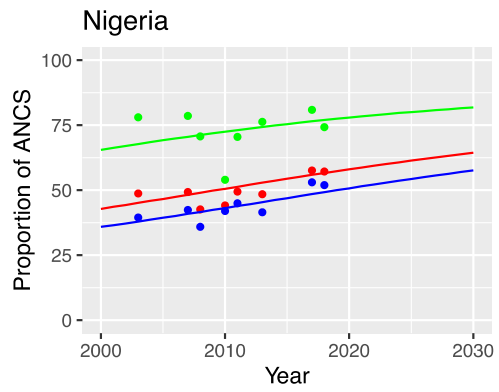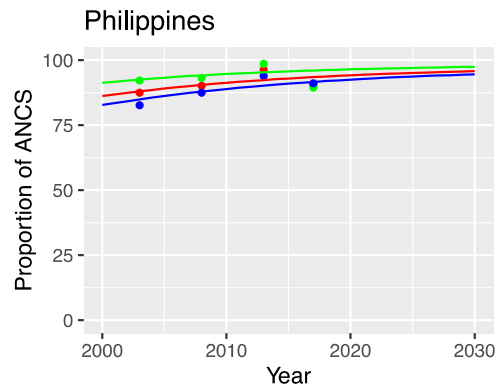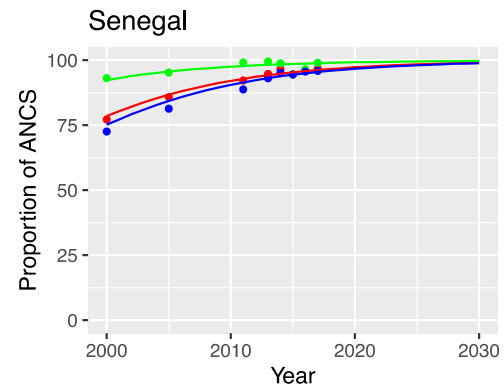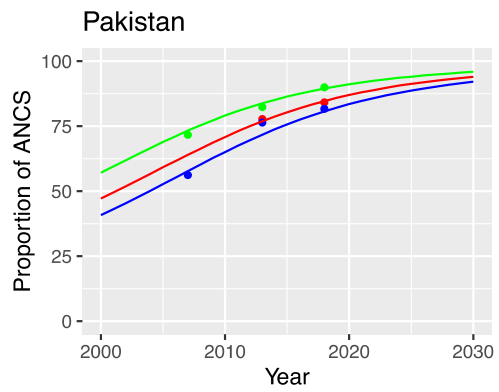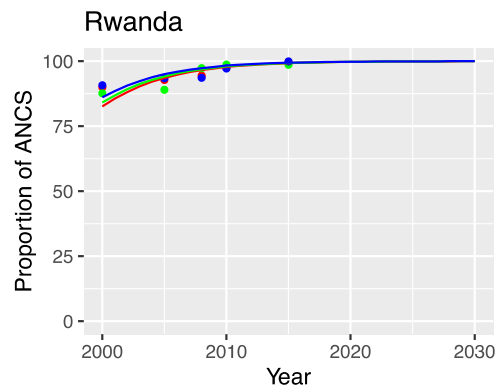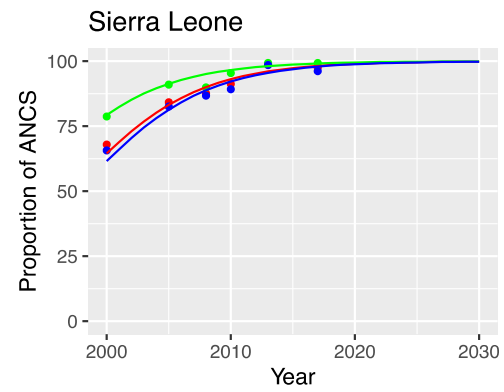

— Urban — Rural — National

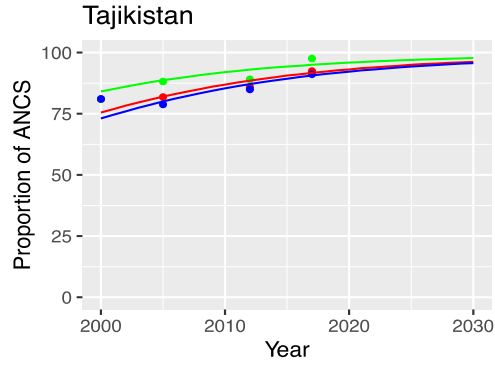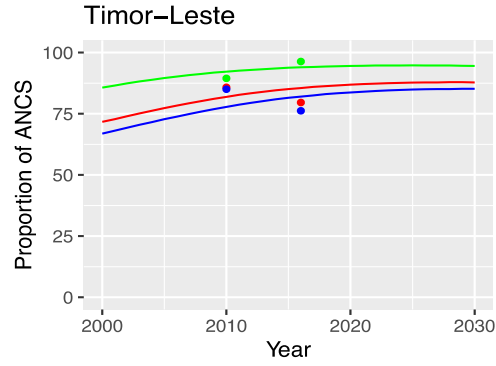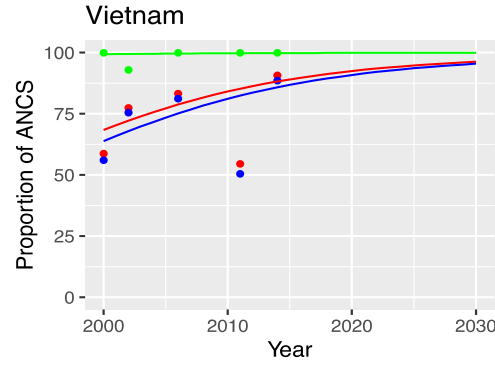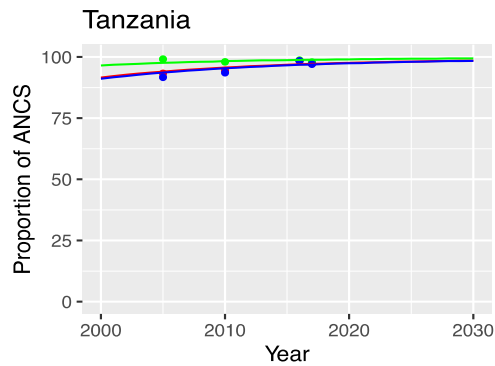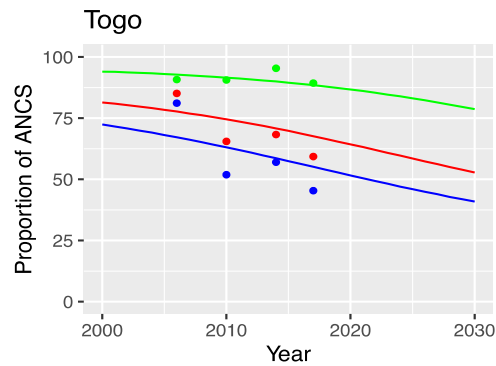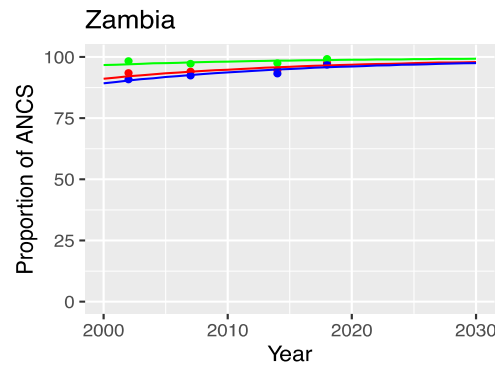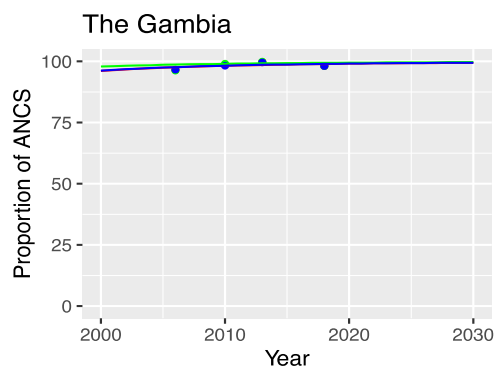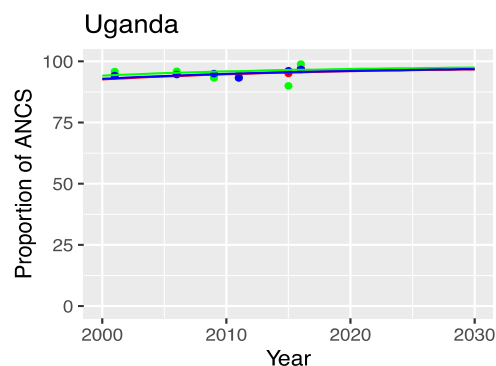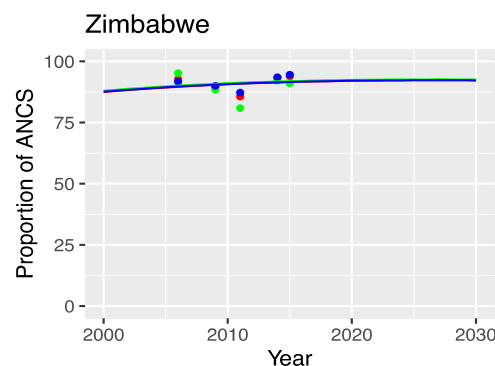

— Urban    
 — Rural    
 — National

Figure S3: Detail years-specific observed and predicted coverage of four ANC visits by area of residence (national, urban, and rural)

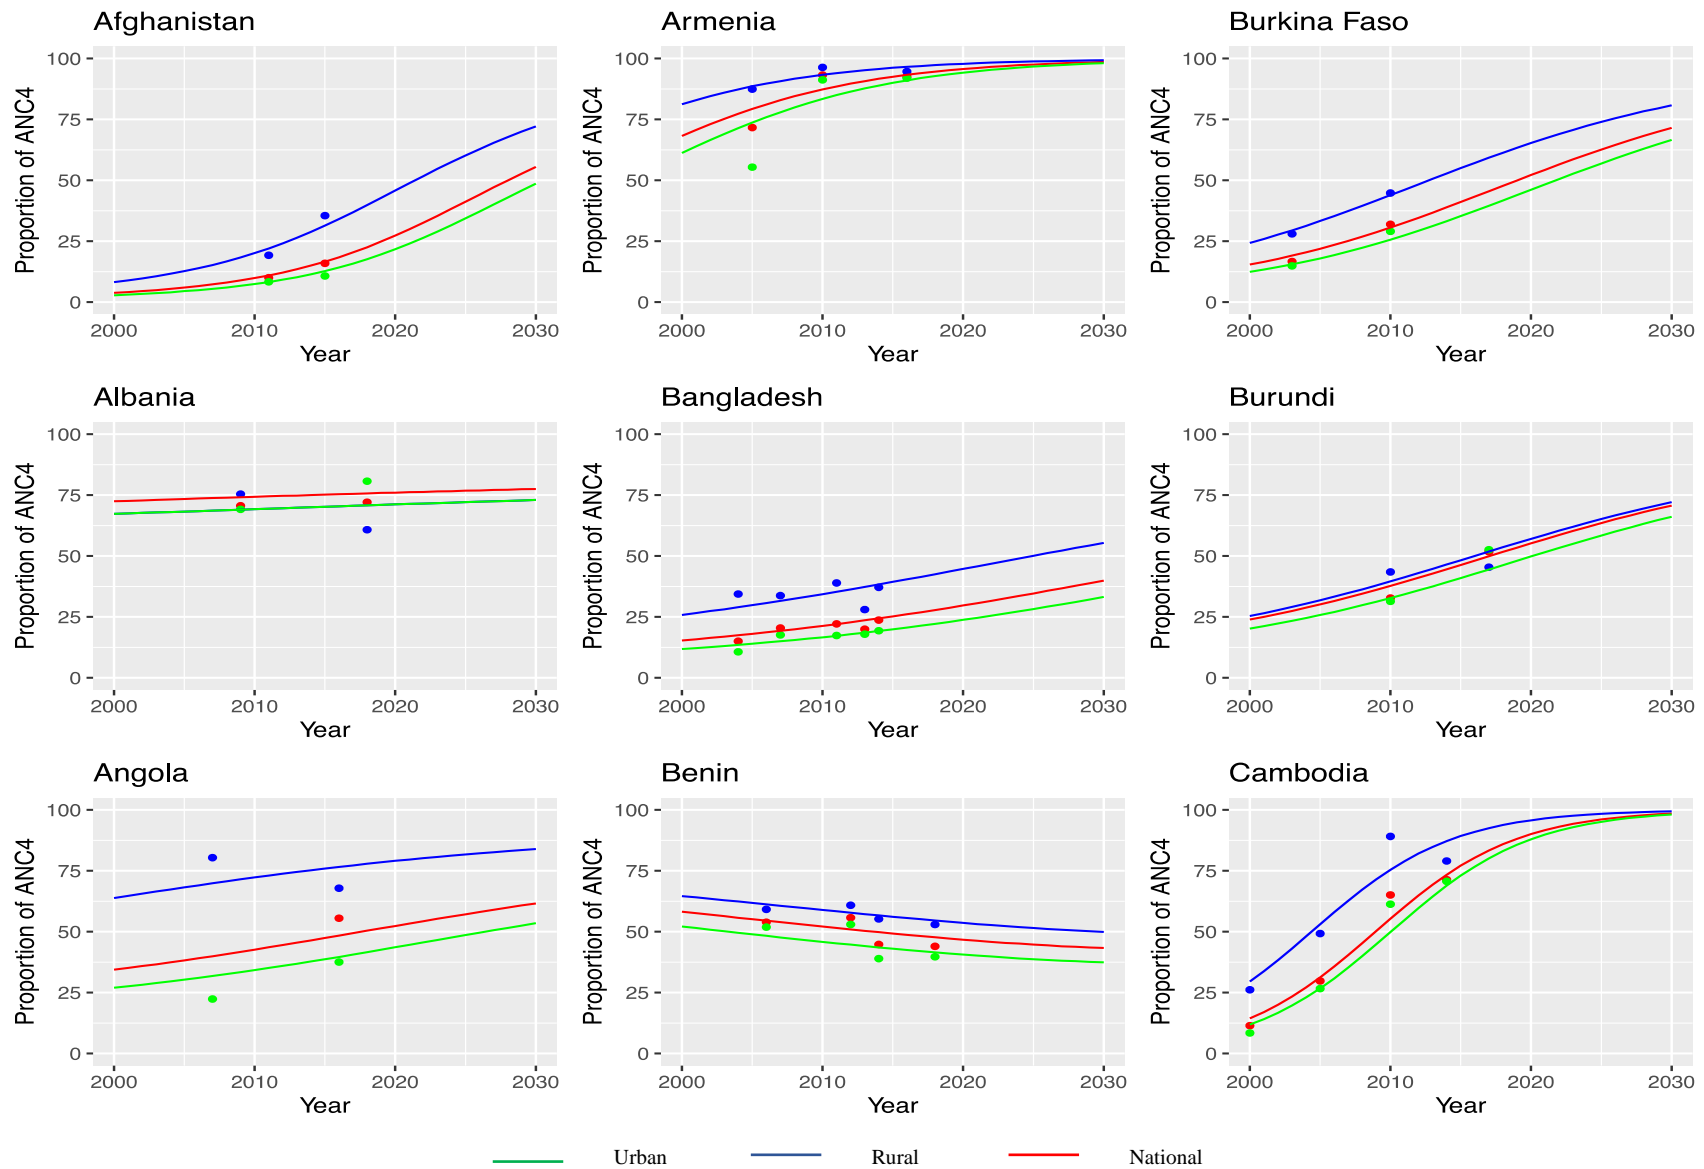



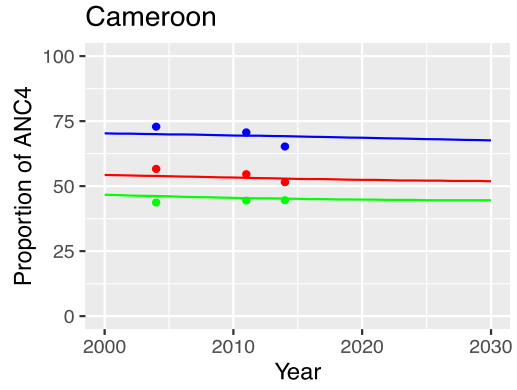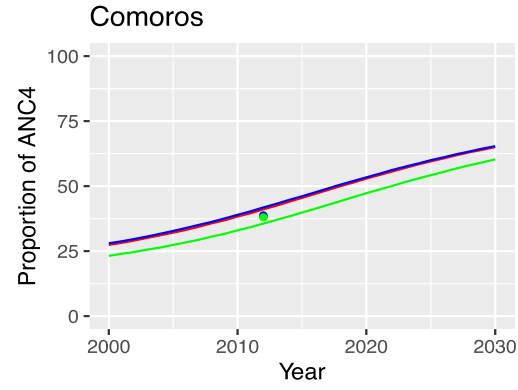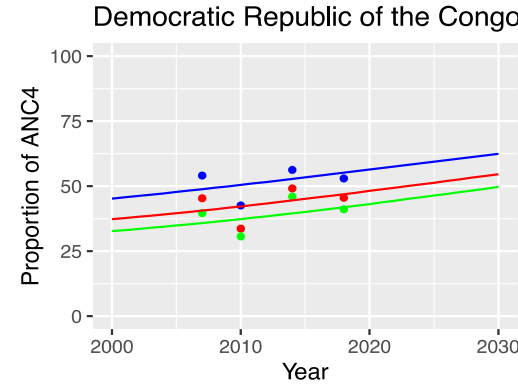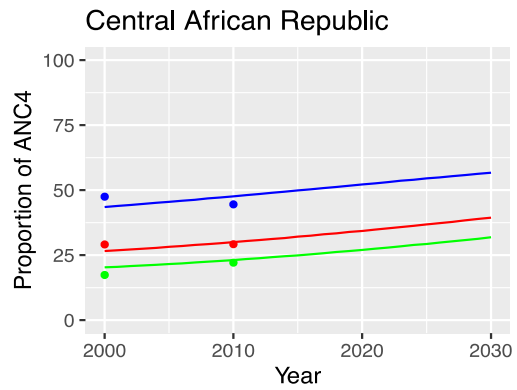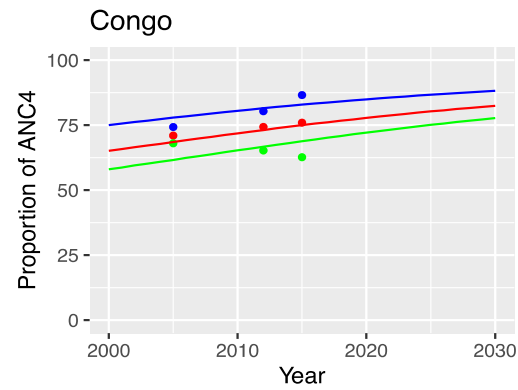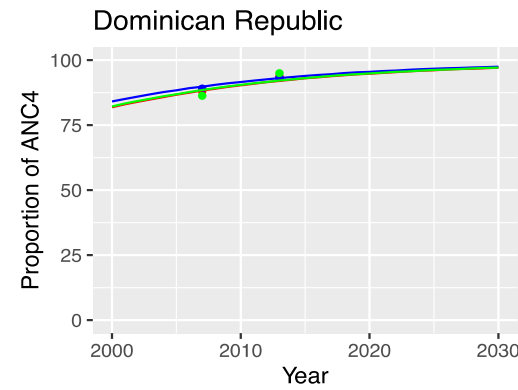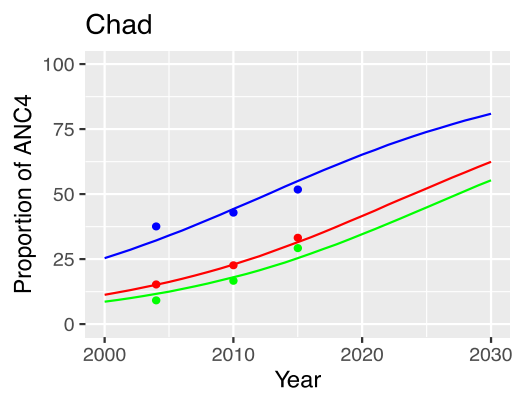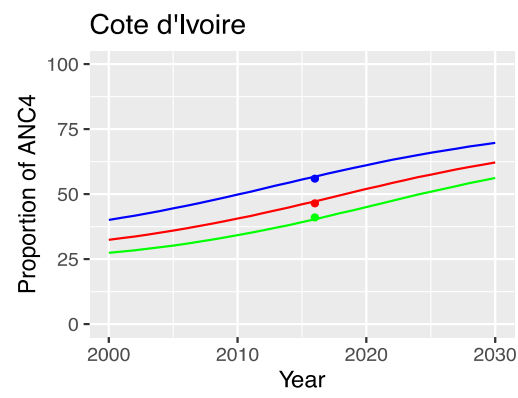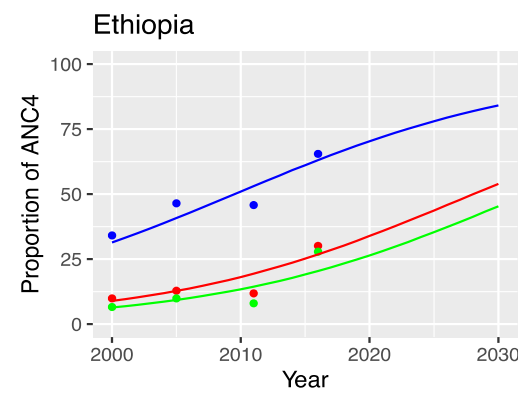

Urban Rural National

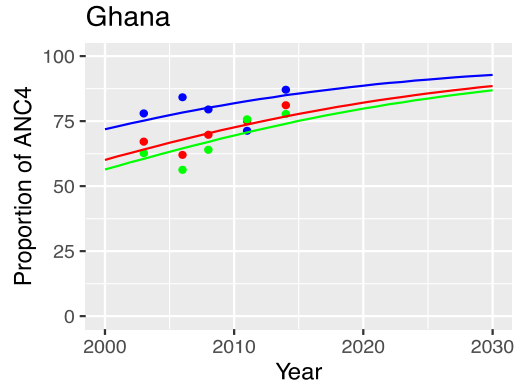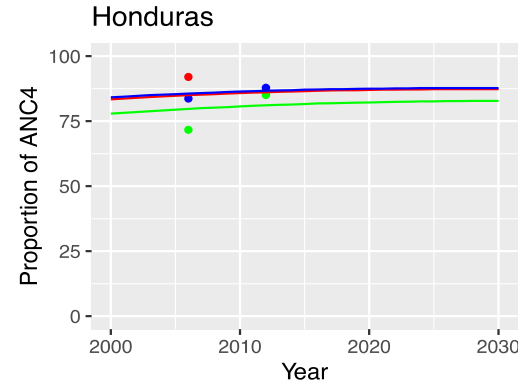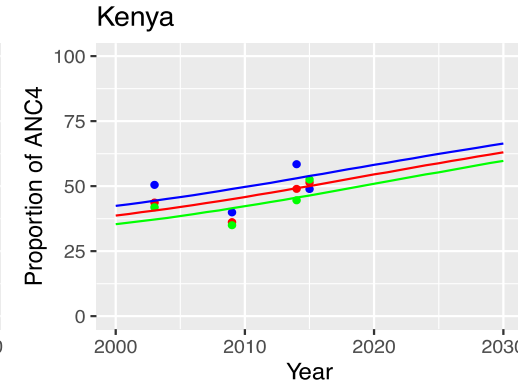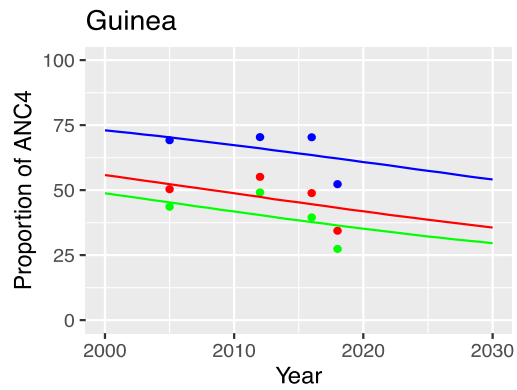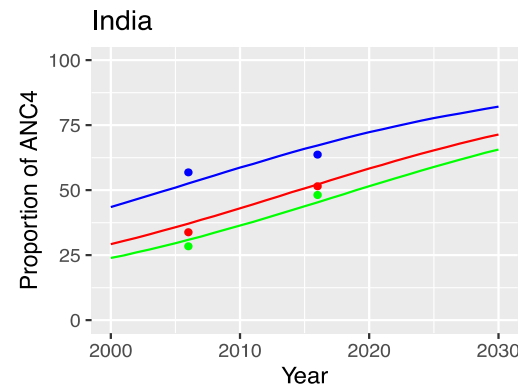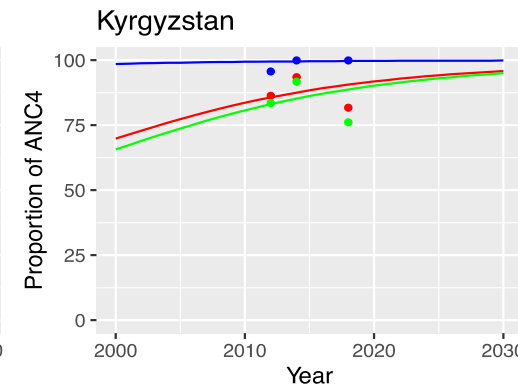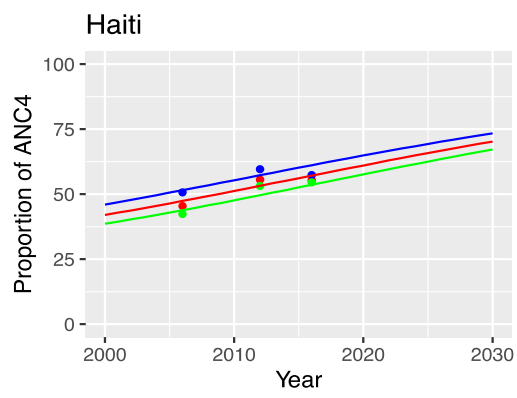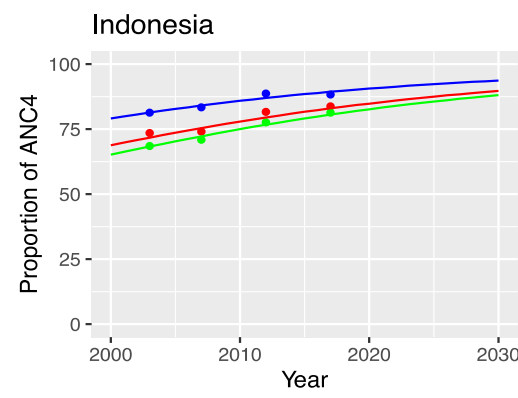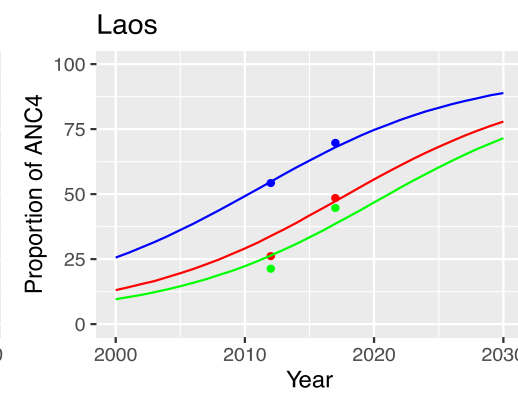

Urban Rural National

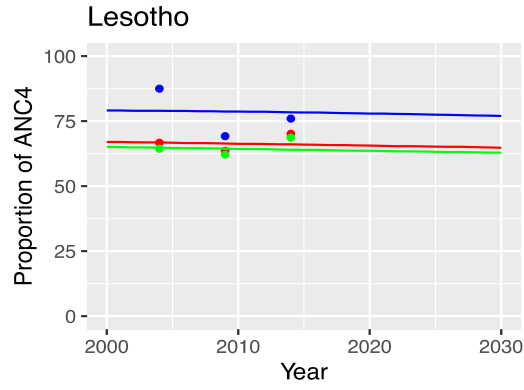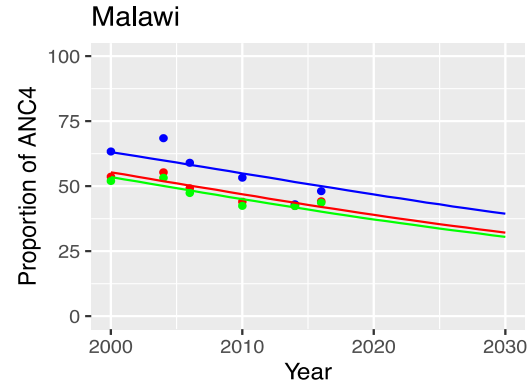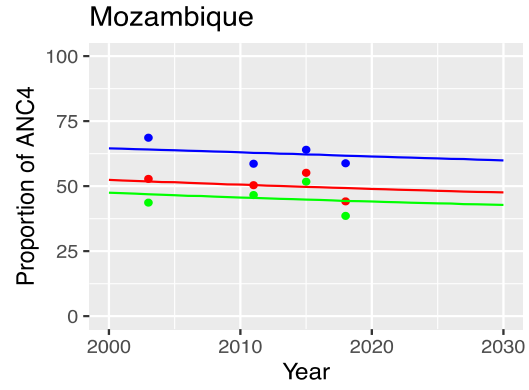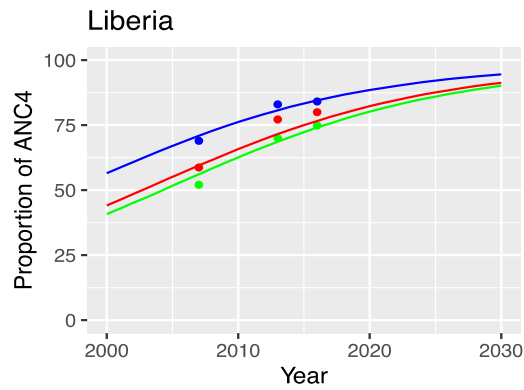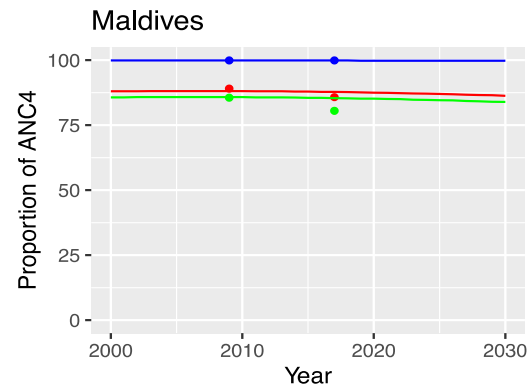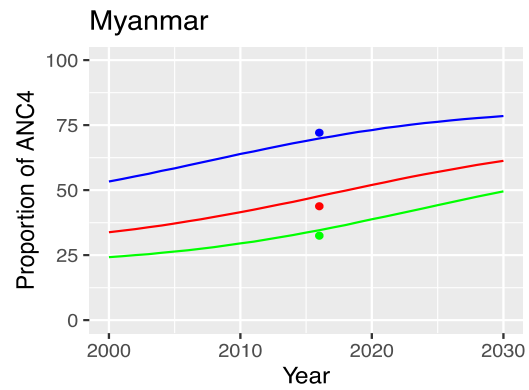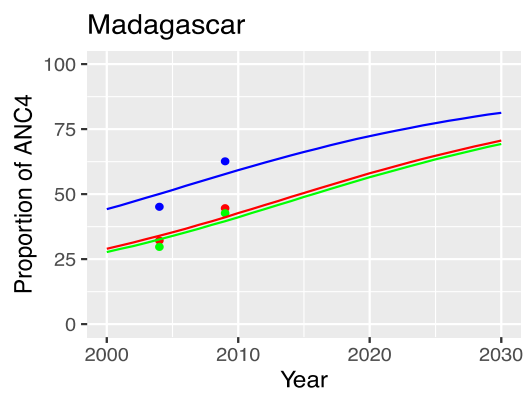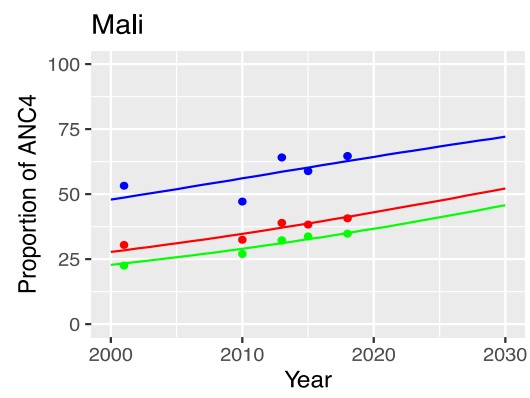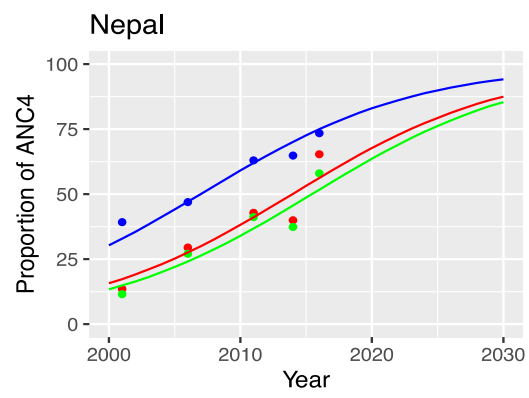

— Urban      — Rural      — National

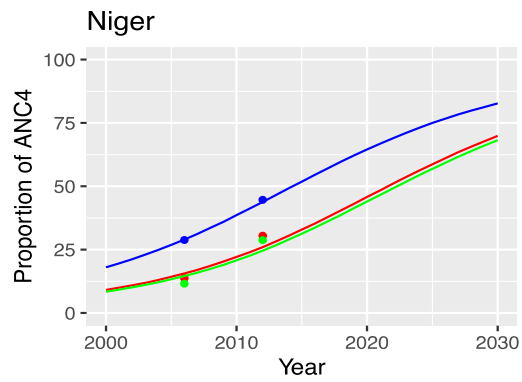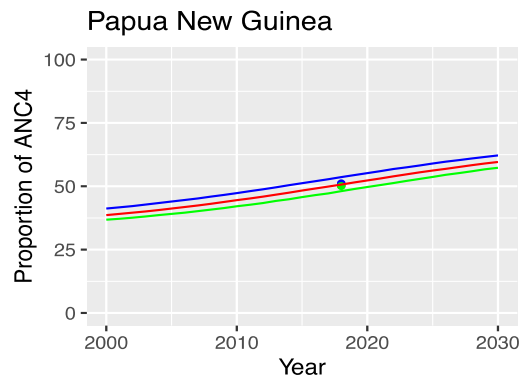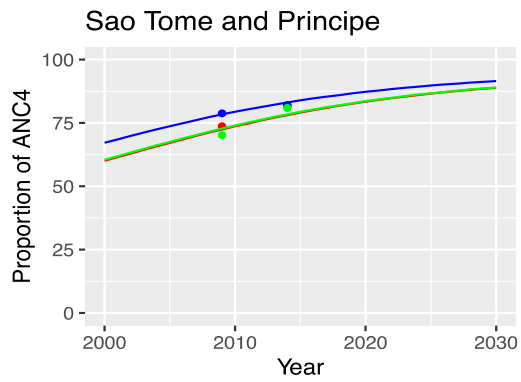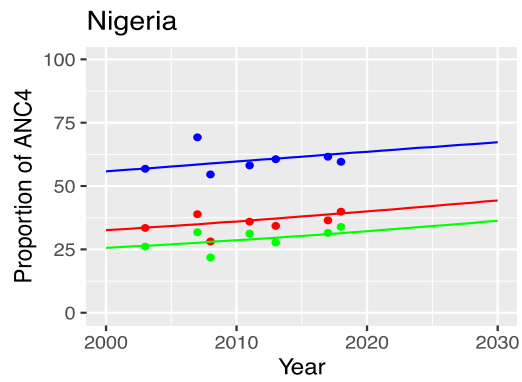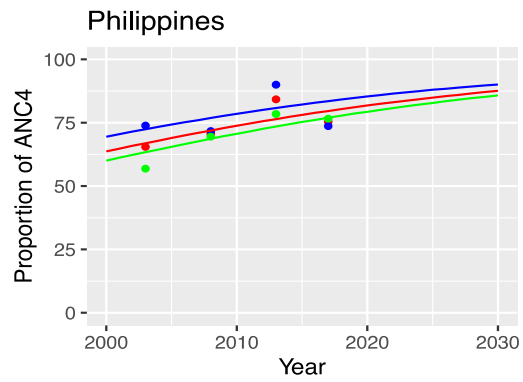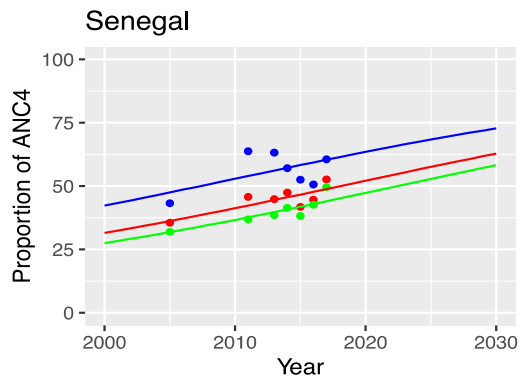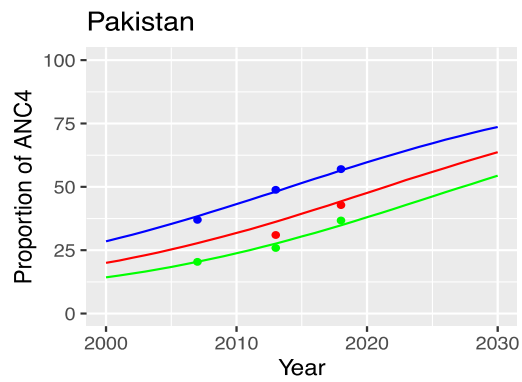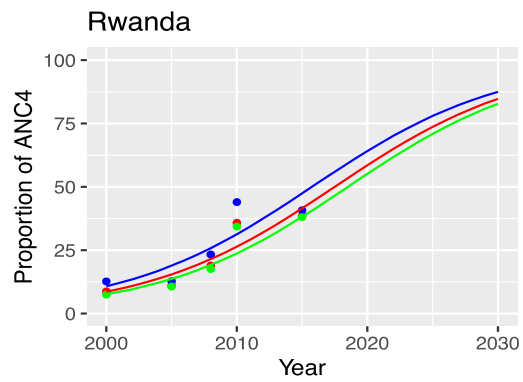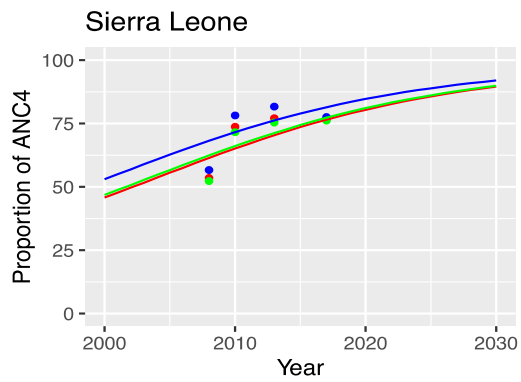

Urban Rural National

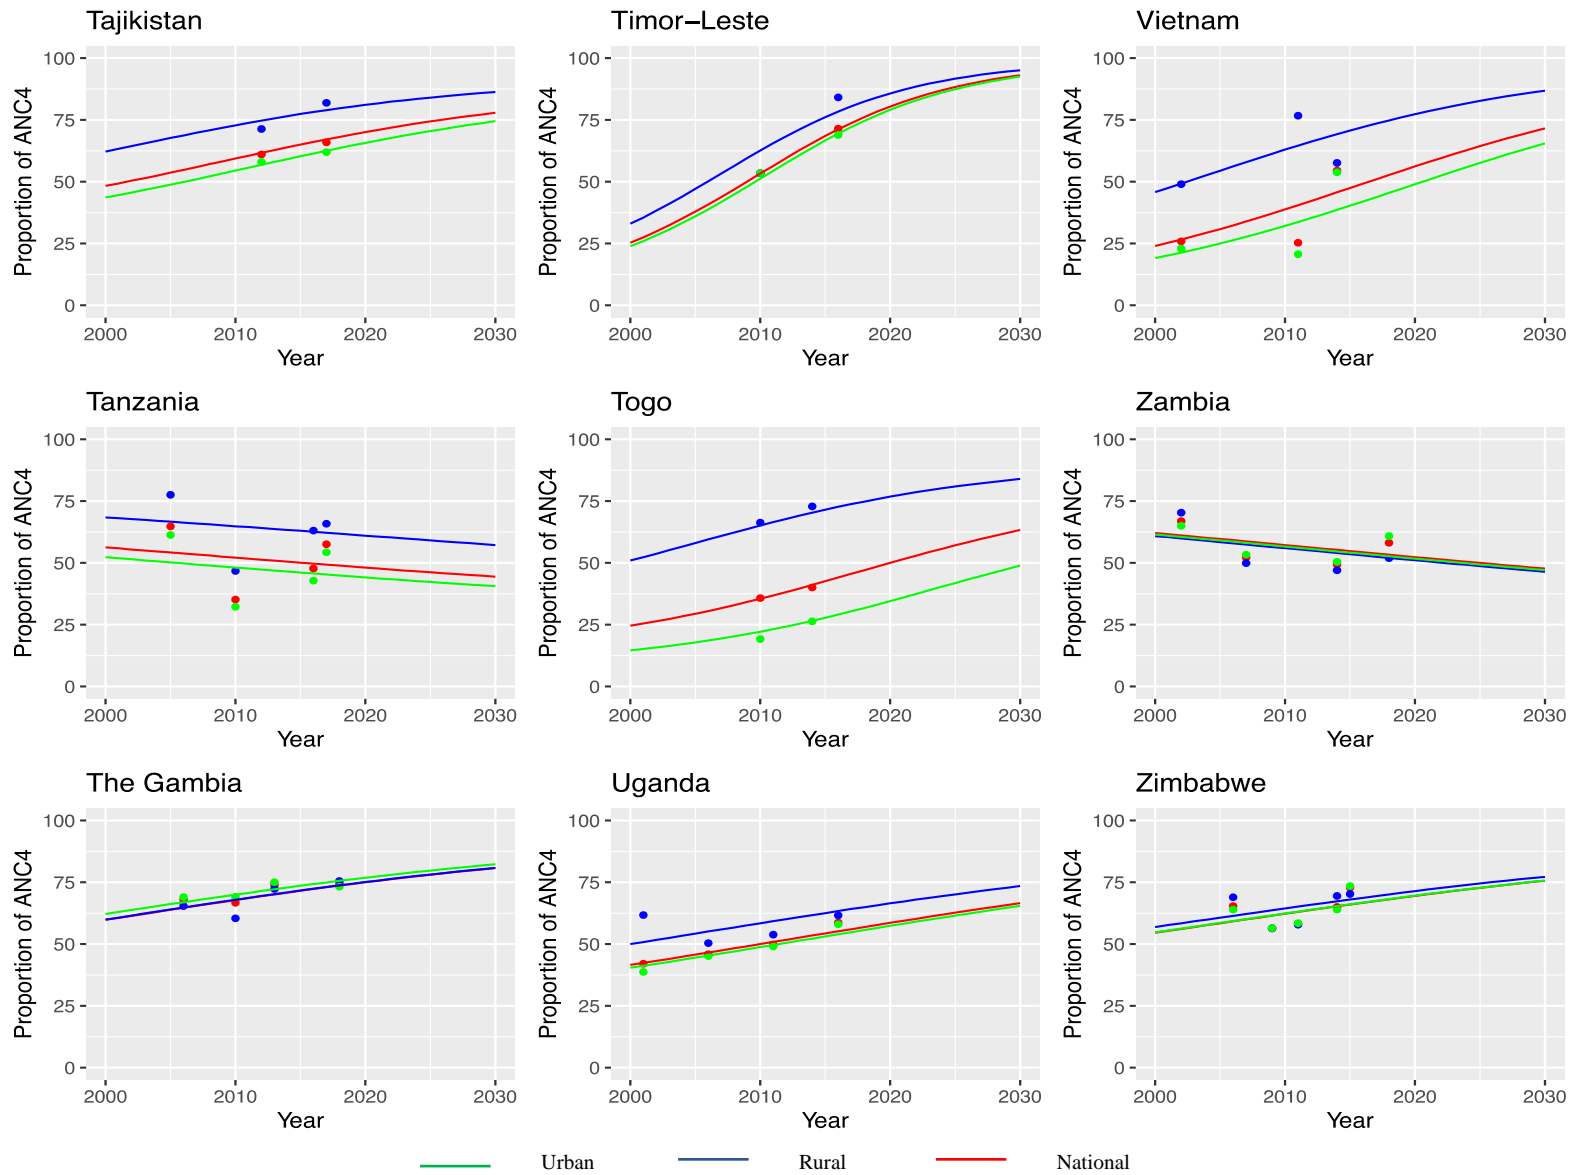

Supplement: jogh-12-06001-s001.pdf [file jogh-12-06001-s001.pdf]
